# Supplementary material for: Tuning the π-bridge of quadrupolar triarylborane chromophores for one- and two-photon excited fluorescence imaging of lysosomes in live cells
Source: PubMed Central journal article supplement — Chem Sci. 2019 Apr 23;10(20):5405–22. doi: 10.1039/c9sc00793h (PMC6549598; doi:10.1039/c9sc00793h), 2019-04-23
Supplement: SC-010-C9SC00793H-s001.pdf [file SC-010-C9SC00793H-s001.pdf]

# Tuning the $\pi$ -Bridge of Quadrupolar Triarylborane Chromophores for One- and Two-Photon Excited Fluorescence Imaging of Lysosomes in Live Cells

## Electronic Supporting Information

Stefanie Griesbeck, Evripidis Michail, Dr. Chenguang Wang, Hiroaki Ogasawara, Sabine Lorenzen, Lukas Gerstner, Theresa Zang, Dr. Jörn Nitsch, Dr. Yoshikatsu Sato, Dr. Rüdiger Bertermann, Dr. Masayasu Taki, Prof. Dr. Christoph Lambert\*, Prof. Dr. Shigehiro Yamaguchi\*, Prof Dr. Todd B. Marder\*

## **Contents**

|                                                              |    |
|--------------------------------------------------------------|----|
| Experimental Section.....                                    | 3  |
| Linear Optical Properties.....                               | 20 |
| TD-DFT Calculations.....                                     | 23 |
| Two-Photon Absorption .....                                  | 29 |
| Imaging.....                                                 | 30 |
| Cell Viability .....                                         | 37 |
| NMR Spectra.....                                             | 38 |
| Cartesian Coordinates for all DFT-Optimized Structures ..... | 54 |
| References.....                                              | 76 |

## Experimental Section

**General information.** Unless otherwise noted, the following conditions apply. Reactions were performed using standard Schlenk or glovebox (Innovative Technology Inc.) techniques under an atmosphere of argon. Only oven-dried glassware was used. Solvents used for reactions were HPLC grade, dried using an Innovative Technology Inc. Solvent Purification System, and further deoxygenated. Tris(dibenzylideneacetone)-dipalladium(0),<sup>1</sup> bis[4-(*N,N*-dimethylamino)-2,6-xylyl]-2,6-dimethyl-4-(4,4,5,5-tetramethyl-1,3,2-dioxaborolan-2-yl)-phenyl-borane,<sup>2</sup> 2,7-dibromopyrene,<sup>3</sup> *N-tert*-butoxycarbonyl-3,6-dibromo-9*H*-carbazole,<sup>4</sup> di-*tert*-butyl-3,6-bis-(5-bromothiophen-2-yl)-1,4-dioxopyrrolo[3,4-*c*]pyrrole-2,5-(1*H*,4*H*)-dicarboxylate<sup>5</sup> and 2-(3,5-dimethylphenyl)-4,4,5,5-tetramethyl-1,3,2-dioxaborolane<sup>6</sup> were synthesized according to literature procedures. All other starting materials were purchased from commercial sources and were used without further purification.

Reaction progress was monitored using thin layer chromatography (TLC) plates pre-coated with a layer of silica (Polygram® Sil G/UV254) with fluorescent indicator UV254 from Marchery-Nagel. Automated flash column chromatography was performed using a Biotage® Isolera Four system with silica gel (Biotage SNAP cartridge KP-Sil 50g or KP-Sil 100g obtained from Biotage) as the stationary phase and the solvent system indicated. Solvents were generally removed *in vacuo* using a rotary evaporator at a maximum temperature of 50 °C.

<sup>1</sup>H, and <sup>13</sup>C{<sup>1</sup>H} solution NMR spectroscopic data were obtained at ambient temperature using a Bruker Avance 500 NMR spectrometer (operating at 500 MHz for <sup>1</sup>H and 125 MHz for <sup>13</sup>C{<sup>1</sup>H}). Chemical shifts ( $\delta$ ) were referenced to solvent peaks as follows: <sup>1</sup>H NMR spectra were referenced to residual protiated solvent in CD<sub>2</sub>Cl<sub>2</sub> (5.32 ppm), CD<sub>3</sub>OD (3.31 ppm) or DMSO (2.50 ppm); and <sup>13</sup>C{<sup>1</sup>H} spectra were referenced to CD<sub>2</sub>Cl<sub>2</sub> (53.84 ppm), CD<sub>3</sub>OD (49.00 ppm) or DMSO (39.52 ppm). The solid-state magic-angle spinning (MAS) NMR spectra were recorded using a Bruker DSX-400 or a Bruker Avance Neo 400 WB spectrometer operating at 128.38 MHz for <sup>11</sup>B and a 4 mm rotor. Spectra are referenced to external BF<sub>3</sub>•Et<sub>2</sub>O. Isotropic chemical shifts were estimated by simulating the observed spectrum using the Solid Line Shape Analysis 2.2.4 (SOLA) in Bruker TopSpin. Due to the very small amount of sample of **4M** and **5M**, a residual boron signal of the boron nitride stator is observable at -30 to 15 ppm.

Elemental analyses were performed on an Elementar vario MICRO cube elemental analyser. As is common for related organo-BMe<sub>2</sub> compounds, carbon analyses of **1M**, **2**, **2M**, **4M** and **5M** were up to 3.6% below the calculated value, while hydrogen, nitrogen and sulphur analyses were satisfactory. This has been ascribed previously to the formation of boron carbide.<sup>7</sup> High resolution mass spectrometry (MS) was performed with a Thermo Fisher Scientific Exactive Plus Orbitrap MS System with either an atmospheric-pressure chemical ionization (APCI),

liquid injection field desorption ionization (LIFDI) or a heated-electrospray ionization (HESI) probe.

**General photophysical measurements.** All measurements were performed in standard quartz cuvettes (1 cm x 1 cm cross-section), except for **5M** in DMSO (plastic or silylated cuvettes were used). UV-visible absorption spectra were recorded using an Agilent 8453 diode array UV-visible spectrophotometer. The molar extinction coefficients were calculated from three independently prepared samples in MeCN (**1M-5M**) and hexane (**1-5**) solution.

The emission spectra were recorded using an Edinburgh Instruments FLSP920 spectrometer equipped with a double monochromator for both excitation and emission, operating in right-angle geometry mode, and all spectra were fully corrected for the spectral response of the instrument. All solutions used in photophysical measurements had a concentration lower than  $5 \times 10^{-6}$  M to minimize inner filter effects during fluorescence measurements.

**Fluorescence quantum yield measurements.** The fluorescence quantum yields were measured using a calibrated integrating sphere (inner diameter: 150 mm) from Edinburgh Instruments combined with the FLSP920 spectrometer described above. For solution-state measurements, the longest-wavelength absorption maximum of the compound in the respective solvent was chosen as the excitation wavelength, unless stated otherwise.

**Lifetime measurements.** Fluorescence lifetimes were recorded using the time-correlated single-photon counting (TCSPC) method using an Edinburgh Instruments FLS980 spectrometer equipped with a high speed photomultiplier tube positioned after a single emission monochromator. Measurements were made in right-angle geometry mode, and the emission was collected through a polarizer set to the magic angle. Solutions were excited with a pulsed diode laser at a wavelength of 376 nm (**1-4, 1M-4M**) and 509 nm (**5, 5M**) at repetition rates of 10 or 20 MHz, as appropriate. The full-width-at-half-maximum (FWHM) of the pulse from the diode laser was *ca.* 80 ps with an instrument response function (IRF) of *ca.* 230 ps FWHM and *ca.* 200 ps with an instrument response function (IRF) of *ca.* 1120 ps FWHM, respectively. The IRFs were measured from the scatter of an aqueous suspension of Ludox at the excitation wavelength. Decays were recorded to 10 000 counts in the peak channel with a record length of 8 192 channels. The band pass of the emission monochromator and a variable neutral density filter on the excitation side were adjusted to give a signal count rate of <60 kHz. Iterative reconvolution of the IRF with one decay function and non-linear least-squares analysis were used to analyse the data. The quality of all decay fits was judged to be satisfactory, based on the calculated values of the reduced  $\chi^2$  and Durbin-Watson parameters and visual inspection of the weighted residuals.

**Two-photon induced fluorescence spectroscopy.** The two-photon absorption cross-section of the compounds was determined by the relative two-photon induced fluorescence technique.

In detail, the fundamental laser source used is an amplified Ti: sapphire laser (Solstice, Spectra Physics) operating at 1 KHz repetition rate with 100 fs pulses at 800 nm. 70% of the available energy seeds a computer-controlled optical parametric amplifier (TOPAS-C, Light Conversion), which produces pulses in the range of 290 - 2600 nm. Excitation of the samples was achieved using a protected silver parabolic mirror, and vertically polarized light with the excitation energy varying in the 0.2 – 3  $\mu$ J range. The latter conditions established by using a series of three thin broadband polarizers and a mechanical rotational mount. Maintenance of identical excitation conditions for both reference and samples was achieved using a high precision motorized rotational stage to ensure that the unknown compounds and the secondary reference standard are subjected to the same excitation conditions. Perylene in  $\text{CH}_2\text{Cl}_2$ , Coumarin 540A in  $\text{CCl}_4$ , Rhodamine 6G in  $\text{CH}_3\text{OH}$  and Styryl 9M in  $\text{CHCl}_3$  were used as reference compounds.<sup>8,9</sup> The emitted fluorescence signal was detected at 90° with respect to the excitation beam, and recorded using a compact CCD spectrometer. Two-photon excitation was verified by log-log plots of fluorescence intensities vs. excitation power at various wavelengths, all giving slopes of 2 (see Figure S5).

**Theoretical studies.** All calculations (DFT and TD-DFT) were carried out with the Gaussian 09 (Rev. D.01) program package<sup>10</sup> and were performed on a parallel cluster system. GaussView 5.0.9 was used to visualize the results, to measure calculated structural parameters, and to plot orbital surfaces (isovalue:  $\pm 0.03 [e a_0^{-3}]^{1/2}$ ). The ground-state geometries were optimized using the B3LYP functional<sup>11-13</sup> in combination with the 6-31G(d) basis set.<sup>14, 15</sup> The optimized geometries were confirmed to be local minima by performing frequency calculations and obtaining only positive (real) frequencies. Stability analysis showed the wavefunction to be stable in each case. Based on these optimized structures, the lowest-energy gas-phase vertical transitions were calculated (singlets, 10 states) by TD-DFT, using the Coulomb-attenuated functional CAM-B3LYP<sup>16</sup> in combination with the 6-31G(d) basis set.<sup>11, 12</sup> The CAM-B3LYP functional has been shown to be effective for the ICT systems, hence its selection here.<sup>17-21</sup> The optimizations were conducted with inclusion of hexane (**1-5**) or water (**1M-5M**) solvation through the polarizable continuum model (PCM). The ultrafine integration grid was used throughout.

**Cell culture.** HeLa and HepG2 cells (RIKEN Cell Bank, Japan) were cultured in Dulbecco's modified Eagle's medium (DMEM, Wako) containing 10% fetal bovine serum (FBS, Biosera) and 1% Antibiotic-Antimycotic (AA, Wako) at 37 °C in a 5%  $\text{CO}_2$ /95% air incubator. Cells ( $5 \times 10^4$ ) were seeded in poly-lysine coated glass-bottom dishes three days before imaging. In order to facilitate the generation of lipid droplets, the HepG2 cells were treated with fatty acids (oleic acid:palmitic acid = 2:1, 1 mM) in DMEM for 24 h before staining with dyes.

**Staining Experiments.** The incubation medium was removed from the HeLa cells, and the cells were further incubated with 5  $\mu\text{M}$  **1-3** in DMEM containing 0.5% DMSO for 1 h in a CO<sub>2</sub> incubator. Afterwards, the cells were rinsed with DMEM three times and the dish was filled with 1.5 mL of DMEM. Fluorescence images before and after washing were obtained with a FV10i-DOC confocal laser-scanning microscope (OLYMPUS), with a 405 nm LD laser for excitation. The fluorescence signals were collected between 570-670 nm.

The incubation medium was removed from the HepG2 cells and the cells were further incubated with 5  $\mu\text{M}$  of **1** or 5  $\mu\text{M}$  of **1** premixed with 0.04% Pluronic F-127 in DMEM containing 0.5% DMSO for 24 h in a CO<sub>2</sub> incubator. Fluorescence images before and after washing were obtained with a FV10i-DOC confocal laser-scanning microscope (OLYMPUS), with a 405 nm LD laser for excitation. The fluorescence signals were collected between 570-670 nm.

**Co-staining experiments.** The incubation medium was removed from the cells, and the cells were further incubated with 0.5  $\mu\text{M}$  **1M-5M** in DMEM containing 0.5% DMSO for 2 h in a CO<sub>2</sub> incubator. Then the cells were rinsed with DMEM three times and the dish was filled with 2.0 mL of DMEM containing 0.1  $\mu\text{M}$  LysoTracker™ Green or LysoTracker™ Red (Invitrogen) and further incubated for 20 min in a CO<sub>2</sub> incubator. Fluorescence images were obtained with a confocal microscope (TCS SP8 STED 3X; Leica), including an inverted DMI6000 CS microscope equipped with a laser diode (405 nm), a tuneable (470 – 670 nm) pulsed white light laser (WLL; repetition rate of 78 MHz) for excitation. For confocal imaging, a HyD detector and 100 × oil-immersion objective (NA 1.4) were used. The dyes were excited with the 405 nm diode laser (**1M, 2M, 3M, 4M**), and the 561 nm wavelength of the WLL (LysoTracker™ Red). The fluorescence signals were collected between 450 and 550 nm (**1M, 2M, 3M**), 500 and 605 nm (**4M**), 600 and 750 nm (LysoTracker™ Red in the co-staining experiment with **1M-3M**) and 607 and 786 nm (LysoTracker™ Red in the co-staining experiment with **4M**) with a time gating interval of 0.1 – 12 ns. Each image was recorded with a line average of 4. To avoid crosstalk among the channels, the emission signals were collected independently in the sequential scanning mode. Fluorescence images (**5M**) were obtained with an FV10i-DOC confocal laser-scanning microscope (OLYMPUS), using LD lasers of 473 nm and 559 nm were used for the excitation of LysoTracker™ Green and **5M**, respectively. The fluorescence signals were collected between 490 and 540 nm (LysoTracker™ Green) and 570 and 670 nm (**5M**). Images were processed with Fiji software.

**Cytotoxicity evaluation.** HeLa cells were seeded into a flat-bottomed 96-well plate (1 × 10<sup>4</sup> cells/well) and incubated in DMEM at 37 °C in a 5% CO<sub>2</sub>/95% air incubator for 24 h. The medium was then replaced with culture medium (100  $\mu\text{L}$ /well) containing various concentrations of **1M-5M** (0, 0.5, 1, 5, and 10  $\mu\text{M}$ ) in DMEM (0.5% DMSO). Then the cells were incubated for 24 h at 37 °C, MTT reagent (10  $\mu\text{L}$ /well, 0.5 mg/mL) in PBS was added to each

well, and the plates were incubated for another 4 h in a CO<sub>2</sub> incubator. The medium was then removed, the formazan crystals were solubilized in DMSO (100  $\mu$ L/well) for 10 min at room temperature, and the absorbance of each well was measured using a SpectraMax i3 (Molecular Devices) with an excitation at 535 nm.

**Uptake pathway.** The incubation medium was removed from the cells, and the cells were incubated with 0.5  $\mu$ M **5M** in 1.5 mL DMEM. Fluorescence images (**5M**) were obtained with a FV10i-DOC confocal laser-scanning microscope (OLYMPUS), and a 559 nm LD laser was used for the excitation of **5M**. The fluorescence signals were collected between 570 and 670 nm every 10 min over a period of 2 hours. Images were processed with Fiji software.

In the cellular uptake control experiment, cells were stained at 37 °C with 500 nM of **5M** in DMEM, washed with fresh DMEM and subsequent imaging. In the cellular uptake experiment at 4 °C experiment, cells were incubated at 4 °C for 30 min, then grown in DMEM containing **5M** (500 nM) for 2 h at 4 °C, washed with fresh DMEM and subsequent imaging. In the cellular uptake experiment in the presence of NaN<sub>3</sub> cells were first pretreated at 37 °C for 30 min with DMEM containing 0.1% NaN<sub>3</sub> and then incubated with DMEM containing **5M** (500 nM) and 0.1% NaN<sub>3</sub> for 2 h at 37 °C. Afterwards, the cells were washed with fresh DMEM followed by imaging. Fluorescence images were obtained with a FV10i-DOC confocal laser-scanning microscope (OLYMPUS), and a 559 nm LD laser was used for the excitation of **5M**. The fluorescence signals were collected between 570 and 670 nm.

**Photostability.** The incubation medium was removed from the cells, and the cells were further incubated with 0.5  $\mu$ M **5M** or 0.1  $\mu$ M LysoTracker™ Red (Invitrogen) in DMEM in a CO<sub>2</sub> incubator for 2 h or 20 min, respectively. Then cells stained with **5M** were rinsed with DMEM three times and the dish was filled with 1.5 mL of DMEM. Imaging experiments were conducted using a Leica TCS SP8 STED 3X system (Leica Microsystems), including an inverted DMI6000 CS microscope equipped with a tuneable (470 – 670 nm) pulsed white light laser (WLL; repetition rate of 78 MHz) for excitation. For confocal imaging, a HyD detector and 100  $\times$  oil-immersion objective (NA 1.4) were used. For the evaluation of photostability under confocal conditions, dye-stained cells prepared above were irradiated with a WLL at 561 nm, the fluorescence signals were collected between 570 and 770 nm and images were acquired at the following setting: 1024  $\times$  1024 pixels; scan speed of 100 Hz; bidirectional model; zoom factor of 5; line average of 4; frame average of 1. The total signal intensity of each image was normalized to the value of the first image and plotted as a function of the number of recorded confocal images.

**TPA imaging.** The incubation medium was removed from the cells, and the cells were further incubated with 0.5  $\mu$ M **5M** in DMEM in a CO<sub>2</sub> incubator for 2 h. Then the cells were rinsed with DMEM three times and the dish was filled with 15 mL of DMEM containing 20 mM HEPES (pH

= 7.4). Imaging experiments were conducted using a Leica SP8-MP system (Leica Microsystems), equipped with a tuneable (680 – 1300 nm) for laser two-photon excitation. For TPA imaging, a HyD detector with a 650/50 bandpass filter and a Lens HC Fluotar L 25 × 0.95 W VisIR objective were used. The dye was excited with the 720 nm wavelength of the laser and fluorescence signals were collected between 600 and 700 nm.



## Synthesis

### 4,4'-Bis[4-[bis[4-(*N,N*-dimethylamino)-2,6-xylyl]boryl]-3,5-xylyl]-1,1'-biphenyl 1

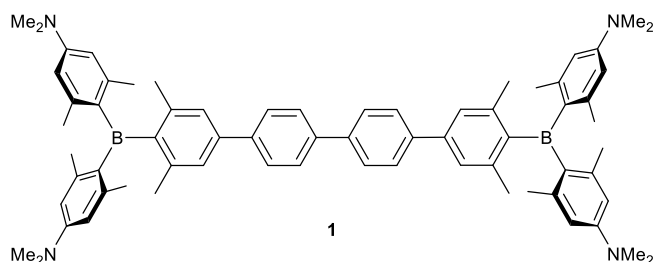

Compound **6** (500 mg, 0.93 mmol, 2.1 eq.), 4,4'-dibromobiphenyl (138 mg, 0.44 mmol, 1.0 eq.) and KOH (149 mg, 2.66 mmol, 6.0 eq.) were dissolved in a degassed mixture of H<sub>2</sub>O (5 mL) and toluene (10 mL). The reaction mixture was degassed for 15 min and SPhos (36.4 mg, 88.7  $\mu$ mol, 20 mol%) and Pd<sub>2</sub>(dba)<sub>3</sub> (24.3 mg, 23.5  $\mu$ mol, 5 mol%) were added. After heating to 85 °C for 3 d, the aqueous layer was extracted with hexane (3 x 30 mL). The solvent was evaporated and the crude product was purified by automated flash column chromatography (KP-Sil 50g, hexane:ethylacetate 5:1) to obtain compound **1** as a yellow solid (310 mg, 72%).

**<sup>1</sup>H NMR** (500 MHz, CD<sub>2</sub>Cl<sub>2</sub>):  $\delta$  = 7.77 – 7.73 (m, 8H), 7.25 (s, 4H), 6.33 (s, 4H), 6.33 (s, 4H), 2.96 (s, 24H), 2.12 (s, 12H), 2.03 (s, 12H), 1.99 (s, 12H) ppm.

**<sup>13</sup>C{<sup>1</sup>H} NMR** (125 MHz, CD<sub>2</sub>Cl<sub>2</sub>):  $\delta$  = 151.7, 149.0, 143.2, 142.9, 141.1, 140.4, 140.2, 139.6, 136.2, 127.5, 127.4, 126.0, 111.9, 111.8, 40.2, 24.0, 23.8, 23.1 ppm.

**Solid-State <sup>11</sup>B{<sup>1</sup>H} NMR** (128 MHz): Isotropic chemical shift  $\delta_{\text{iso}}$  = 72.8 ppm, quadrupole coupling constant  $C_Q$  = 4.49 MHz, quadrupolar asymmetry parameter  $\eta_{\text{Quad}}$  = 0.0.

**HRMS** (ESI<sup>+</sup>):  $m/z$  found: [M]<sup>+</sup> 975.6637; calc. for [C<sub>68</sub>H<sub>80</sub>B<sub>2</sub>N<sub>4</sub>]<sup>+</sup> 975.6642 ( $|\Delta|$  = 0.51 ppm).

**Elem. Anal. Calc.** (%) for C<sub>68</sub>H<sub>80</sub>B<sub>2</sub>N<sub>4</sub>: C 83.77, H 8.27, N 5.75; found: C 83.83, H 8.28, N 5.49.

**4,4'-Bis[4-[bis[4-(*N,N,N*-trimethylammonio)-2,6-xylyl]-boryl]-3,5-xylyl]-1,1'-biphenyl tetratriflate **1M****

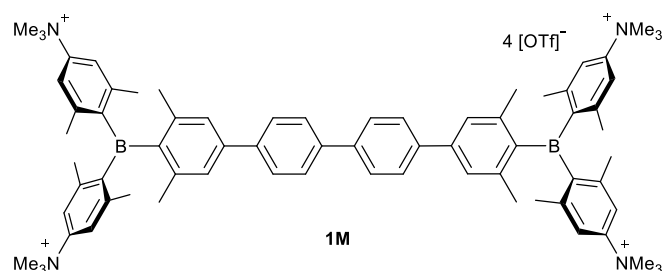

In a soda-lime glass vial, compound **1** (15.0 mg, 15.4  $\mu\text{mol}$ , 1.0 eq.) was dissolved in degassed DCM (2.0 mL). After the addition of MeOTf (7.74  $\mu\text{L}$ , 69.2  $\mu\text{mol}$ , 4.5 eq.), the reaction mixture was stirred at r.t. for 2 d. The white precipitate was collected by filtration and washed with Et<sub>2</sub>O (6.0 mL) to obtain compound **1M** as a pale yellow solid (19.6 mg, 78%).

**<sup>1</sup>H NMR** (500 MHz, CD<sub>3</sub>OD):  $\delta$  = 7.80 (s, 8H), 7.58 (s, 4H), 7.58 (s, 4H), 7.40 (s, 4H), 3.67 (s, 36H), 2.26 (s, 12H), 2.18 (s, 12H), 2.13 (s, 12H) ppm.

**<sup>13</sup>C{<sup>1</sup>H} NMR** (125 MHz, CD<sub>3</sub>OD):  $\delta$  = 149.7, 149.5, 145.2, 145.0, 144.5, 144.4, 142.9, 141.2, 140.5, 128.4, 128.3, 127.8, 121.8 (q,  $J$  = 319 Hz), 120.1, 57.5, 23.6, 23.6, 23.4 ppm.

**Solid-State <sup>11</sup>B{<sup>1</sup>H} NMR** (128 MHz): Isotropic chemical shift  $\delta_{\text{iso}}$  = 79.2 ppm, quadrupole coupling constant  $C_Q$  = 4.86 MHz, quadrupolar asymmetry parameter  $\eta_{\text{Quad}}$  = 0.0.

**HRMS** (ESI<sup>+</sup>):  $m/z$  found: [M-2OTf]<sup>2+</sup> 666.3266; calc. for [C<sub>74</sub>H<sub>92</sub>B<sub>2</sub>F<sub>6</sub>N<sub>4</sub>O<sub>6</sub>S<sub>2</sub>]<sup>2+</sup> 666.3269 ( $|\Delta|$  = 0.45 ppm).

**Elem. Anal. Calc.** (%) for C<sub>76</sub>H<sub>92</sub>B<sub>2</sub>F<sub>12</sub>N<sub>4</sub>O<sub>12</sub>S<sub>4</sub>: C 55.95, H 5.68, N 3.43, S 7.86; found: C 54.76, H 5.88, N 3.53, S 7.62.

## 2,7-Bis[4-[bis[4-(*N,N*-dimethylamino)-2,6-xylyl]boryl]-3,5-xylyl]-pyrene **2**

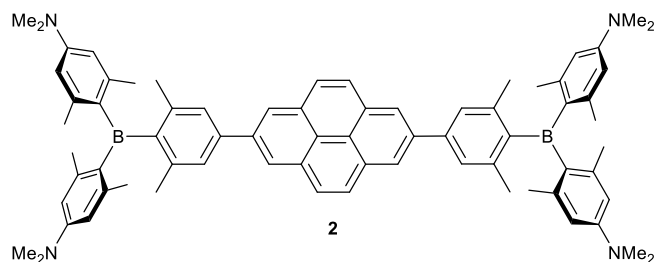

Compound **6** (1.00 g, 1.86 mmol, 2.2 eq.), 2,7-dibromopyrene (304 mg, 0.85 mmol, 1.0 eq.) and KOH (285 mg, 5.07 mmol, 6.0 eq.) were dissolved in a degassed mixture of  $\text{H}_2\text{O}$  (5 mL) and toluene (10 mL). The reaction mixture was degassed for 15 min and SPhos (104 mg, 254  $\mu\text{mol}$ , 30 mol%) and  $\text{Pd}_2(\text{dba})_3$  (52.5 mg, 50.7  $\mu\text{mol}$ , 6 mol%) were added. After heating to 85 °C for 16 h, the aqueous layer was extracted with hexane (3 x 30 mL). The solvent was evaporated and the crude product was purified by automated flash column chromatography (KP-Sil 100g, hexane:ethylacetate 9:1). The yellow solid obtained was dissolved in DCM and crystallized by adding MeOH to afford **2** as a yellow solid (399 mg, 46%).

$^1\text{H NMR}$  (500 MHz,  $\text{CD}_2\text{Cl}_2$ ):  $\delta$  = 8.49 (s, 4H), 8.15 (s, 4H), 7.51 (s, 4H), 6.36 (s, 8H), 2.97 (s, 24H), 2.21 (s, 12H), 2.07 (s, 12H), 2.05 (s, 12H) ppm.

$^{13}\text{C}\{^1\text{H}\}$  NMR (125 MHz,  $\text{CD}_2\text{Cl}_2$ ):  $\delta$  = 151.7, 149.1, 143.3, 143.0, 141.4, 141.0, 139.3, 136.2, 131.9, 128.2, 127.0, 124.1, 123.9, 111.9, 111.9, 40.2, 24.1, 23.9, 23.2 ppm.

**Solid-State  $^{11}\text{B}\{^1\text{H}\}$  NMR** (128 MHz): Isotropic chemical shift  $\delta_{\text{iso}} = 71.9$  ppm, quadrupole coupling constant  $C_Q = 4.51$  MHz, quadrupolar asymmetry parameter  $\eta_{\text{Quad}} = 0.0$ .

**HRMS** (ESI<sup>+</sup>):  $m/z$  found:  $[\text{M}]^+$  987.6623; calc. for  $[\text{C}_{69}\text{H}_{80}\text{B}_2\text{N}_4]^+$  987.6642 ( $|\Delta| = 1.92$  ppm).

**Elem. Anal. Calc.** (%) for  $\text{C}_{72}\text{H}_{82}\text{B}_2\text{N}_4$ : C 84.36, H 8.06, N 5.47; found: C 82.87, H 8.05, N 5.33.

**2,7-Bis[4-[bis[4-(*N,N,N*-trimethylammonio)-2,6-xylyl]-boryl]-3,5-xylyl]-pyrene tetratriflate **2M****

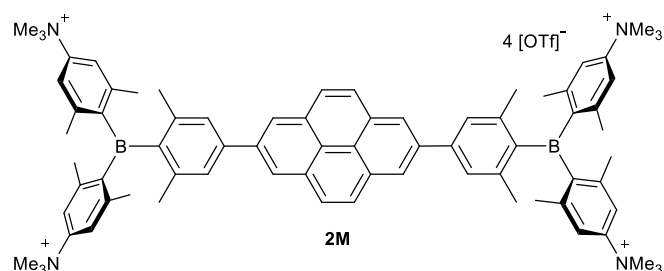

In a soda-lime glass vial, compound **2** (15.0 mg, 146  $\mu\text{mol}$ , 1.0 eq.) was dissolved in degassed DCM (3.0 mL). After the addition of MeOTf (7.47  $\mu\text{L}$ , 65.7  $\mu\text{mol}$ , 4.5 eq.), the reaction mixture was stirred at r.t. for 2 d. The precipitate was collected by filtration and washed with Et<sub>2</sub>O (6.0 mL) to obtain compound **2M** as a brown solid (21.4 mg, 91%).

**<sup>1</sup>H NMR** (500 MHz, CD<sub>3</sub>OD):  $\delta$  = 8.55 (s, 4H), 8.23 (s, 4H), 7.69 (s, 4H), 7.62 (br s, 4H), 7.62 (br s, 4H), 3.67 (s, 36H), 2.33 (s, 12H), 2.23 (s, 12H), 2.22 (s, 12H) ppm.

**<sup>13</sup>C{<sup>1</sup>H} NMR** (125 MHz, CD<sub>3</sub>OD):  $\delta$  = 149.7, 149.5, 145.3, 145.2, 145.0, 144.5, 143.0, 139.4, 133.1, 129.1, 128.8, 125.1, 124.7, 121.8 (q,  $J$  = 319 Hz), 120.1, 57.5, 23.6, 23.5 ppm.

**Solid-State <sup>11</sup>B{<sup>1</sup>H} NMR** (128 MHz): Isotropic chemical shift  $\delta_{\text{iso}}$  = 77.2 ppm, quadrupole coupling constant  $C_Q$  = 4.78 MHz, quadrupolar asymmetry parameter  $\eta_{\text{Quad}}$  = 0.0.

**HRMS** (ESI<sup>+</sup>):  $m/z$  found: [M-4OTf]<sup>4+</sup> 270.6869; calc. for [C<sub>76</sub>H<sub>92</sub>B<sub>2</sub>N<sub>4</sub>]<sup>4+</sup> 270.6872 ( $|\Delta|$  = 1.11 ppm).

**Elem. Anal. Calc.** (%) for C<sub>80</sub>H<sub>92</sub>B<sub>2</sub>F<sub>12</sub>N<sub>4</sub>O<sub>12</sub>S<sub>4</sub>: C 57.21, H 5.52, N 3.34 S 7.64; found: C 56.17, H 5.75, N 3.39, S 7.37.

### 2,7-Bis[4-[bis[4-(*N,N*-dimethylamino)-2,6-xylyl]-boryl]-3,5-xylyl]-fluorene **3**

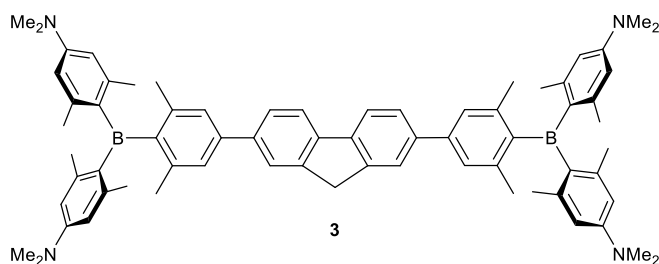

Compound **6** (1.00 g, 1.86 mmol, 2.2 eq.), 2,7-dibromofluorene (274 mg, 0.85 mmol, 1.0 eq.) and KOH (285 mg, 5.08 mmol, 6.0 eq.) were dissolved in a degassed mixture of H<sub>2</sub>O (5 mL) and toluene (10 mL). The reaction mixture was degassed for 15 min and SPhos (104 mg, 253  $\mu$ mol, 30 mol%) and Pd<sub>2</sub>(dba)<sub>3</sub> (52.5 mg, 50.7  $\mu$ mol, 6 mol%) were added. After heating to 85 °C for 16 h, the aqueous layer was extracted with hexane (3 x 30 mL). The solvent was evaporated and the crude product was purified by automated flash column chromatography (KP-Sil 100g, hexane:ethylacetate 98:2). The yellow solid obtained was dissolved in Et<sub>2</sub>O and crystallized by adding MeOH to afford **3** as a yellow solid (511 mg, 61%).

**<sup>1</sup>H NMR** (500 MHz, CD<sub>2</sub>Cl<sub>2</sub>):  $\delta$  = 7.88 – 7.85 (m, 4H), 7.72 – 7.70 (m, 2H), 7.28 (s, 4H), 6.35 (s, 4H), 6.35 (s, 4H), 4.03 (s, 2H), 2.97 (s, 24H), 2.14 (s, 12H), 2.06 (s, 12H), 2.02 (s, 12H) ppm.

**<sup>13</sup>C{<sup>1</sup>H} NMR** (125 MHz, CD<sub>2</sub>Cl<sub>2</sub>):  $\delta$  = 151.7, 148.8, 144.7, 143.2, 142.9, 141.1, 141.1, 140.9, 140.1, 136.3, 126.2, 126.0, 123.8, 120.4, 111.9, 111.8, 40.2, 37.4, 24.0, 23.8, 23.2 ppm.

**Solid-State <sup>11</sup>B{<sup>1</sup>H} NMR** (128 MHz): Isotropic chemical shift  $\delta_{\text{iso}}$  = 73.0 ppm, quadrupole coupling constant  $C_Q$  = 4.53 MHz, quadrupolar asymmetry parameter  $\eta_{\text{Quad}}$  = 0.0.

**HRMS** (ESI<sup>+</sup>):  $m/z$  found: [M]<sup>+</sup> 987.6623; calc. for [C<sub>69</sub>H<sub>80</sub>B<sub>2</sub>N<sub>4</sub>]<sup>+</sup> 987.6642 ( $|\Delta|$  = 1.92 ppm).

**Elem. Anal. Calc.** (%) for C<sub>69</sub>H<sub>80</sub>B<sub>2</sub>N<sub>4</sub>: C 83.96, H 8.17, N 5.68; found: C 83.94, H 8.38, N 5.71.

**2,7-Bis[4-[bis[4-(*N,N,N*-trimethylammonio)-2,6-xylyl]-boryl]-3,5-xylyl]-fluorene tetratriflate **3M****

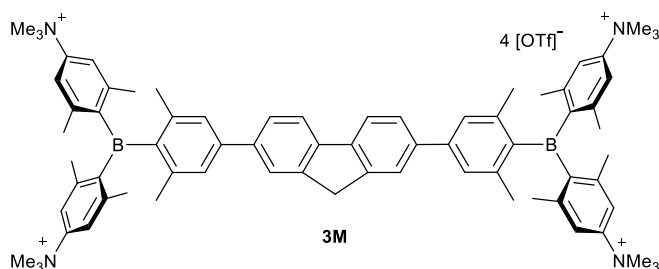

In a soda-lime glass vial, compound **3** (15.0 mg, 15.2  $\mu\text{mol}$ , 1.0 eq.) was dissolved in degassed DCM (2.0 mL). After the addition of MeOTf (7.74  $\mu\text{L}$ , 68.4  $\mu\text{mol}$ , 4.5 eq.), the reaction mixture was stirred at r.t. for 2 d. The yellow precipitate was collected by filtration and washed with Et<sub>2</sub>O (6.0 mL) to obtain compound **3M** as a yellow solid (22.8 mg, 91%).

**<sup>1</sup>H NMR** (500 MHz, CD<sub>3</sub>OD):  $\delta$  = 7.93 – 7.92 (m, 2H), 7.91 - 7.90 (m, 2H), 7.73 - 7.72 (m, 2H), 7.58 (s, 8H), 7.41 (s, 4H), 4.06 (s, 2H), 3.67 (s, 36H), 2.27 (s, 12H), 2.18 (s, 12H), 2.13 (s, 12H) ppm.

**<sup>13</sup>C{<sup>1</sup>H} NMR** (125 MHz, CD<sub>3</sub>OD):  $\delta$  = 149.6, 149.5, 145.8, 145.3, 144.9, 144.5, 142.9, 142.4, 140.3, 127.9, 127.0, 124.6, 121.8 (q,  $J$  = 319 Hz), 121.4, 120.1, 57.5, 37.8, 23.6, 23.4 ppm.

**Solid-State <sup>11</sup>B{<sup>1</sup>H} NMR** (128 MHz): Isotropic chemical shift  $\delta_{\text{iso}}$  = 77.1 ppm, quadrupole coupling constant  $C_Q$  = 4.76 MHz, quadrupolar asymmetry parameter  $\eta_{\text{Quad}}$  = 0.0.

**HRMS** (ESI<sup>+</sup>):  $m/z$  found: [M-4OTf]<sup>4+</sup> 261.6870; calc. for [C<sub>73</sub>H<sub>92</sub>B<sub>2</sub>N<sub>4</sub>]<sup>4+</sup> 261.6872 ( $|\Delta|$  = 0.76 ppm).

**Elem. Anal. Calc.** (%) for C<sub>77</sub>H<sub>92</sub>B<sub>2</sub>F<sub>12</sub>N<sub>4</sub>O<sub>12</sub>S<sub>4</sub>: C 56.28, H 5.64, N 3.41 S 7.80; found: C 56.38, H 5.94, N 3.56 S 7.63.

### 3,6-Bis[4-[bis[4-(*N,N*-dimethylamino)-2,6-xylyl]boryl]-3,5-xylyl]-*N*-Boc-carbazole **4**

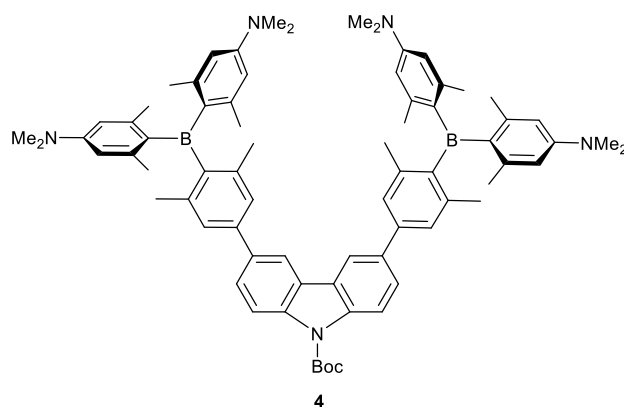

Compound **6** (1.00 g, 1.86 mmol, 2.2 eq.), 3,6-dibromo-*N*-Boc-carbazole (359 mg, 0.84 mol, 1.0 eq.) and KOH (283 mg, 5.04 mmol, 6.0 eq.) were dissolved in a degassed mixture of H<sub>2</sub>O (10 mL) and toluene (20 mL). The reaction mixture was degassed for 15 min and SPhos (103 mg, 252  $\mu$ mol, 30 mol%) and Pd<sub>2</sub>(dba)<sub>3</sub> (52.2 mg, 50.4  $\mu$ mol, 6 mol%) were added. After heating to 85 °C for 3 d, the aqueous layer was extracted with hexane (3 x 30 mL). The solvent was evaporated and the crude product was purified by automated flash column chromatography (KP-Sil 100g, hexane:ethylacetate 97:3 → 95:5 → 90:10) to obtain compound **4** as a yellow solid (757 mg, 83%).

<sup>1</sup>H NMR (500 MHz, CD<sub>2</sub>Cl<sub>2</sub>):  $\delta$  = 8.42 - 8.41 (m, 2H), 8.40 - 8.39 (m, 2H), 7.87 - 7.85 (m, 2H), 7.40 (s, 4H), 6.39 - 6.38 (m, 8H), 3.00 (s, 24H), 2.21 (s, 12H), 2.10 (s, 12H), 2.08 (s, 12H), 1.84 (s, 9H) ppm.

<sup>13</sup>C{<sup>1</sup>H} NMR (125 MHz, CD<sub>2</sub>Cl<sub>2</sub>):  $\delta$  = 151.7, 151.4, 148.7, 143.2, 142.9, 141.2, 140.8, 138.7, 136.6, 136.3, 126.7, 126.4, 126.3, 118.0, 116.9, 112.0, 111.9, 84.4, 40.2, 28.6, 24.1, 23.9, 23.3 ppm.

<sup>11</sup>B{<sup>1</sup>H} NMR (160 MHz, CD<sub>2</sub>Cl<sub>2</sub>):  $\delta$  = 73 ppm.

HRMS (ESI<sup>+</sup>): *m/z* found: [M+H]<sup>+</sup> 1088.7112; calc. for [C<sub>73</sub>H<sub>88</sub>B<sub>2</sub>N<sub>5</sub>O<sub>2</sub>]<sup>+</sup> 1088.7119 ( $|\Delta|$  = 0.64 ppm).

Elem. Anal. Calc. (%) for C<sub>73</sub>H<sub>87</sub>B<sub>2</sub>N<sub>5</sub>O<sub>2</sub>: C 80.58, H 8.06, N 6.44; found: C 80.65, H 8.24, N 6.53.

**3,6-Bis[4-[bis[4-(*N,N,N*-trimethylammonio)-2,6-xylyl]-boryl]-3,5-xylyl]-9*H*-carbazole tetratriflate **4M****

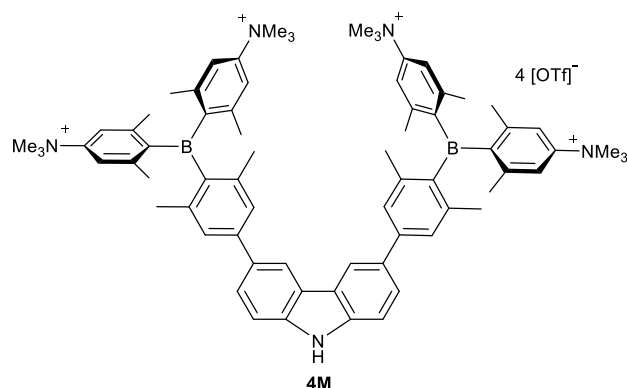

In a soda-lime glass vial, compound **4** (44.0 mg, 40.1  $\mu\text{mol}$ , 1.0 eq.) was dissolved in degassed DCM (6.0 mL). After the addition of MeOTf (20.6  $\mu\text{L}$ , 183  $\mu\text{mol}$ , 4.5 eq.), the reaction mixture was stirred at r.t. for 18 h. The pale yellow precipitate was collected by filtration and washed with Et<sub>2</sub>O (18 mL) to obtain the methylated compound as a pale yellow solid (50.0 mg, 71%). The crude product (50.0 mg, 28.7  $\mu\text{mol}$ , 1.0 eq.) was directly deprotected and therefore dissolved in MeOH (1.0 mL) in a soda-lime glass vial. After the addition of a solution of TfOH (3.0 mL) in MeOH (5.0 mL), the reaction mixture was stirred at r.t. for 1 h. The reaction mixture was quenched with water (8.0 mL) and the precipitate was collected by centrifugation and washed with water until the washing solution was pH neutral. The compound **4M** was isolated as a yellow solid (32.0 mg, 68%).

**<sup>1</sup>H NMR** (500 MHz, CD<sub>2</sub>Cl<sub>2</sub>):  $\delta$  = 8.49 (d,  $J$  = 1.3 Hz, 2H), 7.77 – 7.75 (m, 2H), 7.56 (s, 8H), 7.56 – 7.54 (m, 2H), 7.47 (s, 4H), 3.65 (s, 36H), 2.27 (s, 12H), 2.16 (s, 12H), 2.13 (s, 12H) ppm.

**<sup>13</sup>C{<sup>1</sup>H} NMR** (125 MHz, CD<sub>2</sub>Cl<sub>2</sub>):  $\delta$  = 149.7, 149.5, 146.2, 144.9, 144.4, 144.1, 142.9, 141.9, 132.5, 127.9, 126.1, 125.1, 121.8 (q,  $J$  = 319 Hz), 120.0, 120.0, 119.6, 112.3, 57.5, 23.7, 23.6, 23.4 ppm.

**Solid-State <sup>11</sup>B{<sup>1</sup>H} NMR** (128 MHz): Isotropic chemical shift  $\delta_{\text{iso}}$  = 77.0 ppm, quadrupole coupling constant  $C_Q$  = 4.77 MHz, quadrupolar asymmetry parameter  $\eta_{\text{Quad}}$  = 0.1.

**HRMS** (ESI<sup>+</sup>):  $m/z$  found: [M-2OTf]<sup>2+</sup> 672.8241; calc. for [C<sub>74</sub>H<sub>91</sub>B<sub>2</sub>F<sub>6</sub>N<sub>5</sub>O<sub>6</sub>S<sub>2</sub>]<sup>2+</sup> 672.8245 ( $|\Delta|$  = 0.59 ppm).

**Elem. Anal. Calc.** (%) for C<sub>76</sub>H<sub>91</sub>B<sub>2</sub>F<sub>12</sub>N<sub>5</sub>O<sub>12</sub>S<sub>4</sub>: C 55.51, H 5.58, N 4.26, S 7.80; found: C 53.52, H 5.71, N 4.30, S 7.51.



**2,5-Di-*N*-Boc-3,6-bis[5-[4-[bis[4-(*N,N*-dimethylamino)-2,6-xylyl]boryl]-3,5-xylyl]-2-thienyl]-1,4-diketopyrrolo[3,4-*c*]pyrrole 5**

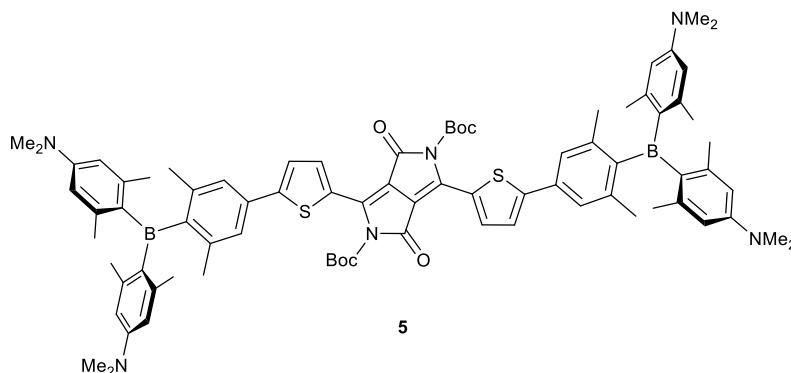

Compound **6** (4.59 g, 8.83 mmol, 2.2 eq.), 2,5-di-*N*-Boc-3,6-di(5-bromo-thien-2-yl)-1,4-diketopyrrolo[3,4-*c*]pyrrole (2.55 g, 3.87 mol, 1.0 eq.) and KOH (1.30 g, 23.2 mmol, 6.0 eq.) were dissolved in a degassed mixture of H<sub>2</sub>O (46 mL) and toluene (93 mL). The reaction mixture was degassed for 15 min and SPhos (479 mg, 1.17 mmol, 30 mol%) and Pd<sub>2</sub>(dba)<sub>3</sub> (277.0 mg, 0.27 mmol, 7 mol%) were added. After heating to 85 °C for 3 d, the aqueous layer was extracted with DCM (7 x 100 mL) and dried over Na<sub>2</sub>SO<sub>4</sub>. The solvent was evaporated and the crude product was purified by automated flash column chromatography (KP-Sil 100g, hexane:ethylacetate 9:1 → 5:1) to obtain compound **5** as a violet solid (1.48 g, 29%).

**<sup>1</sup>H NMR** (500 MHz, CD<sub>2</sub>Cl<sub>2</sub>): δ = 8.23 (d, *J* = 4.2 Hz, 2H), 7.47 (d, *J* = 4.2 Hz, 2H), 7.26 (s, 4H), 6.33 (s, 4H), 6.32 (s, 4H), 2.96 (s, 24H), 2.09 (s, 12H), 2.03 (s, 12H), 1.97 (s, 12H), 1.63 (s, 18H) ppm.

**<sup>13</sup>C{<sup>1</sup>H} NMR** (125 MHz, CD<sub>2</sub>Cl<sub>2</sub>): δ = 159.4, 152.2, 151.8, 151.6, 149.4, 143.4, 142.9, 141.5, 137.2, 135.8, 135.4, 132.8, 128.6, 125.2, 124.1, 111.9, 110.5, 86.1, 40.2, 27.9, 24.1, 23.9, 23.0 ppm.

**Solid-State <sup>11</sup>B{<sup>1</sup>H} NMR** (128 MHz): Isotope chemical shift δ<sub>iso</sub> = 72.5 ppm, quadrupole coupling constant C<sub>Q</sub> = 4.49 MHz, quadrupolar asymmetry parameter η<sub>Quad</sub> = 0.1.

**HRMS** (LIFDI): *m/z* found: [M]<sup>+</sup> 1320.6856; calc. for [C<sub>80</sub>H<sub>94</sub>B<sub>2</sub>N<sub>6</sub>O<sub>6</sub>S<sub>2</sub>]<sup>+</sup> 1320.6857 (|Δ| = 0.08 ppm).

**Elem. Anal. Calc.** (%) for C<sub>80</sub>H<sub>94</sub>B<sub>2</sub>N<sub>6</sub>O<sub>6</sub>S<sub>2</sub>: C 72.72, H 7.17, N 6.36, S 4.85; found: C 72.97, H 7.40, N 6.49, S 4.52.

**3,6-Bis[5-[4-[bis(4-(*N,N,N*-trimethylammonio)-2,6-xylyl]boryl]-3,5-xylyl]-2-thienyl]-1,4-diketopyrrolo[3,4-*c*]pyrrole tetratriflate 5M**

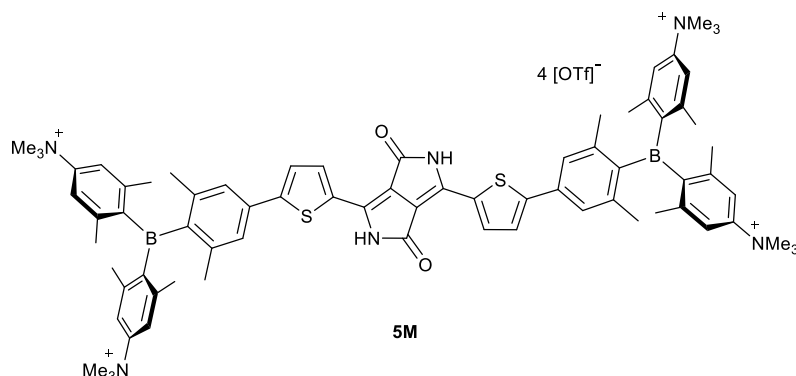

In a soda-lime glass vial, compound **5** (15.0 mg, 11.4  $\mu\text{mol}$ , 1.0 eq.) was dissolved in degassed DCM (2.0 mL). After the addition of MeOTf (5.78  $\mu\text{L}$ , 51.1  $\mu\text{mol}$ , 4.5 eq.), the reaction mixture was stirred at r.t. for 7 h. The violet precipitate was collected by filtration and washed with Et<sub>2</sub>O (6 mL) to obtain the methylated compound as a violet solid (22.0 mg, 97%). The crude product (22.0 mg, 11.1  $\mu\text{mol}$ , 1.0 eq.) was directly deprotected and therefore dissolved in MeOH (0.2 mL) in a borosilicate glass vial. After the addition of a solution of TfOH (0.8 mL) in MeOH (2.0 mL), the reaction mixture was stirred at r.t. for 1.5 h. The reaction mixture was quenched with water (9.0 mL) and the precipitate was collected by centrifugation and washed with water until the washing solution was pH neutral. The compound **5M** was isolated as a violet solid (17.0 mg, 86%).

**<sup>1</sup>H NMR** (500 MHz, CD<sub>3</sub>OD):  $\delta$  = 8.23 (d,  $J$  = 4.1 Hz, 2H), 7.69 (d,  $J$  = 4.1 Hz, 2H), 7.59 (s, 4H), 7.58 (s, 4H), 7.48 (s, 4H), 3.67 (s, 36H), 2.25 (s, 12H), 2.17 (s, 12H), 2.11 (s, 12H) ppm.

**<sup>13</sup>C{<sup>1</sup>H} NMR** (125 MHz, CD<sub>3</sub>OD):  $\delta$  = 163.7, 150.8, 149.8, 149.2, 147.0, 144.9, 144.6, 143.3, 137.9, 137.0, 134.2, 131.7, 126.8, 126.7, 112.8 (q,  $J$  = 319 Hz), 120.2, 120.2, 111.0, 57.5, 23.6, 23.5, 23.4 ppm.

**Solid-State <sup>11</sup>B{<sup>1</sup>H} NMR** (128 MHz): Isotropic chemical shift  $\delta_{\text{iso}}$  = 77.1 ppm, quadrupole coupling constant  $C_Q$  = 4.79 MHz, quadrupolar asymmetry parameter  $\eta_{\text{Quad}}$  = 0.0.

**HRMS** (ESI<sup>+</sup>):  $m/z$  found: [M-4OTf]<sup>4+</sup> 295.1685; calc. for [C<sub>74</sub>H<sub>90</sub>B<sub>2</sub>N<sub>6</sub>O<sub>2</sub>S<sub>2</sub>]<sup>4+</sup> 295.1683 ( $|\Delta|$  = 0.68 ppm).

**Elem. Anal. Calc.** (%) for C<sub>78</sub>H<sub>90</sub>B<sub>2</sub>F<sub>12</sub>N<sub>6</sub>O<sub>14</sub>S<sub>6</sub>: C 52.70, H 5.10, N 4.73, S 10.82; found: C 51.49, H 5.40, N 4.48, S 10.14.

### 3,6-Bis[5-[4-[bis(3,5-xylyl)]-2-thienyl]-1,4-diketopyrrolo[3,4-c]pyrrole 5A

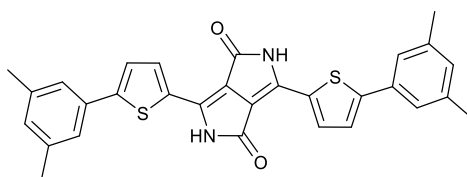

5A

2-(3,5-dimethylphenyl)-4,4,5,5-tetramethyl-1,3,2-dioxaborolane (140 mg, 0.60 mmol, 2.2 eq.), 2,5-di-*N*-Boc-3,6-di(5-bromo-thien-2-yl)-1,4-diketopyrrolo[3,4-c]pyrrole (180 mg, 0.27 mol, 1.0 eq.) and KOH (92.0 mg, 1.64 mmol, 6.0 eq.) were dissolved in a degassed mixture of H<sub>2</sub>O (1.5 mL) and toluene (3 mL). The reaction mixture was degassed for 5 min and SPhos (33 mg, 82.0  $\mu$ mol, 30 mol%) and Pd<sub>2</sub>(dba)<sub>3</sub> (16.6 mg, 16.4  $\mu$ mol, 6 mol%) were added. After heating to 85 °C for 3 d, the aqueous layer was extracted with DCM (3 x 30 mL). The solvent was evaporated and the crude product was purified by automated flash column chromatography (KP-Sil 100g, hexane:ethylacetate 99:1  $\rightarrow$  97:3  $\rightarrow$  95:5  $\rightarrow$  90:10) to obtain the coupled compound as a violet solid (100 mg, 52%). The crude product (50.0 mg, 70.4  $\mu$ mol, 1.0 eq.) was directly deprotected and therefore dissolved in DCM (1.0 mL) in a borosilicate glass vial. After the addition of a solution of TfOH (0.2 mL) in DCM (1.0 mL), the reaction mixture was stirred at r.t. for 1 h. The precipitate was collected by centrifugation and washed with water until the washing solution was pH neutral. The compound **5A** was isolated as a violet solid (30.0 mg, 84%).

<sup>1</sup>H NMR (500 MHz, d<sup>6</sup>-DMSO):  $\delta$  = 11.23 (s, 2H), 8.17 (d, *J* = 4.0 Hz, 2H), 7.68 (d, *J* = 4.0 Hz, 2H), 7.36 (s, 4H), 7.05 (s, 2H), 2.34 (s, 12H) ppm.

<sup>13</sup>C{<sup>1</sup>H} NMR (125 MHz, d<sup>6</sup>-DMSO):  $\delta$  = 161.6, 149.4, 138.6, 135.5, 132.7, 132.5, 130.5, 129.5, 125.2, 123.6, 109.1, 20.9 ppm.

HRMS (ASAP<sup>-</sup>): *m/z* found: [M]<sup>-</sup> 508.1281; calc. for [C<sub>30</sub>H<sub>24</sub>N<sub>2</sub>O<sub>2</sub>S<sub>2</sub>]<sup>-</sup> 508.1285 ( $|\Delta|$  = 0.79 ppm).

Elem. Anal. Calc. (%) for C<sub>30</sub>H<sub>24</sub>N<sub>2</sub>O<sub>2</sub>S<sub>2</sub>: C 70.84, H 4.76, N 5.51, S 12.61; found: C 66.23, H 4.95, N 5.37, S 11.73.

## Linear Optical Properties

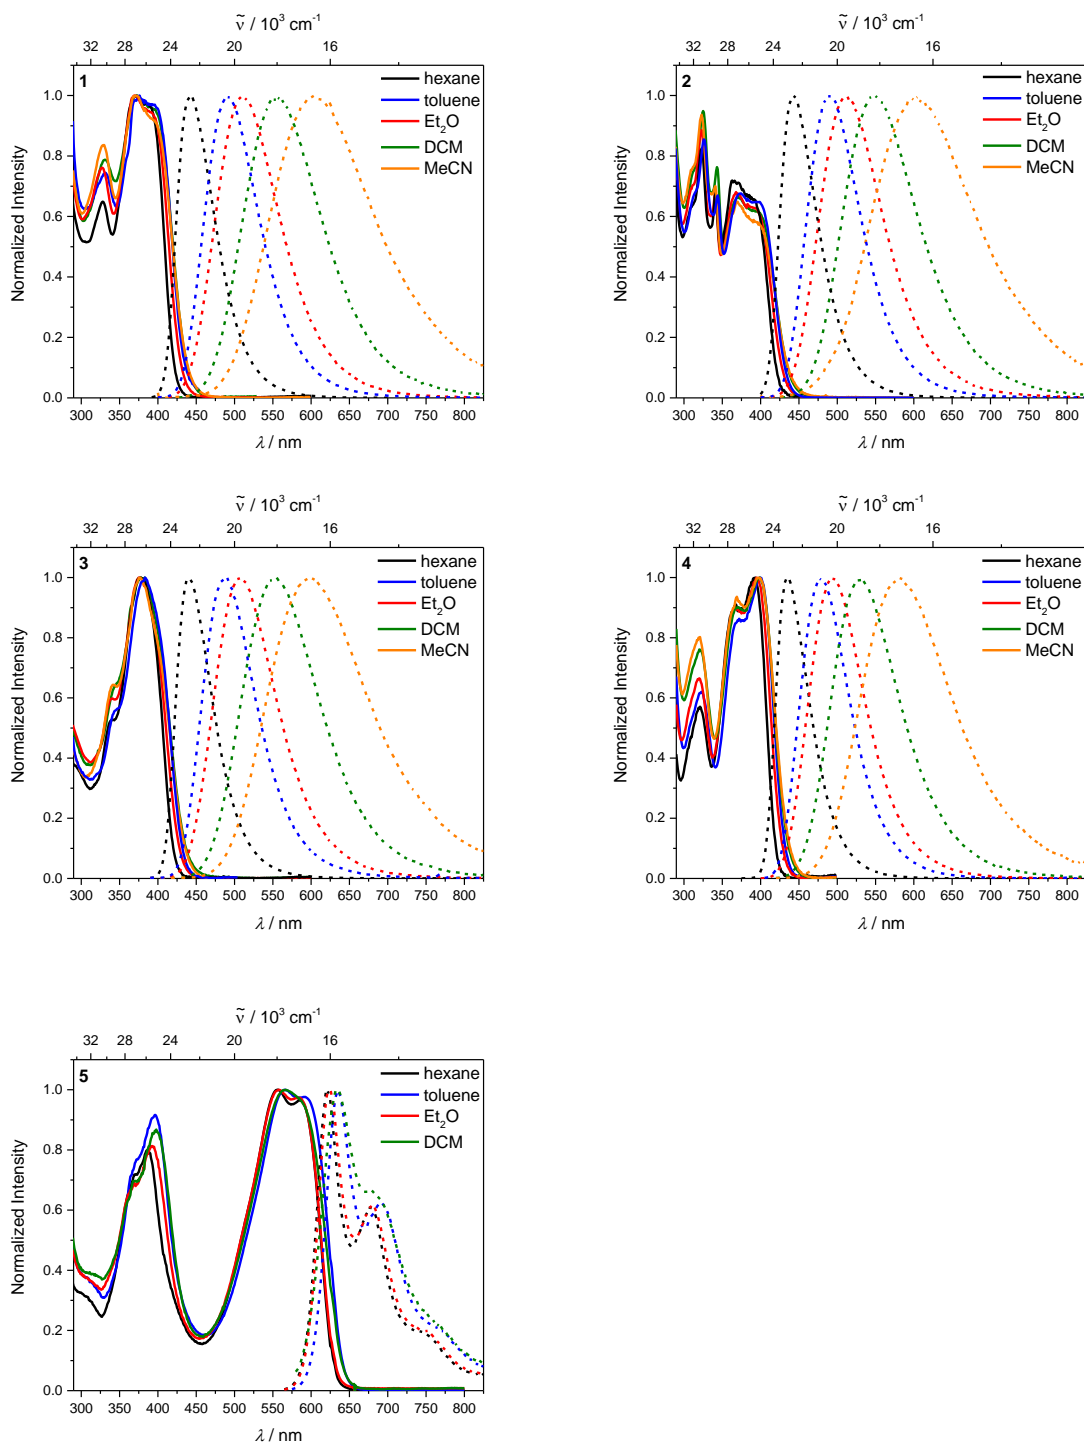

**Figure S1.** Absorption and emission spectra of **1** (first row, left), **2** (first row, right), **3** (second row, left), **4** (second row, right) and **5** (third row, left) in various solvents (hexane: black, toluene: blue, diethylether: red, dichloromethane: green, MeCN: orange).

**Table S1.** Photophysical data for compounds **1-5** in various solvents.

|          | solvent           | $\lambda_{\text{abs}} / \text{nm}$ | $\epsilon / \text{M}^{-1} \text{cm}^{-1}$ | $\lambda_{\text{em}} / \text{nm}$ | Stokes shift / $\text{cm}^{-1}$ | $\Phi$ | $\tau / \text{ns}$ | $k_r / 10^8 \text{s}^{-1}$ | $k_{\text{nr}} / 10^8 \text{s}^{-1}$ |
|----------|-------------------|------------------------------------|-------------------------------------------|-----------------------------------|---------------------------------|--------|--------------------|----------------------------|--------------------------------------|
| <b>1</b> | hexane            | 372                                | 69 000                                    | 442                               | 4 300                           | 0.14   | 1.5                | 0.9                        | 5.8                                  |
|          | toluene           | 376                                |                                           | 493                               | 6 300                           | 0.20   | 3.4                | 0.6                        | 2.3                                  |
|          | Et <sub>2</sub> O | 369                                |                                           | 511                               | 7 500                           | 0.24   | 5.9                | 0.4                        | 1.3                                  |
|          | DCM               | 373                                |                                           | 556                               | 8 800                           | 0.30   | 8.8                | 0.3                        | 0.8                                  |
|          | MeCN              | 371                                |                                           | 603                               | 10 400                          | 0.08   | 2.5                | 0.3                        | 3.7                                  |
| <b>2</b> | hexane            | 366                                | 70 000                                    | 445                               | 4 900                           | 0.14   | 1.5                | 0.9                        | 5.8                                  |
|          | toluene           | 372                                |                                           | 490                               | 6 500                           | 0.23   | 3.6                | 0.6                        | 2.2                                  |
|          | Et <sub>2</sub> O | 368                                |                                           | 511                               | 7 600                           | 0.27   | 6.4                | 0.4                        | 1.2                                  |
|          | DCM               | 371                                |                                           | 545                               | 8 600                           | 0.34   | 9.6                | 0.4                        | 0.6                                  |
|          | MeCN              | 370                                |                                           | 603                               | 10 400                          | 0.08   | 2.9                | 0.3                        | 3.1                                  |
| <b>3</b> | hexane            | 378                                | 82 000                                    | 441                               | 3 800                           | 0.16   | 1.5                | 1.1                        | 5.6                                  |
|          | toluene           | 383                                |                                           | 491                               | 5 700                           | 0.21   | 3.3                | 0.6                        | 2.4                                  |
|          | Et <sub>2</sub> O | 375                                |                                           | 509                               | 7 000                           | 0.23   | 6.5                | 0.4                        | 1.1                                  |
|          | DCM               | 383                                |                                           | 555                               | 8 100                           | 0.29   | 8.1                | 0.4                        | 0.8                                  |
|          | MeCN              | 377                                |                                           | 596                               | 9 700                           | 0.09   | 3.3                | 0.3                        | 2.7                                  |
| <b>4</b> | hexane            | 393                                | 56 000                                    | 436                               | 2 500                           | 0.12   | 1.4                | 0.9                        | 6.2                                  |
|          | toluene           | 399                                |                                           | 479                               | 4 200                           | 0.23   | 3.3                | 0.7                        | 2.3                                  |
|          | Et <sub>2</sub> O | 395                                |                                           | 495                               | 5 100                           | 0.25   | 5.0                | 0.5                        | 2.0                                  |
|          | DCM               | 399                                |                                           | 530                               | 6 200                           | 0.41   | 10.3               | 0.4                        | 0.6                                  |
|          | MeCN              | 398                                |                                           | 581                               | 7 900                           | 0.15   | 6.3                | 0.2                        | 1.4                                  |
| <b>5</b> | hexane            | 557                                | 59 000                                    | 622                               | 1 900                           | 0.57   | 2.4                | 2.4                        | 1.8                                  |
|          | toluene           | 566                                |                                           | 635                               | 1 900                           | 0.55   | 2.3                | 2.4                        | 1.9                                  |
|          | Et <sub>2</sub> O | 558                                |                                           | 624                               | 1 900                           | 0.40   | 2.0                | 2.0                        | 3.0                                  |
|          | DCM               | 568                                |                                           | 635                               | 1 900                           | 0.004  | 2.3                | 0.02                       | 4.3                                  |

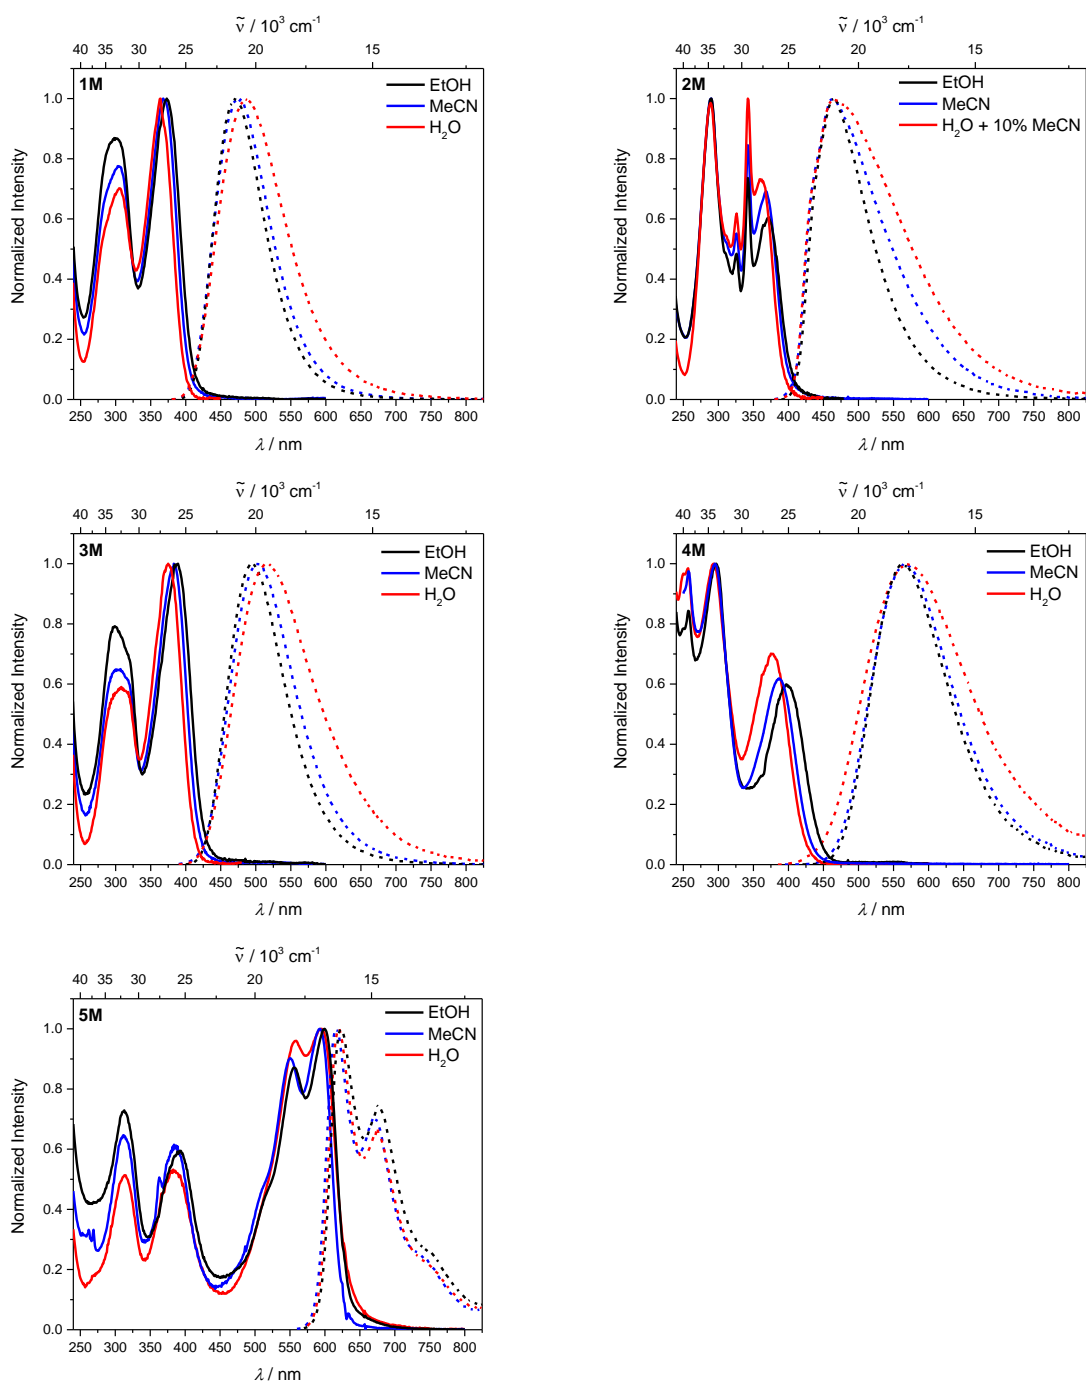

**Figure S2.** Absorption and emission spectra of **1M** (first row, left), **2M** (first row, right), **3M** (second row, left), **4M** (second row, right) and **5M** (third row, left) in various solvents (ethanol: black, acetonitrile: blue, water: red).

## TD-DFT Calculations

**Table S2.** Lowest energy singlet electronic transitions of **1** in hexane solution. H = HOMO; L = LUMO

| State           | Symmetry | <i>E</i> (eV) | $\lambda$ (nm) | <i>f</i> | Major (> 10%) contributions                                         |
|-----------------|----------|---------------|----------------|----------|---------------------------------------------------------------------|
| S <sub>1</sub>  | B        | 3.50          | 354            | 0.054    | H-1 → L+1 (44%), H → L (38%)                                        |
| S <sub>2</sub>  | A        | 3.50          | 354            | 0.736    | H-1 → L (38%), H → L+1 (44%),                                       |
| S <sub>3</sub>  | B        | 3.70          | 335            | 1.496    | H-4 → L (11%), H-3 → L+1 (29%), H-2 → L (37%)                       |
| S <sub>4</sub>  | A        | 3.77          | 329            | 0.000    | H-3 → L (33%), H-2 → L+1 (42%)                                      |
| S <sub>5</sub>  | B        | 4.19          | 296            | 0.778    | H-4 → L (55%), H-3 → L+1 (15%)                                      |
| S <sub>6</sub>  | A        | 4.37          | 284            | 0.000    | H-5 → L (31%), H-4 → L+1 (42%)                                      |
| S <sub>7</sub>  | A        | 4.59          | 270            | 0.001    | H-7 → L+1 (29%), H-6 → L (25%)                                      |
| S <sub>8</sub>  | B        | 4.59          | 270            | 0.008    | H-7 → L (25%), H-6 → L+1 (29%)                                      |
| S <sub>9</sub>  | B        | 4.62          | 269            | 0.381    | H-9 → L+1 (12%), H-8 → L (14%), H-5 → L+1 (14%),<br>H-4 → L+2 (22%) |
| S <sub>10</sub> | A        | 4.62          | 268            | 0.055    | H-11 → L+1 (30%), H-10 → L (39%)                                    |

**Table S3.** Lowest energy singlet electronic transitions of **2** in hexane solution. H = HOMO; L = LUMO

| State           | Symmetry | <i>E</i> (eV) | $\lambda$ (nm) | <i>f</i> | Major (> 10%) contributions                          |
|-----------------|----------|---------------|----------------|----------|------------------------------------------------------|
| S <sub>1</sub>  | A        | 3.50          | 355            | 0.352    | H-1 → L+1 (11%), H → L+1 (29%), H → L+2 (41%)        |
| S <sub>2</sub>  | A        | 3.50          | 355            | 0.427    | H-1 → L+1 (25%), H-1 → L+2 (46%), H → L+1<br>(11%)   |
| S <sub>3</sub>  | A        | 3.71          | 334            | 0.000    | H-5 → L (41%), H-4 → L+1 (25%), H-4 → L+3<br>(20%)   |
| S <sub>4</sub>  | A        | 3.72          | 333            | 1.533    | H-3 → L+2 (30%), H-2 → L+1 (36%)                     |
| S <sub>5</sub>  | A        | 3.78          | 328            | 0.004    | H-3 → L+1 (33%), H-2 → L+2 (39%)                     |
| S <sub>6</sub>  | A        | 3.92          | 317            | 0.345    | H-4 → L (85%)                                        |
| S <sub>7</sub>  | A        | 4.27          | 290            | 1.072    | H-6 → L+2 (16%), H-5 → L+1 (51%), H-3 → L+2<br>(12%) |
| S <sub>8</sub>  | A        | 4.39          | 282            | 0.000    | H-6 → L+1 (31%), H-5 → L+2 (41%)                     |
| S <sub>9</sub>  | A        | 4.55          | 273            | 0.263    | H-5 → L (41%), H-4 → L+1 (39%), H-4 → L+3<br>(12%)   |
| S <sub>10</sub> | A        | 4.59          | 270            | 0.003    | H-7 → L+1 (23%), H-7 → L+2 (32%)                     |

**Table S4.** Lowest energy singlet electronic transitions of **3** in hexane solution. H = HOMO; L = LUMO

| State           | Symmetry | <i>E</i> (eV) | $\lambda$ (nm) | <i>f</i> | Major (> 10%) contributions                                       |
|-----------------|----------|---------------|----------------|----------|-------------------------------------------------------------------|
| S <sub>1</sub>  | A        | 3.49          | 354            | 0.384    | H-1 → L (38%), H-1 → L+1 (43%), H-1 → L+2 (10%)                   |
| S <sub>2</sub>  | A        | 3.50          | 354            | 0.410    | H → L (36%), H → L+1 (44%), H → L+2 (11%)                         |
| S <sub>3</sub>  | A        | 3.67          | 338            | 1.788    | H-3 → L+1 (23%), H-2 → L (46%)                                    |
| S <sub>4</sub>  | A        | 3.77          | 329            | 0.025    | H-3 → L (31%), H-2 → L+1 (43%)                                    |
| S <sub>5</sub>  | A        | 4.09          | 303            | 0.590    | H-4 → L (54%), H-3 → L+1 (19%), H-2 → L+2 (13%)                   |
| S <sub>6</sub>  | A        | 4.34          | 286            | 0.007    | H-5 → L (28%), H-4 → L+1 (45%)                                    |
| S <sub>7</sub>  | A        | 4.54          | 273            | 0.268    | H-13 → L (12%), H-5 → L+1 (26%), H-4 → L+2 (28%), H-2 → L+2 (10%) |
| S <sub>8</sub>  | A        | 4.59          | 270            | 0.008    | H-7 → L (23%), H-7 → L+1 (26%)                                    |
| S <sub>9</sub>  | A        | 4.59          | 270            | 0.004    | H-6 → L (24%), H-6 → L+1 (29%)                                    |
| S <sub>10</sub> | A        | 4.61          | 269            | 0.030    | H-10 → L (14%), H-10 → L+1 (10%), H-9 → L (20%), H-9 → L+1 (15%)  |

**Table S5.** Lowest energy singlet electronic transitions of **4** in hexane solution. H = HOMO; L = LUMO

| State           | Symmetry | <i>E</i> (eV) | $\lambda$ (nm) | <i>f</i> | Major (> 10%) contributions                     |
|-----------------|----------|---------------|----------------|----------|-------------------------------------------------|
| S <sub>1</sub>  | A        | 3.51          | 353            | 0.207    | H-1 → L (76%)                                   |
| S <sub>2</sub>  | A        | 3.52          | 352            | 0.581    | H → L+1 (76%)                                   |
| S <sub>3</sub>  | A        | 3.75          | 331            | 0.571    | H-3 → L (34%), H-2 → L+1 (27%)                  |
| S <sub>4</sub>  | A        | 3.78          | 328            | 0.438    | H-3 → L (35%), H-2 → L+1 (42%)                  |
| S <sub>5</sub>  | A        | 4.33          | 287            | 0.233    | H-5 → L+1 (17%), H-4 → L (29%), H-4 → L+1 (11%) |
| S <sub>6</sub>  | A        | 4.36          | 284            | 0.157    | H-5 → L (21%), H-4 → L (32%)                    |
| S <sub>7</sub>  | A        | 4.45          | 279            | 0.061    | H-4 → L+2 (63%)                                 |
| S <sub>8</sub>  | A        | 4.60          | 270            | 0.002    | H-8 → L (55%)                                   |
| S <sub>9</sub>  | A        | 4.60          | 269            | 0.003    | H-7 → L+1 (56%)                                 |
| S <sub>10</sub> | A        | 4.64          | 267            | 0.022    | H-9 → L+1 (58%)                                 |

**Table S6.** Lowest energy singlet electronic transitions of **5** in hexane solution. H = HOMO; L = LUMO

| State           | Symmetry | <i>E</i> (eV) | $\lambda$ (nm) | <i>f</i> | Major (> 10%) contributions                                      |
|-----------------|----------|---------------|----------------|----------|------------------------------------------------------------------|
| S <sub>1</sub>  | A        | 2.31          | 537            | 1.739    | H → L (94%)                                                      |
| S <sub>2</sub>  | A        | 3.35          | 370            | 0.294    | H-2 → L (33%), H-2 → L+1 (20%), H-2 → L+2 (27%), H-2 → L+3 (10%) |
| S <sub>3</sub>  | A        | 3.35          | 370            | 0.116    | H-5 → L (34%), H → L+1 (33%)                                     |
| S <sub>4</sub>  | A        | 3.38          | 367            | 0.260    | H-1 → L (28%), H-2 → L+1 (24%), H-2 → L+2 (26%), H-2 → L+3 (13%) |
| S <sub>5</sub>  | A        | 3.58          | 346            | 0.606    | H-6 → L (12%), H-4 → L (28%), H-4 → L+2 (12%), H-3 → L+1 (12%)   |
| S <sub>6</sub>  | A        | 3.68          | 337            | 0.012    | H-3 → L (26%), H → L+1 (24%), H → L+3 (15%)                      |
| S <sub>7</sub>  | A        | 3.75          | 331            | 0.015    | H-5 → L (43%), H → L+1 (15%)                                     |
| S <sub>8</sub>  | A        | 3.80          | 326            | 0.122    | H-1 → L (68%), H-1 → L+2 (12%), H-1 → L+3 (10%)                  |
| S <sub>9</sub>  | A        | 3.81          | 325            | 0.161    | H-2 → L (62%), H-2 → L+2 (17%), H-2 → L+3 (10%)                  |
| S <sub>10</sub> | A        | 3.90          | 318            | 0.451    | H-6 → L (41%), H-4 → L (17%)                                     |



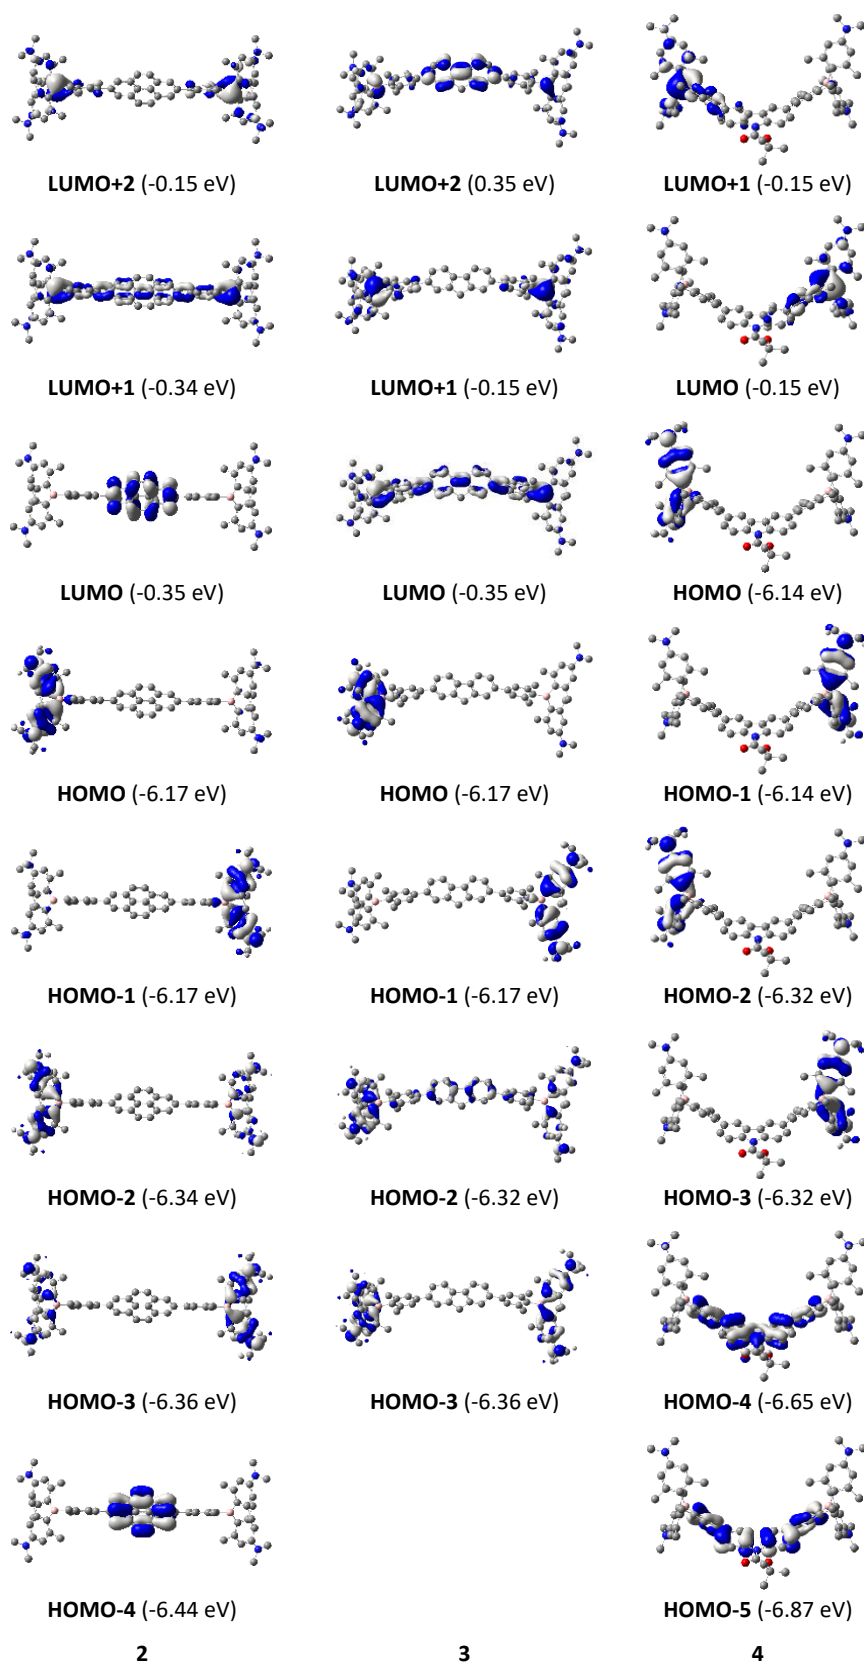

**Figure S3.** DFT (CAM-B3LYP/6-31 G(d))-calculated frontier orbitals for **2-4**. Hydrogen atoms are omitted for clarity. Surface isovalue:  $\pm 0.03 [e a_0^{-3}]^{1/2}$ .

**Table S7.** Lowest energy singlet electronic transitions of **1M** in water. H = HOMO; L = LUMO<sup>[a]</sup>

| State                | Symmetry             | <i>E</i> (eV) | $\lambda$ (nm) | <i>f</i>     | Major (> 10%) contributions                                                        |
|----------------------|----------------------|---------------|----------------|--------------|------------------------------------------------------------------------------------|
| S <sub>1</sub>       | A                    | 3.66          | 338            | 1.709        | H-1 → L+1 (28%), H → L (53%)                                                       |
| <i>S<sub>1</sub></i> | <i>A<sub>u</sub></i> | <i>3.63</i>   | <i>341</i>     | <i>1.857</i> | <i>H-1 → L+1 (26%), H → L (56%)</i>                                                |
| S <sub>2</sub>       | A                    | 3.80          | 326            | 0.000        | H-1 → L (38%), H → L+1 (40%)                                                       |
| <i>S<sub>2</sub></i> | <i>A<sub>g</sub></i> | <i>3.80</i>   | <i>326</i>     | <i>0.000</i> | <i>H-1 → L (37%), H → L+1 (40%)</i>                                                |
| S <sub>3</sub>       | A                    | 4.18          | 296            | 0.013        | H-3 → L+1 (31%), H-2 → L (36%)                                                     |
| <i>S<sub>3</sub></i> | <i>A<sub>g</sub></i> | <i>4.18</i>   | <i>297</i>     | <i>0.000</i> | <i>H-3 → L (36%), H-2 → L+1 (31%)</i>                                              |
| S <sub>4</sub>       | A                    | 4.18          | 296            | 0.023        | H-3 → L (36%), H-2 → L+1 (31%)                                                     |
| <i>S<sub>4</sub></i> | <i>A<sub>u</sub></i> | <i>4.18</i>   | <i>297</i>     | <i>0.036</i> | <i>H-3 → L+1 (31%), H-2 → L (36%)</i>                                              |
| S <sub>5</sub>       | A                    | 4.30          | 288            | 0.001        | H-6 → L (17%), H-5 → L+1 (26%), H-4 → L (13%),<br>H-3 → L (10%), H-2 → L+1 (12%)   |
| <i>S<sub>5</sub></i> | <i>A<sub>g</sub></i> | <i>4.30</i>   | <i>288</i>     | <i>0.000</i> | <i>H-6 → L+1 (23%), H-5 → L (22%), H-3 → L (12%),<br/>H-2 → L+1 (10%)</i>          |
| S <sub>6</sub>       | A                    | 4.30          | 288            | 0.289        | H-6 → L+1 (17%), H-5 → L (26%), H-4 → L+1 (13%),<br>H-3 → L+1 (10%), H-2 → L (12%) |
| <i>S<sub>6</sub></i> | <i>A<sub>u</sub></i> | <i>4.30</i>   | <i>288</i>     | <i>0.292</i> | <i>H-6 → L (23%), H-5 → L+1 (23%), H-2 → L (12%)</i>                               |
| S <sub>7</sub>       | A                    | 4.47          | 277            | 0.737        | H-4 → L (10%), H → L+2 (34%)                                                       |
| <i>S<sub>7</sub></i> | <i>A<sub>u</sub></i> | <i>4.39</i>   | <i>282</i>     | <i>0.649</i> | <i>H-4 → L (12%), H-1 → L+1 (12%), H → L+2 (39%),</i>                              |
| S <sub>8</sub>       | A                    | 4.64          | 267            | 0.000        | H-7 → L (28%), H-6 → L+1 (11%), H-4 → L+1 (20%)                                    |
| <i>S<sub>8</sub></i> | <i>A<sub>g</sub></i> | <i>4.64</i>   | <i>267</i>     | <i>0.000</i> | <i>H-8 → L (24%), H-4 → L+1 (24%)</i>                                              |

<sup>[a]</sup> black: without symmetry constraints, red: in C<sub>i</sub> symmetry

**Table S8.** Lowest energy singlet electronic transitions of **2M** in water. H = HOMO; L = LUMO<sup>[a]</sup>

| State                | Symmetry             | <i>E</i> (eV) | $\lambda$ (nm) | <i>f</i>     | Major (> 10%) contributions                                                        |
|----------------------|----------------------|---------------|----------------|--------------|------------------------------------------------------------------------------------|
| S <sub>1</sub>       | A                    | 3.65          | 339            | 0.004        | H-1 → L+2 (29%), H → L (33%), H → L+3 (28%)                                        |
| <i>S<sub>1</sub></i> | <i>A<sub>u</sub></i> | <i>3.51</i>   | <i>354</i>     | <i>0.005</i> | <i>H-1 → L+2 (27%), H → L (39%), H → L+3 (25%)</i>                                 |
| S <sub>2</sub>       | A                    | 3.69          | 335            | 1.733        | H-2 → L+1 (30%), H-1 → L (52%)                                                     |
| <i>S<sub>2</sub></i> | <i>A<sub>u</sub></i> | <i>3.58</i>   | <i>347</i>     | <i>1.801</i> | <i>H-2 → L+1 (24%), H-1 → L (61%)</i>                                              |
| S <sub>3</sub>       | A                    | 3.81          | 325            | 0.012        | H-2 → L (38%), H-1 → L+1 (39%)                                                     |
| <i>S<sub>3</sub></i> | <i>A<sub>g</sub></i> | <i>3.75</i>   | <i>330</i>     | <i>0.000</i> | <i>H-2 → L (37%), H-1 → L+1 (43%)</i>                                              |
| S <sub>4</sub>       | A                    | 3.92          | 316            | 0.562        | H → L+2 (87%)                                                                      |
| <i>S<sub>4</sub></i> | <i>A<sub>u</sub></i> | <i>3.86</i>   | <i>321</i>     | <i>0.753</i> | <i>H → L+2 (86%)</i>                                                               |
| S <sub>5</sub>       | A                    | 4.16          | 298            | 0.021        | H-3 → L (38%), H-3 → L+1 (27%)                                                     |
| <i>S<sub>5</sub></i> | <i>A<sub>g</sub></i> | <i>4.13</i>   | <i>300</i>     | <i>0.000</i> | <i>H-4 → L+1 (30%), H-3 → L (38%)</i>                                              |
| S <sub>6</sub>       | A                    | 4.18          | 297            | 0.016        | H-4 → L (32%), H-4 → L+1 (32%)                                                     |
| <i>S<sub>6</sub></i> | <i>A<sub>u</sub></i> | <i>4.15</i>   | <i>299</i>     | <i>0.034</i> | <i>H-4 → L (38%), H-3 → L+1 (31%)</i>                                              |
| S <sub>7</sub>       | A                    | 4.30          | 288            | 0.119        | H-7 → L (12%), H-6 → L (14%), H-6 → L+1 (14%),<br>H-3 → L (12%)                    |
| <i>S<sub>7</sub></i> | <i>A<sub>g</sub></i> | <i>4.28</i>   | <i>290</i>     | <i>0.000</i> | <i>H-7 → L+1 (12%), H-6 → L (25%), H-5 → L+1 (17%),<br/>H → L+1 (18%)</i>          |
| S <sub>8</sub>       | A                    | 4.31          | 288            | 0.136        | H-7 → L+1 (11%), H-6 → L (11%), H-5 → L+1 (10%),<br>H-4 → L (11%), H-4 → L+1 (10%) |
| <i>S<sub>8</sub></i> | <i>A<sub>u</sub></i> | <i>4.29</i>   | <i>289</i>     | <i>0.086</i> | <i>H-6 → L+1 (19%), H-5 → L (13%), H-1 → L+2 (21%),<br/>H → L (16%)</i>            |

<sup>[a]</sup> black: without symmetry constraints, red: in C<sub>i</sub> symmetry

**Table S9.** Lowest energy singlet electronic transitions of **3M** in water. H = HOMO; L = LUMO

| State          | Symmetry | <i>E</i> (eV) | $\lambda$ (nm) | <i>f</i> | Major (> 10%) contributions                     |
|----------------|----------|---------------|----------------|----------|-------------------------------------------------|
| S <sub>1</sub> | A        | 3.53          | 351            | 1.905    | H-1 → L+1 (21%), H → L (60%)                    |
| S <sub>2</sub> | A        | 3.74          | 332            | 0.023    | H-5 → L+1 (11%), H-1 → L (34%), H-1 → L+1 (44%) |
| S <sub>3</sub> | A        | 4.16          | 298            | 0.018    | H-2 → L (32%), H-2 → L+1 (24%)                  |
| S <sub>4</sub> | A        | 4.17          | 297            | 0.017    | H-3 → L (28%), H-3 → L+1 (24%)                  |
| S <sub>5</sub> | A        | 4.30          | 289            | 0.459    | H-5 → L (18%), H-1 → L+1 (16%), H → L+2 (40%)   |
| S <sub>6</sub> | A        | 4.30          | 288            | 0.124    | H-7 → L (10%), H-6 → L (16%), H-6 → L+1 (27%)   |
| S <sub>7</sub> | A        | 4.31          | 288            | 0.179    | H-7 → L (18%), H-7 → L+1 (23%), H-6 → L (10%)   |
| S <sub>8</sub> | A        | 4.62          | 269            | 0.005    | H-8 → L (22%), H-5 → L+1 (22%), H → L+1 (15%)   |

**Table S10.** Lowest energy singlet electronic transitions of **4M** in water. H = HOMO; L = LUMO

| State          | Symmetry | <i>E</i> (eV) | $\lambda$ (nm) | <i>f</i> | Major (> 10%) contributions                                  |
|----------------|----------|---------------|----------------|----------|--------------------------------------------------------------|
| S <sub>1</sub> | A        | 3.58          | 346            | 1.113    | H-5 → L (11%), H-2 → L+1 (12%), H-1 → L+1 (16%), H → L (48%) |
| S <sub>2</sub> | A        | 3.70          | 335            | 0.298    | H-5 → L+1 (15%), H-2 → L (14%), H-1 → L (20%), H → L+1 (40%) |
| S <sub>3</sub> | A        | 4.19          | 296            | 0.013    | H-3 → L (41%), H-3 → L+1 (23%)                               |
| S <sub>4</sub> | A        | 4.20          | 296            | 0.019    | H-4 → L (27%), H-4 → L+1 (34%)                               |
| S <sub>5</sub> | A        | 4.23          | 293            | 0.021    | H → L+2 (69%)                                                |
| S <sub>6</sub> | A        | 4.32          | 287            | 0.109    | H-6 → L (27%), H-6 → L+1 (21%)                               |
| S <sub>7</sub> | A        | 4.32          | 287            | 0.178    | H-7 → L (17%), H-7 → L+1 (31%)                               |
| S <sub>8</sub> | A        | 4.40          | 282            | 0.030    | H-5 → L (19%), H → L (21%), H → L+5 (10%)                    |

**Table S11.** Lowest energy singlet electronic transitions of **5M** in water. H = HOMO; L = LUMO<sup>[a]</sup>

| State                 | Symmetry             | <i>E</i> (eV) | $\lambda$ (nm) | <i>f</i>     | Major (> 10%) contributions                          |
|-----------------------|----------------------|---------------|----------------|--------------|------------------------------------------------------|
| S <sub>1</sub>        | A                    | 2.28          | 544            | 1.802        | H → L (93%)                                          |
| <i>S</i> <sub>1</sub> | <i>A<sub>u</sub></i> | <i>2.33</i>   | <i>532</i>     | <i>1.596</i> | <i>H → L (94%)</i>                                   |
| S <sub>2</sub>        | A                    | 3.29          | 376            | 0.138        | H-1 → L (22%), H → L+1 (53%), H → L+3 (10%)          |
| <i>S</i> <sub>2</sub> | <i>A<sub>g</sub></i> | <i>3.36</i>   | <i>369</i>     | <i>0.000</i> | <i>H-1 → L (25%), H → L+1 (45%), H → L+3 (11%)</i>   |
| S <sub>3</sub>        | A                    | 3.57          | 347            | 0.777        | H-2 → L (28%), H-1 → L+1 (23%), H → L+2 (34%)        |
| <i>S</i> <sub>3</sub> | <i>A<sub>u</sub></i> | <i>3.59</i>   | <i>345</i>     | <i>0.917</i> | <i>H-2 → L (26%), H-1 → L+1 (24%), H → L+2 (32%)</i> |
| S <sub>4</sub>        | A                    | 3.72          | 333            | 0.009        | H-1 → L (54%), H → L+1 (19%)                         |
| <i>S</i> <sub>4</sub> | <i>A<sub>g</sub></i> | <i>3.77</i>   | <i>329</i>     | <i>0.000</i> | <i>H-1 → L (51%), H → L+1 (20%)</i>                  |
| S <sub>5</sub>        | A                    | 3.92          | 317            | 0.030        | H-15 → L (23%), H-13 → L (28%)                       |
| <i>S</i> <sub>5</sub> | <i>A<sub>g</sub></i> | <i>3.90</i>   | <i>318</i>     | <i>0.000</i> | <i>H-16 → L (27%), H-13 → L (29%), H → L+3 (10%)</i> |
| S <sub>6</sub>        | A                    | 3.96          | 313            | 0.243        | H-2 → L (43%), H → L+2 (25%)                         |
| <i>S</i> <sub>6</sub> | <i>A<sub>u</sub></i> | <i>3.96</i>   | <i>313</i>     | <i>0.355</i> | <i>H-2 → L (53%), H → L+2 (24%)</i>                  |
| S <sub>7</sub>        | A                    | 4.03          | 308            | 0.001        | H-1 → L+2 (14%), H → L+3 (25%)                       |
| <i>S</i> <sub>7</sub> | <i>A<sub>g</sub></i> | <i>4.00</i>   | <i>310</i>     | <i>0.000</i> | <i>H-1 → L+2 (18%), H → L+3 (33%)</i>                |
| S <sub>8</sub>        | A                    | 4.05          | 306            | 0.011        | H-3 → L (36%), H-3 → L+1 (35%), H-3 → L+2 (13%)      |
| <i>S</i> <sub>8</sub> | <i>A<sub>u</sub></i> | <i>4.04</i>   | <i>307</i>     | <i>0.007</i> | <i>H-15 → L (78%)</i>                                |

<sup>[a]</sup> black: without symmetry constraints, red: in C<sub>i</sub> symmetry

**Table S12.** Selected angles (°) for **1M-5M** in the  $S_0$  states. Calculations were performed by using the B3LYP density functional and the 6-31G(d) basis set.

| angles                                 | 1M     | 2M     | 3M     | 4M     | 5M     |
|----------------------------------------|--------|--------|--------|--------|--------|
| ∠ B1C <sub>3</sub> -xylyl (terminal)   | 54.005 | 53.653 | 53.693 | 54.050 | 53.626 |
|                                        | 54.358 | 53.264 | 53.700 | 54.602 | 53.754 |
| ∠ B1C <sub>3</sub> -xylyl (central)    | 44.328 | 44.441 | 44.399 | 43.330 | 44.023 |
| ∠ xylyl (central)-aryl1                | 36.558 | 36.084 | 35.580 | 38.267 | 14.634 |
| ∠ aryl1-aryl2                          | 37.464 | 0.286  | 0.863  | 2.240  | 3.545  |
| ∠ aryl2-aryl3                          |        |        |        |        | 1.993  |
| ∠ aryl2/3-xylyl (central)              | 36.557 | 37.100 | 33.891 | 40.320 | 16.020 |
| ∠ xylyl (central)-B2C <sub>3</sub>     | 44.338 | 43.858 | 44.598 | 44.783 | 44.020 |
| ∠ xylyl (terminal)- B2C <sub>3</sub> - | 54.357 | 54.053 | 53.347 | 54.203 | 54.191 |
|                                        | 53.993 | 54.054 | 53.822 | 54.159 | 53.139 |

## Two-Photon Absorption

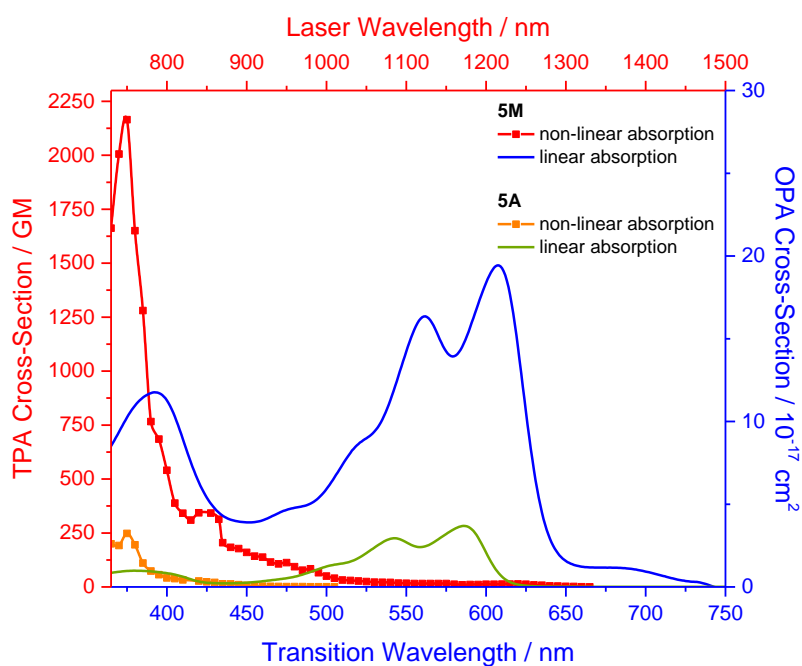

**Figure S4.** Two-photon absorption spectra of **5M** (red) and **5A** (orange) and one-photon absorption spectra of **5M** (blue) and **5A** (green) in DMSO.

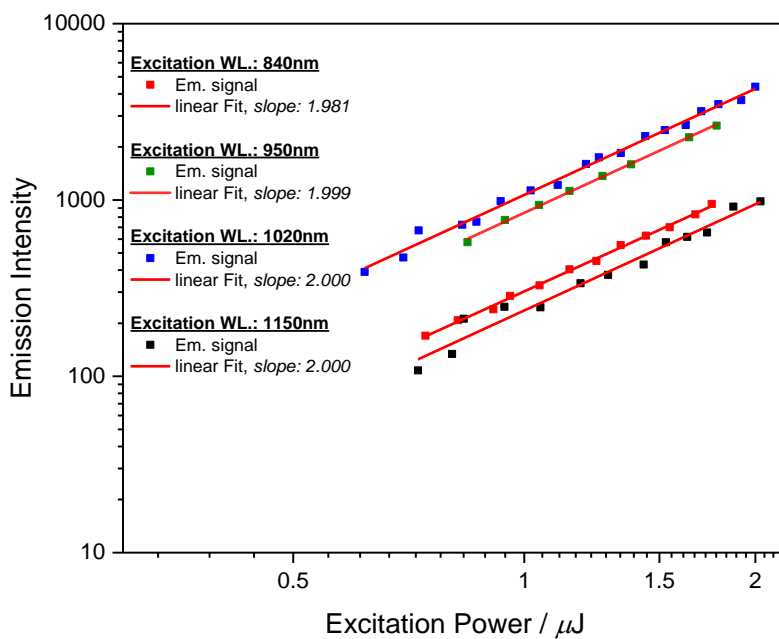

**Figure S5.** Power dependence of the emission intensity of **5M** in MeCN at selected excitation wavelengths.

## Imaging

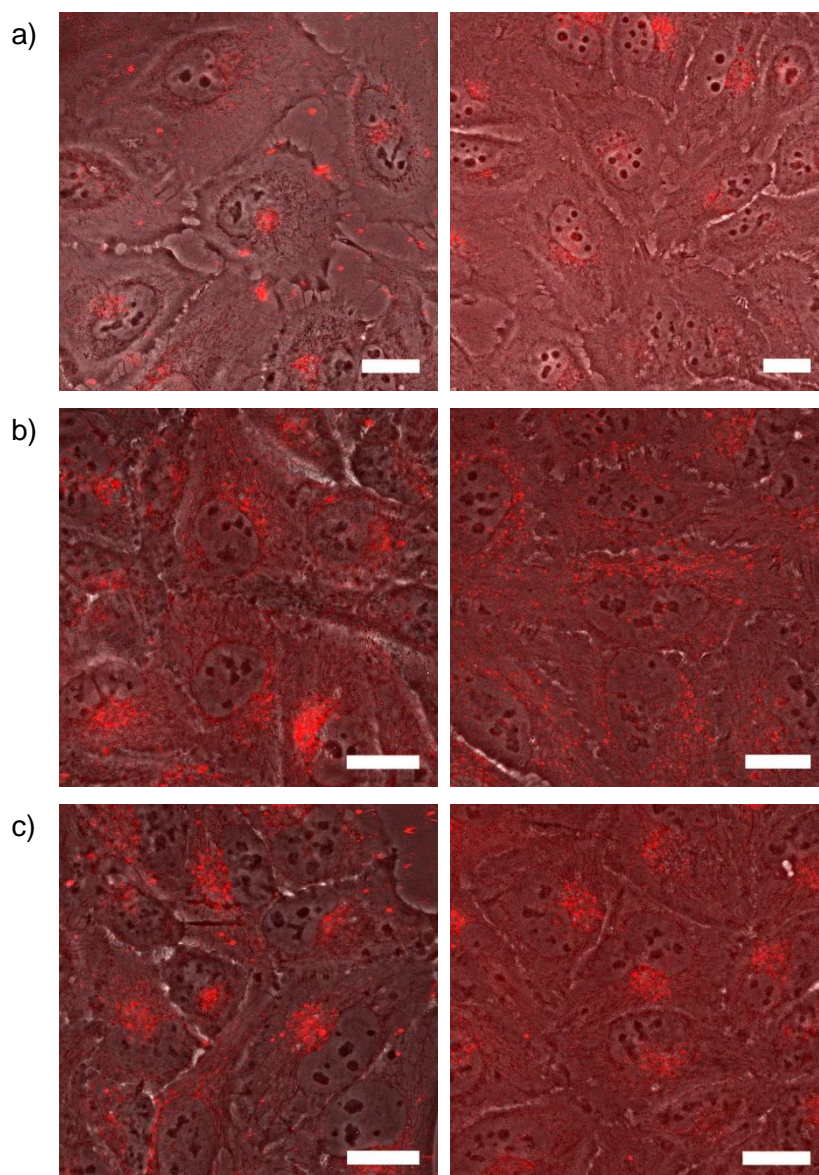

**Figure S6.** Confocal microscope image of HeLa cells after 1 h of incubation at 37 °C with a) **1** (5  $\mu\text{M}$ ), b) **2** (5  $\mu\text{M}$ ) and c) **3** (5  $\mu\text{M}$ ). Merged bright field image with fluorescence image ( $\lambda_{\text{ex}} = 405 \text{ nm}$ ;  $\lambda_{\text{em}} = 570\text{-}670 \text{ nm}$ ) before washing (left) shows the formation of nanoparticles, while after washing (right) a nominal uptake of the dye by the cell can be observed. Scale bars: 20  $\mu\text{m}$ .

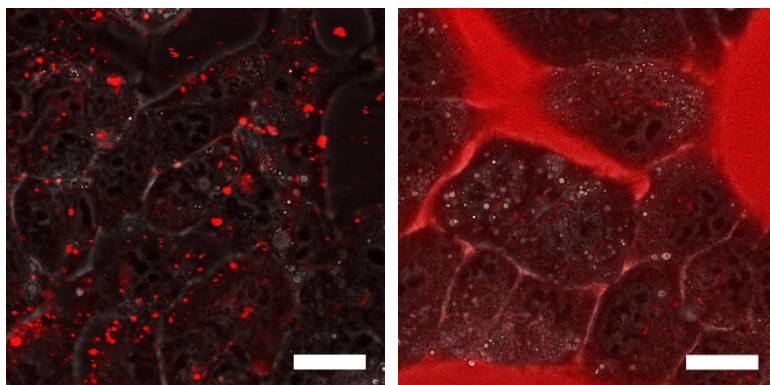

**Figure S7.** HepG2 cells challenged with fatty acids for 24 h and stained with **1** (5  $\mu\text{M}$ ) 24 h at 37 °C. Merged bright field image with fluorescence image ( $\lambda_{\text{ex}} = 405 \text{ nm}$ ;  $\lambda_{\text{em}} = 570\text{-}670 \text{ nm}$ ) without Pluronic F-127 (left) shows the formation of nanoparticles, while with the addition of 0.04% Pluronic F-127 (right) it shows the solution of the dye, but also no cellular uptake. Scale bars: 20  $\mu\text{m}$ .

**Table S13.** Measured particle sizes of the neutral compounds in PBS containing 0.5% DMSO with DLS.

| compound | particle size [nm] | error [ $\pm$ nm] |
|----------|--------------------|-------------------|
| <b>1</b> | 413.6              | 50.79             |
| <b>2</b> | 441.0              | 54.45             |
| <b>3</b> | 425.1              | 54.09             |

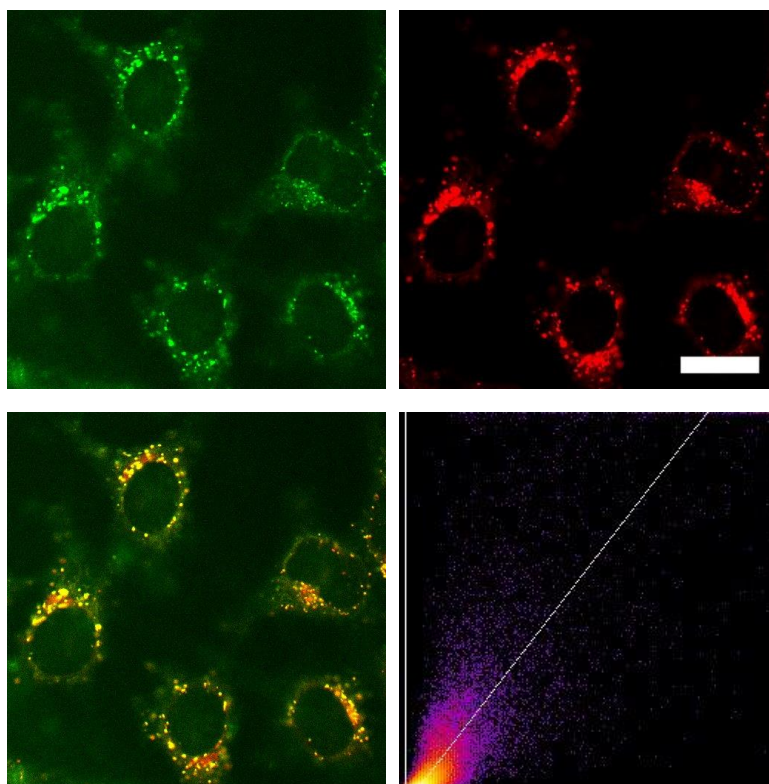

**Figure S8.** Co-staining experiment of HeLa cells with **1M** and LysoTracker™ Red. The cells were loaded with **1M** ( $0.5 \mu\text{M}$ , 2 h) and LysoTracker™ Red ( $0.1 \mu\text{M}$ , 20 min) at  $37 \text{ }^\circ\text{C}$ . Fluorescence images of **1M** (top, left,  $\lambda_{\text{ex}} = 405 \text{ nm}$ ;  $\lambda_{\text{em}} = 450 - 550 \text{ nm}$ ) and LysoTracker™ Red (top, right,  $\lambda_{\text{ex}} = 561 \text{ nm}$ ;  $\lambda_{\text{em}} = 600 - 750 \text{ nm}$ ). The merged fluorescence images (bottom, left) and the correlation plot of the intensities (bottom, right,  $R_r = 0.80$ ) show co-localization of the dye **1M** with lysosome. Scale bar:  $20 \mu\text{m}$ .



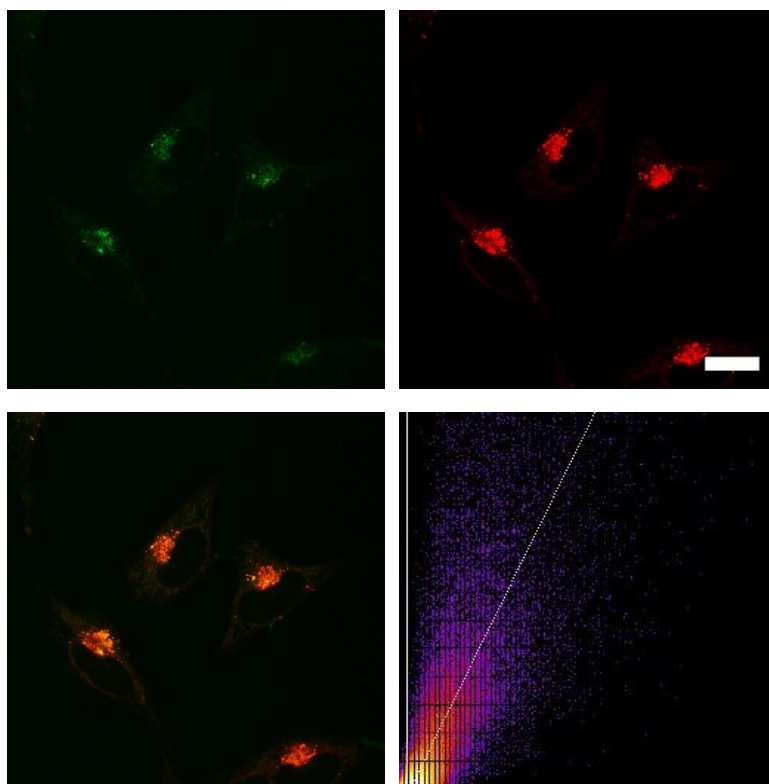

**Figure S9.** Co-staining experiment of HeLa cells with **2M** and LysoTracker™ Red. The cells were loaded with **2M** ( $0.5 \mu\text{M}$ , 2 h) and LysoTracker™ Red ( $0.1 \mu\text{M}$ , 20 min) at  $37 \text{ }^\circ\text{C}$ . Fluorescence images of **2M** (top, left,  $\lambda_{\text{ex}} = 405 \text{ nm}$ ;  $\lambda_{\text{em}} = 450 - 550 \text{ nm}$ ) and LysoTracker™ Red (top, right,  $\lambda_{\text{ex}} = 561 \text{ nm}$ ;  $\lambda_{\text{em}} = 600 - 750 \text{ nm}$ ). The merged fluorescence images (bottom, left) and the correlation plot of the intensities (bottom, right,  $R_r = 0.73$ ) show co-localization of the dye **2M** with lysosome. Scale bar:  $20 \mu\text{m}$ .

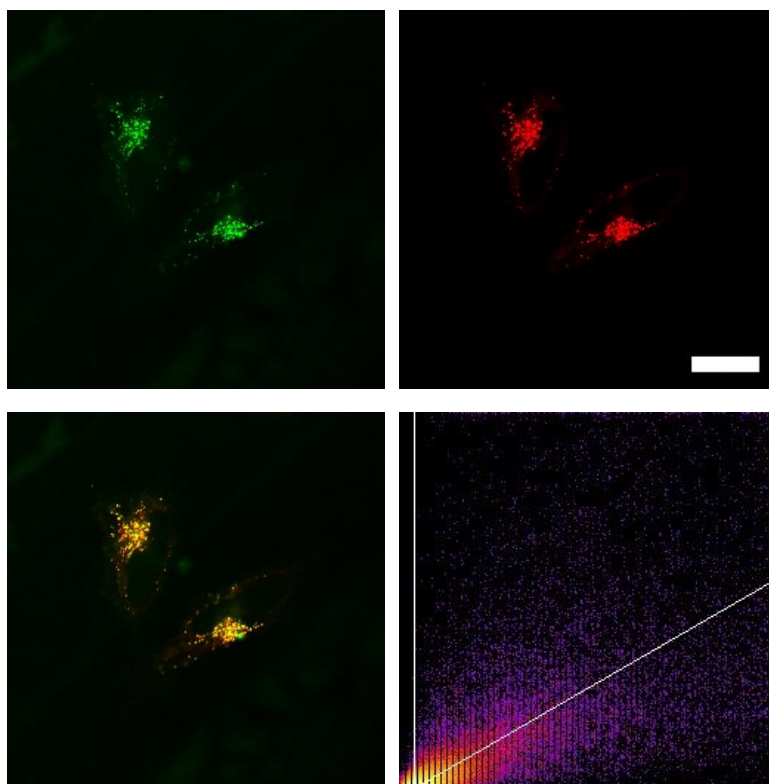

**Figure S10.** Co-staining experiment of HeLa cells with **3M** and LysoTracker™ Red. The cells were loaded with **3M** (0.5  $\mu\text{M}$ , 2 h) and LysoTracker™ Red (0.1  $\mu\text{M}$ , 20 min) at 37 °C. Fluorescence images of **3M** (top, left,  $\lambda_{\text{ex}} = 405 \text{ nm}$ ;  $\lambda_{\text{em}} = 450 - 550 \text{ nm}$ ) and LysoTracker Red (top, right,  $\lambda_{\text{ex}} = 561 \text{ nm}$ ;  $\lambda_{\text{em}} = 600 - 750 \text{ nm}$ ). The merged fluorescence images (bottom, left) and the correlation plot of the intensities (bottom, right,  $R_r = 0.75$ ) show co-localization of the dye **3M** with lysosome. Scale bar: 20  $\mu\text{m}$ .

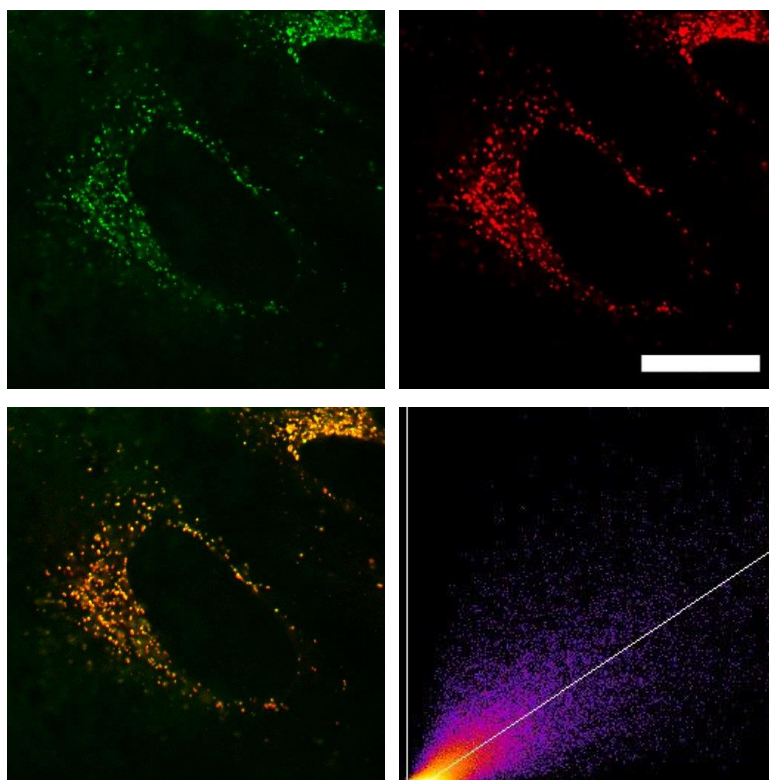

**Figure S11.** Co-staining experiment of HeLa cells with **4M** and LysoTracker™ Red. The cells were loaded with **4M** (0.5  $\mu\text{M}$ , 2 h) and LysoTracker™ Red (0.1  $\mu\text{M}$ , 20 min) at 37 °C. Fluorescence images of **4M** (top, left,  $\lambda_{\text{ex}} = 405 \text{ nm}$ ;  $\lambda_{\text{em}} = 500 - 605 \text{ nm}$ ) and LysoTracker™ Red (top, right,  $\lambda_{\text{ex}} = 561 \text{ nm}$ ;  $\lambda_{\text{em}} = 607 - 786 \text{ nm}$ ). The merged fluorescence images (bottom, left) and the correlation plot of the intensities (bottom, right,  $R_r = 0.83$ ) show co-localization of the dye **4M** with lysosome. Scale bar: 20  $\mu\text{m}$ .

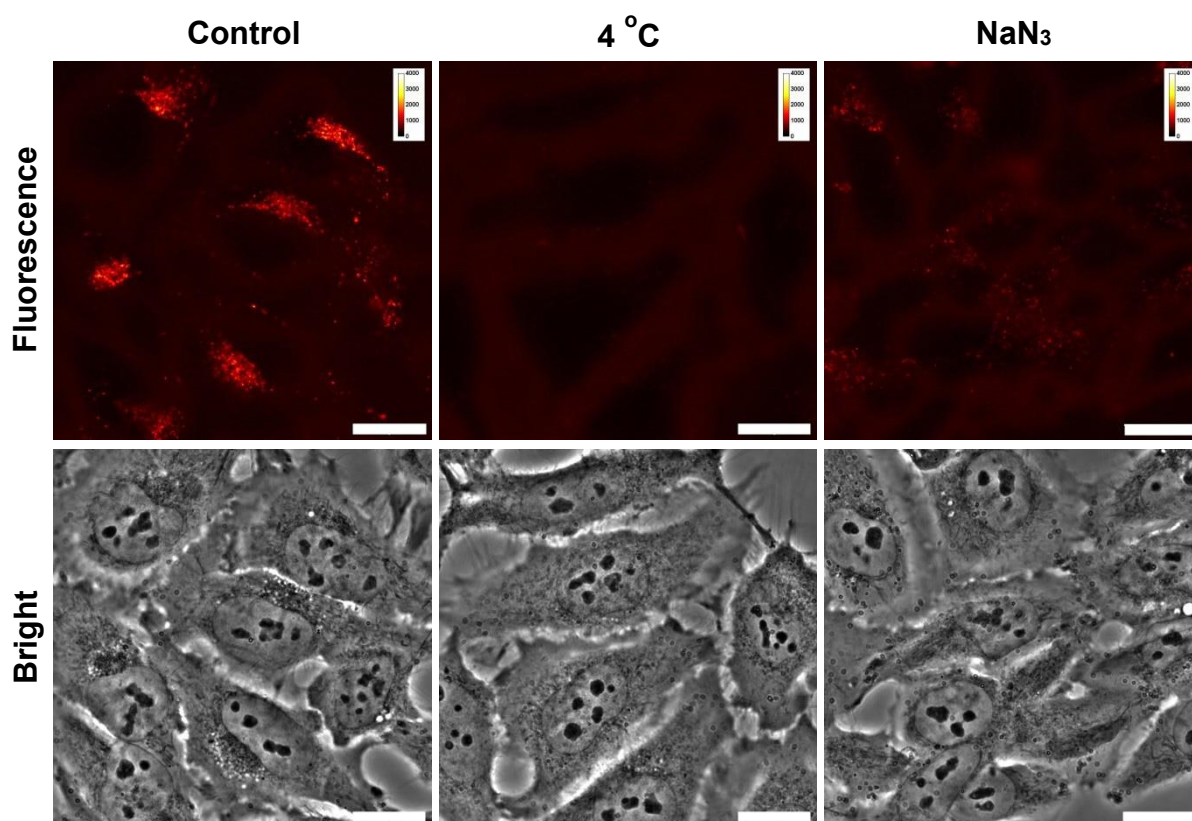

**Figure S12.** Cell staining with 500 nM of **5M** in DMEM for 2 h at 37 °C (left), for 2 h at 4°C (middle) and for 2 h at 37 °C with 0.1% NaN<sub>3</sub> (right). Fluorescence images of **5M** (top,  $\lambda_{ex}$  = 559 nm;  $\lambda_{em}$  = 570 – 670 nm) and bright field images (bottom) suggest an endocytosis pathway. Scale bars: 20  $\mu$ m.

## Cell Viability

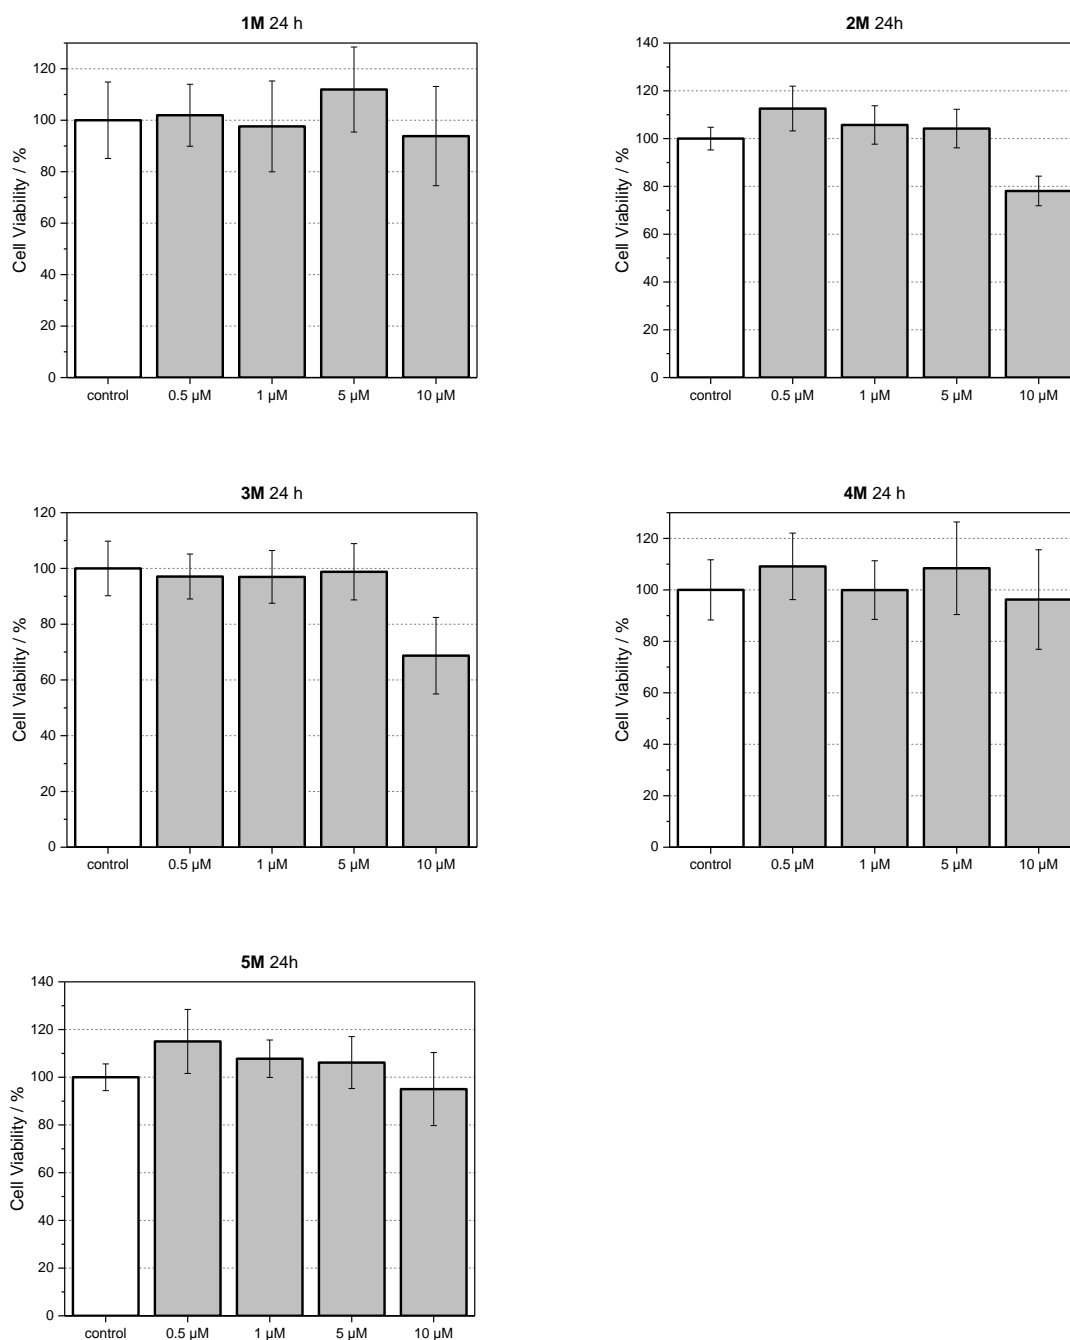

**Figure S13.** Cell viability of **1M-5M** loaded HeLa cells determined by MTT assay. The cells were incubated with **1M-5M** (0, 0.5, 1, 5, 10  $\mu\text{M}$ ) in DMEM containing 0.5% DMSO in a  $\text{CO}_2$  incubator for 24 h. The results are expressed as percentages of the dye-free controls. All data are presented as mean standard deviation ( $n = 10$ ).

## NMR Spectra

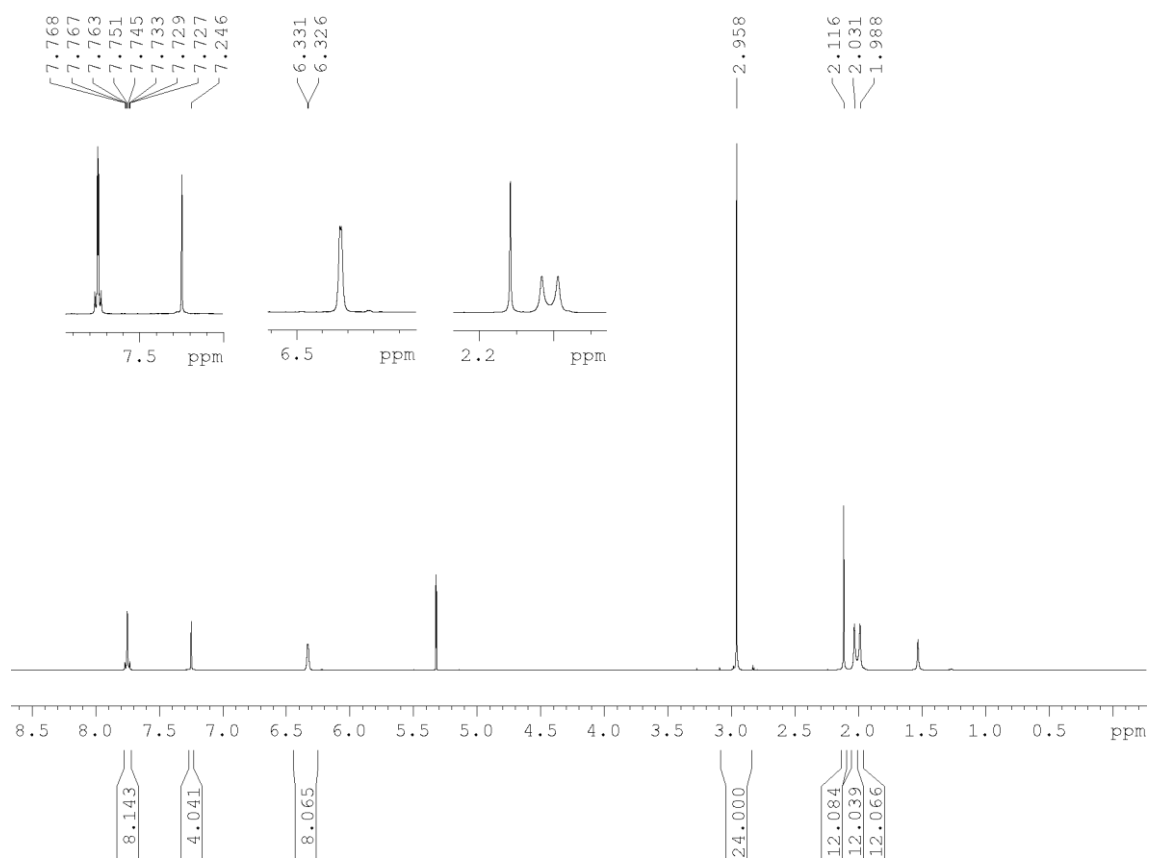

**Figure S14.** <sup>1</sup>H NMR spectrum of **1** in CD<sub>2</sub>Cl<sub>2</sub> at 500 MHz.

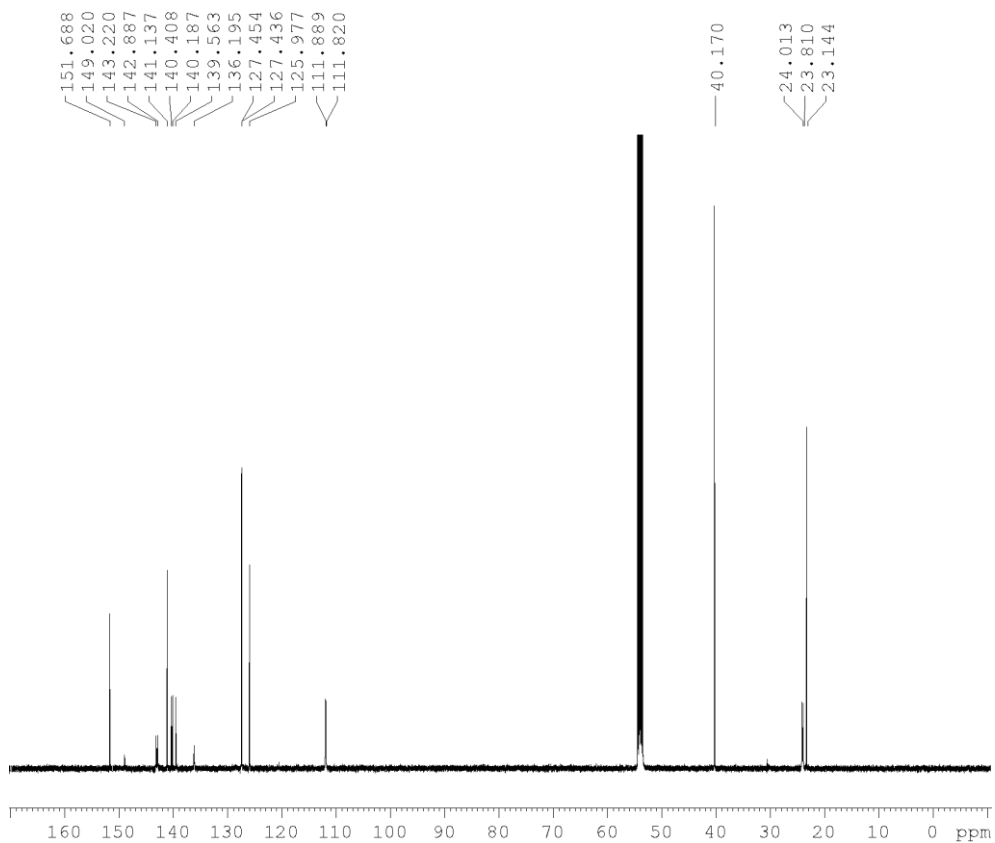

**Figure S15.** <sup>13</sup>C{<sup>1</sup>H} NMR spectrum of **1** in CD<sub>2</sub>Cl<sub>2</sub> at 125 MHz.

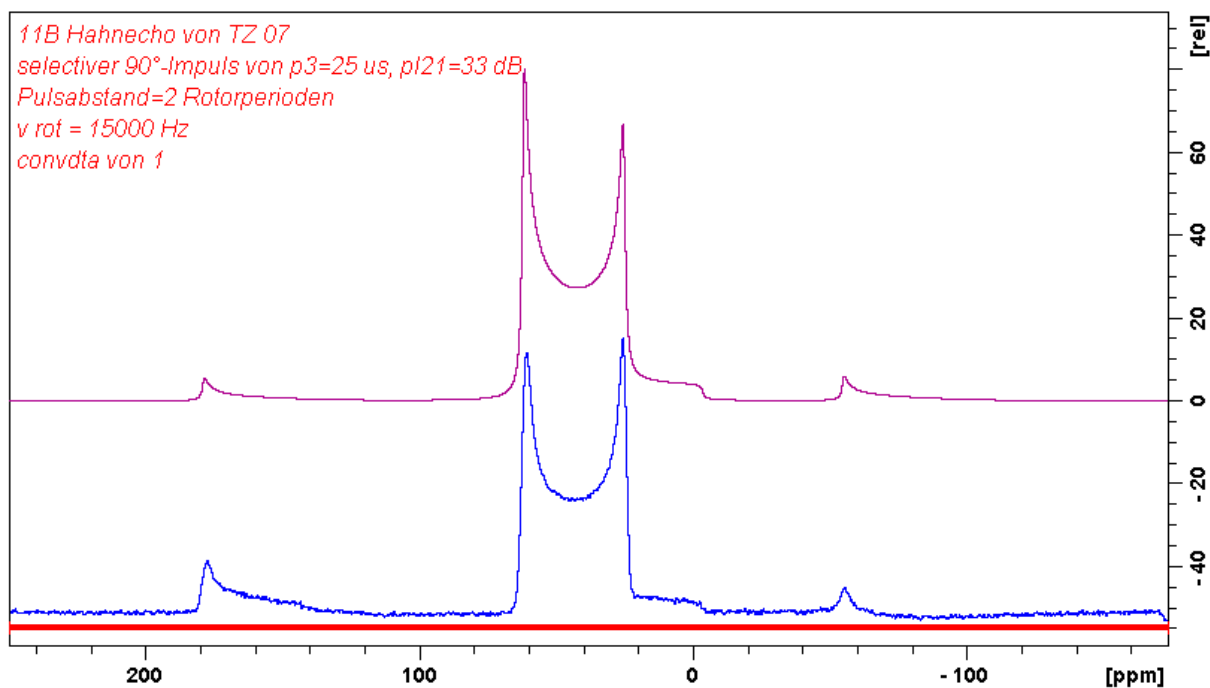

**Figure S16.** Solid-state  $^{11}\text{B}\{^1\text{H}\}$  NMR spectrum of **1** at 128 MHz. (Top: Simulation) isotropic chemical shift  $\delta_{\text{iso}} = 72.8$  ppm, quadrupolar coupling constant  $C_Q = 4.49$  MHz, quadrupolar asymmetry parameter  $\eta_{\text{Quad}} = 0.0$ .

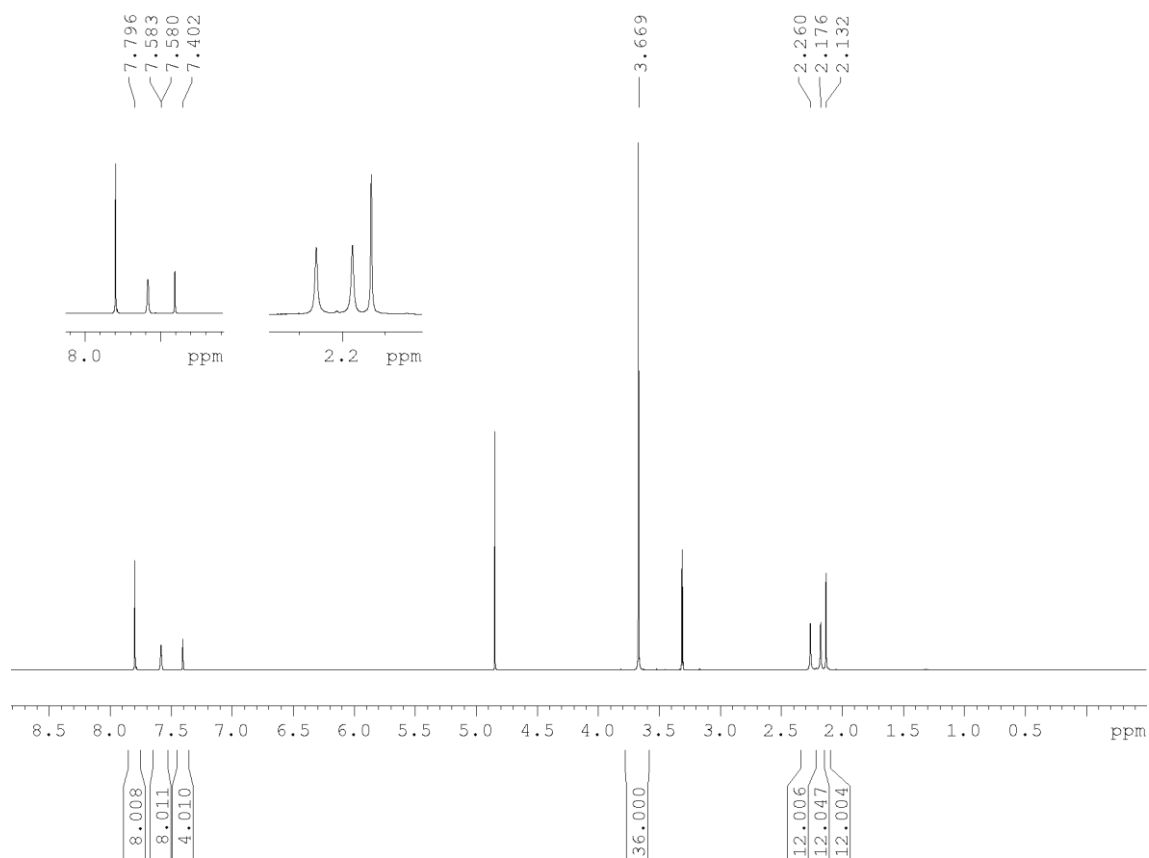

**Figure S17.**  $^1\text{H}$  NMR spectrum of **1M** in  $\text{CD}_3\text{OD}$  at 500 MHz.

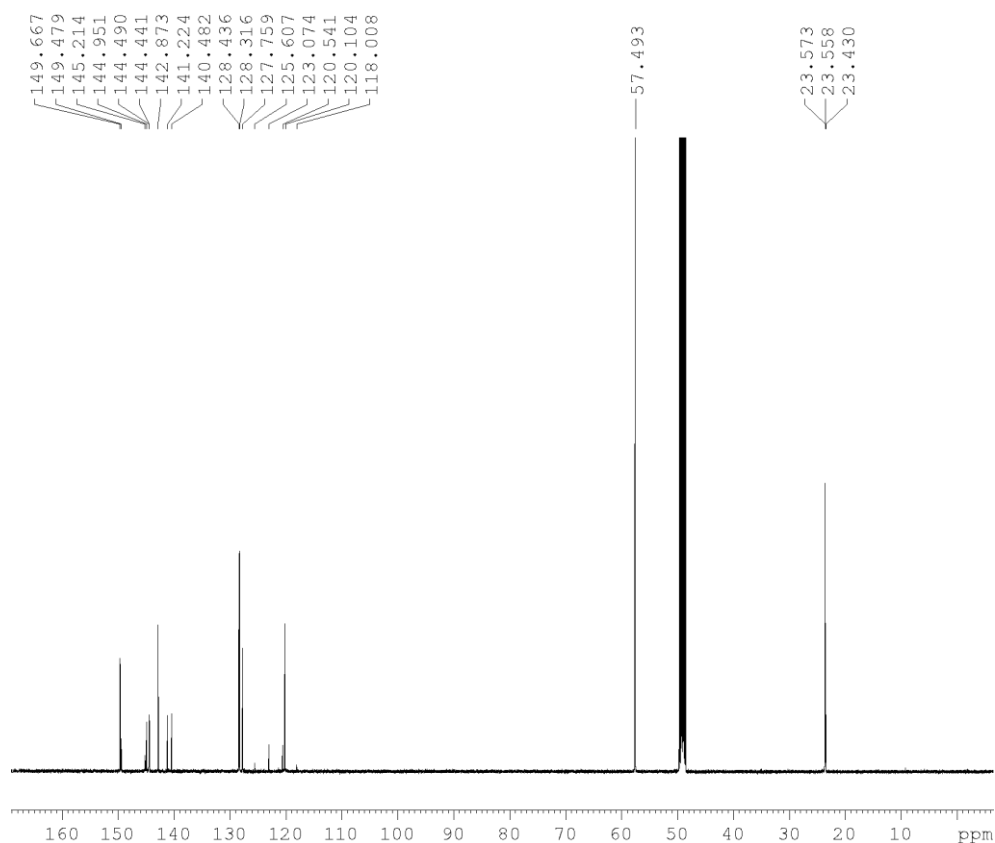

**Figure S18.**  $^{13}\text{C}\{^1\text{H}\}$  NMR spectrum of **1M** in  $\text{CD}_3\text{OD}$  at 125 MHz.

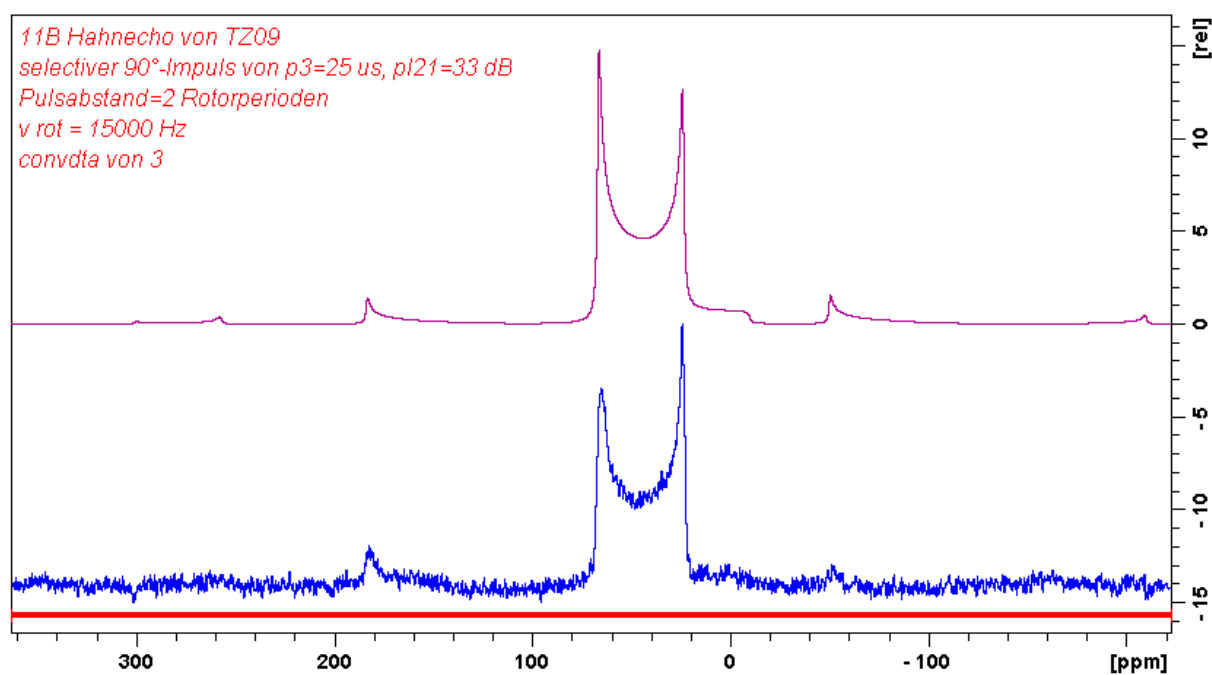

**Figure S19.** Solid-state  $^{11}\text{B}\{^1\text{H}\}$  NMR spectrum of **1M** at 128 MHz. (Top: Simulation) isotropic chemical shift  $\delta_{\text{iso}} = 79.2$  ppm, quadrupolar coupling constant  $C_Q = 4.86$  MHz, quadrupolar asymmetry parameter  $\eta_{\text{Quad}} = 0.0$ .



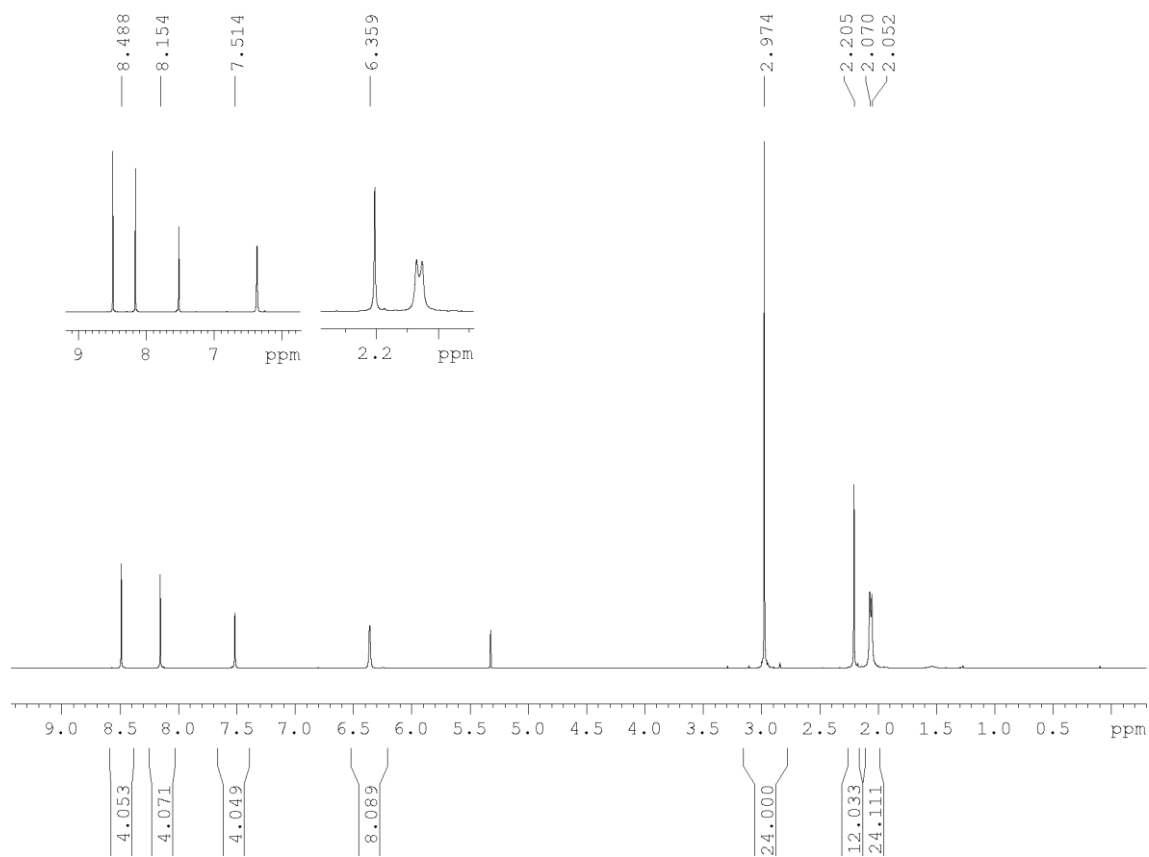

**Figure S20.**  $^1\text{H}$  NMR spectrum of **2** in  $\text{CD}_2\text{Cl}_2$  at 500 MHz.

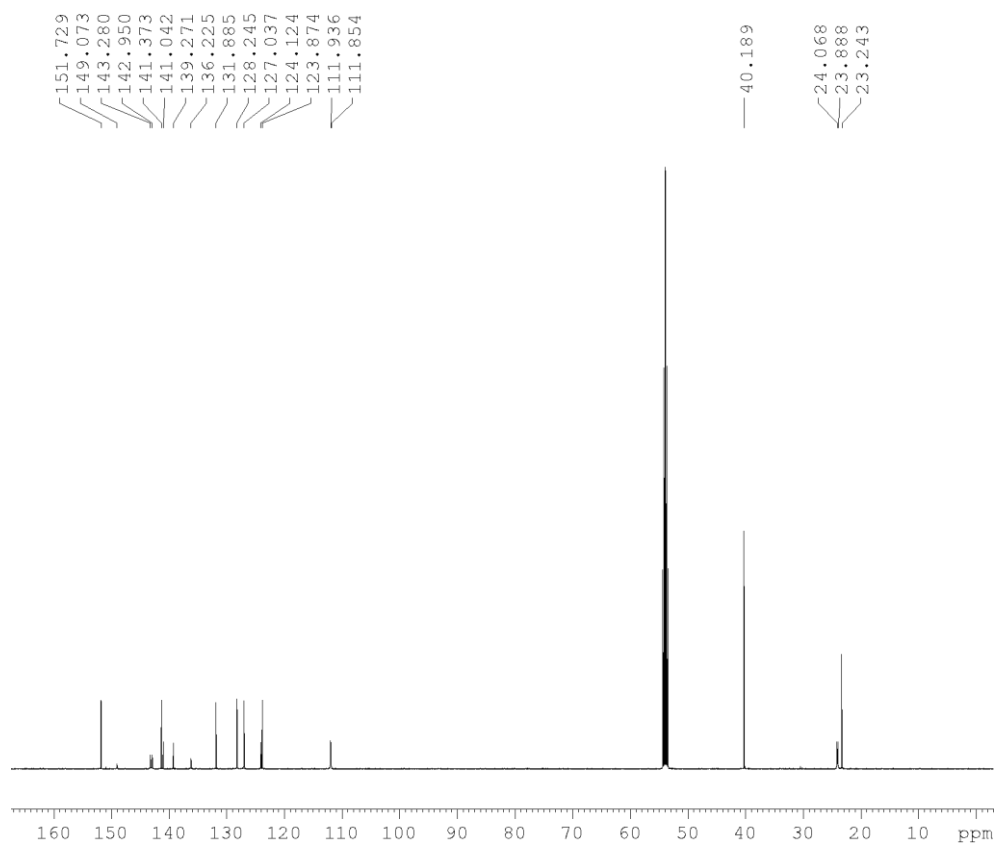

**Figure S21.**  $^{13}\text{C}\{^1\text{H}\}$  NMR spectrum of **2** in  $\text{CD}_2\text{Cl}_2$  at 125 MHz.

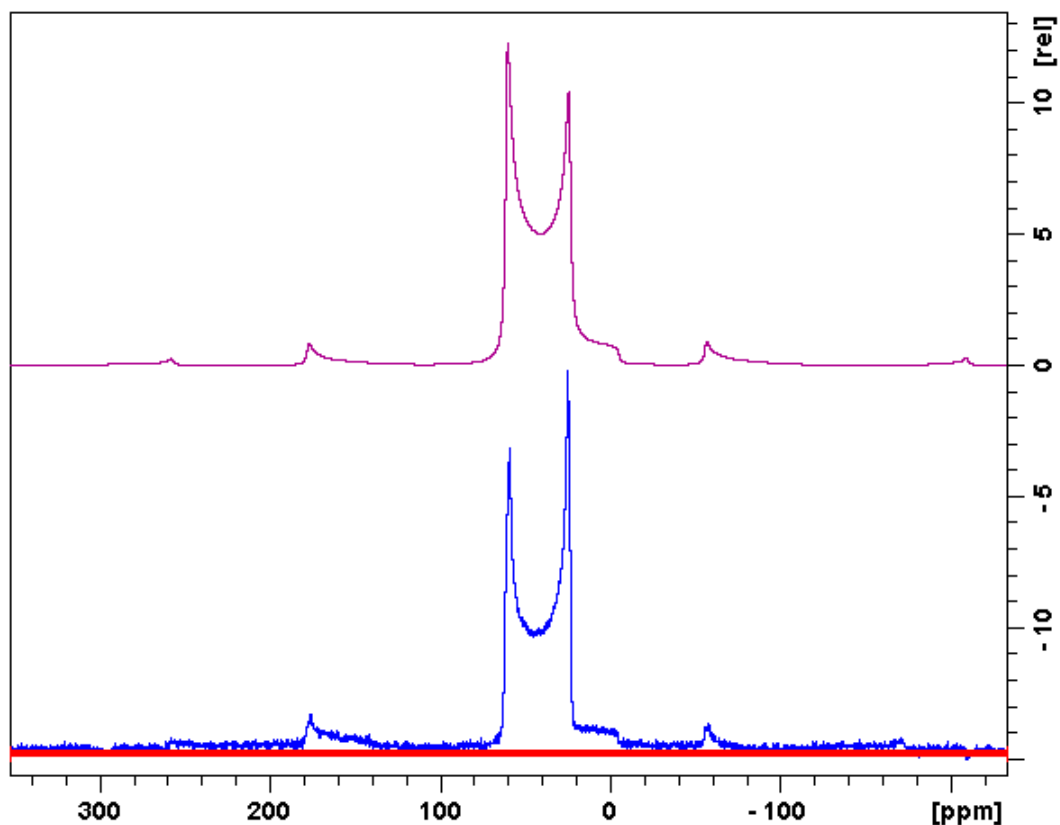

**Figure S22.** Solid-state  $^{11}\text{B}\{^1\text{H}\}$  NMR spectrum of **2** at 128 MHz. (Top: Simulation) isotropic chemical shift  $\delta_{\text{iso}} = 71.9$  ppm, quadrupolar coupling constant  $C_Q = 4.51$  MHz, quadrupolar asymmetry parameter  $\eta_{\text{Quad}} = 0.0$ .

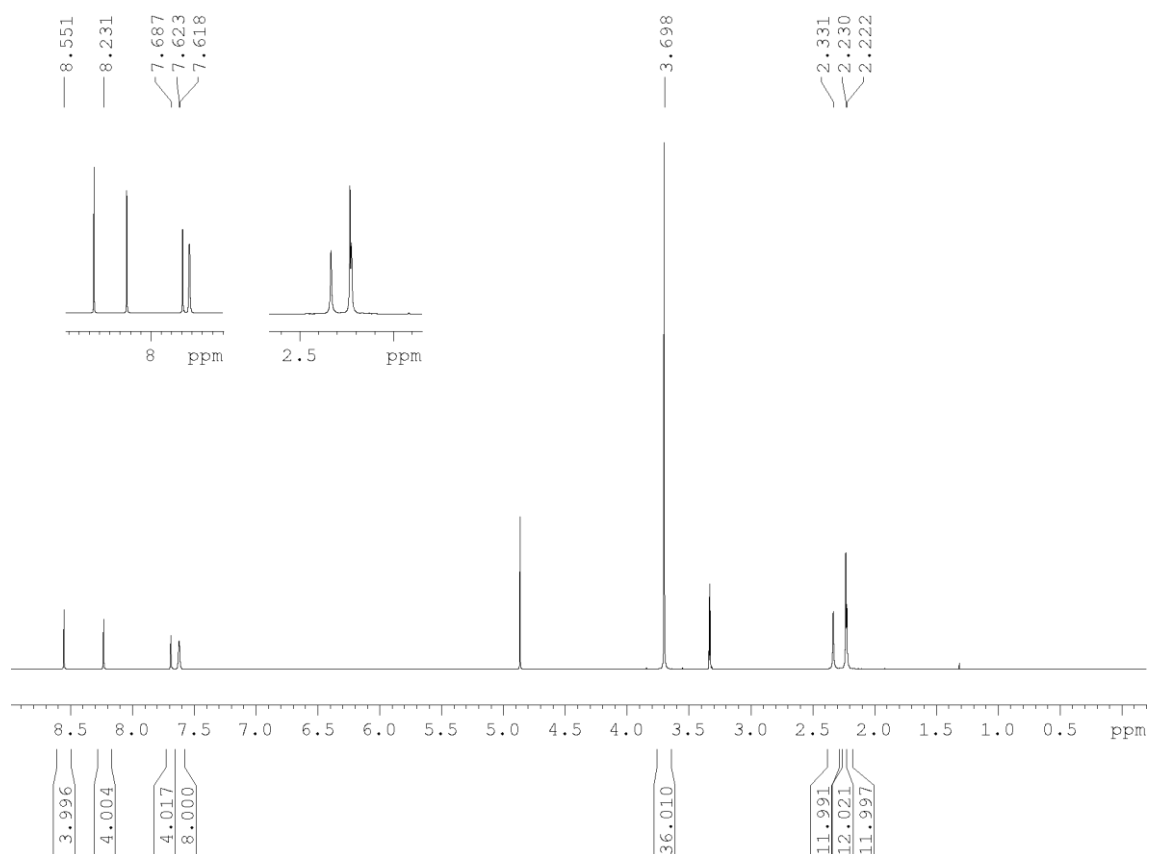

**Figure S23.**  $^1\text{H}$  NMR spectrum of **2M** in  $\text{CD}_3\text{OD}$  at 500 MHz.

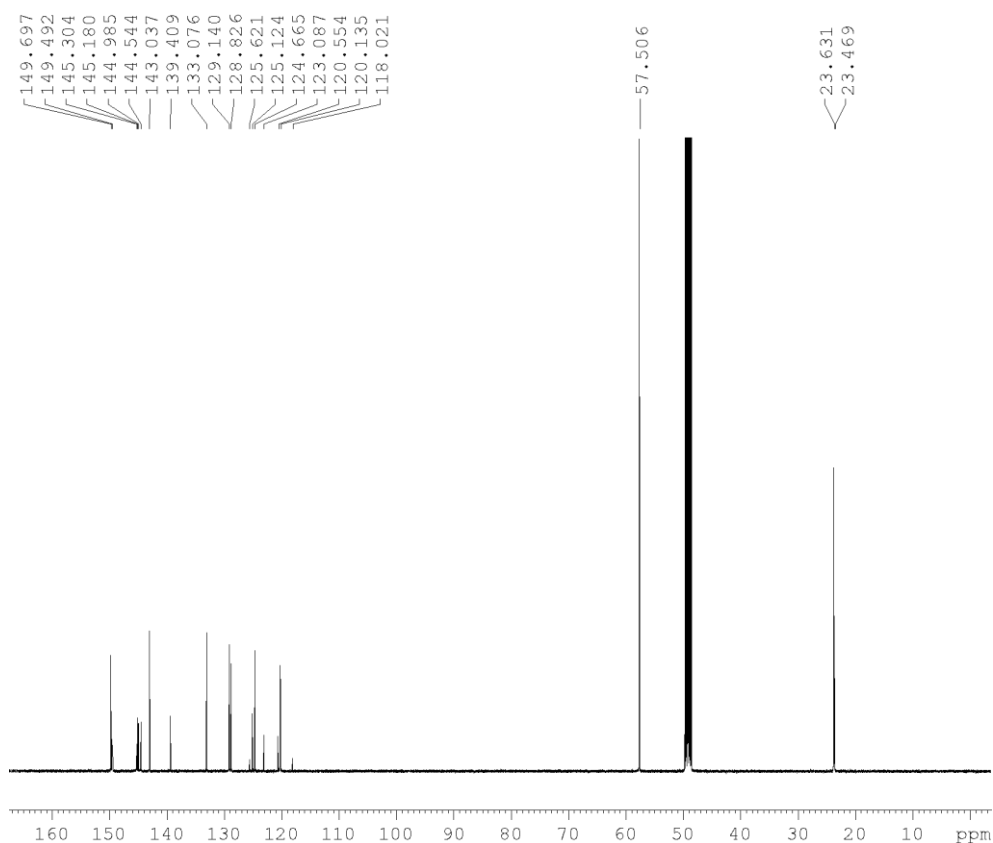

**Figure S24.**  $^{13}\text{C}\{^1\text{H}\}$  NMR spectrum of **2M** in  $\text{CD}_3\text{OD}$  at 125 MHz.

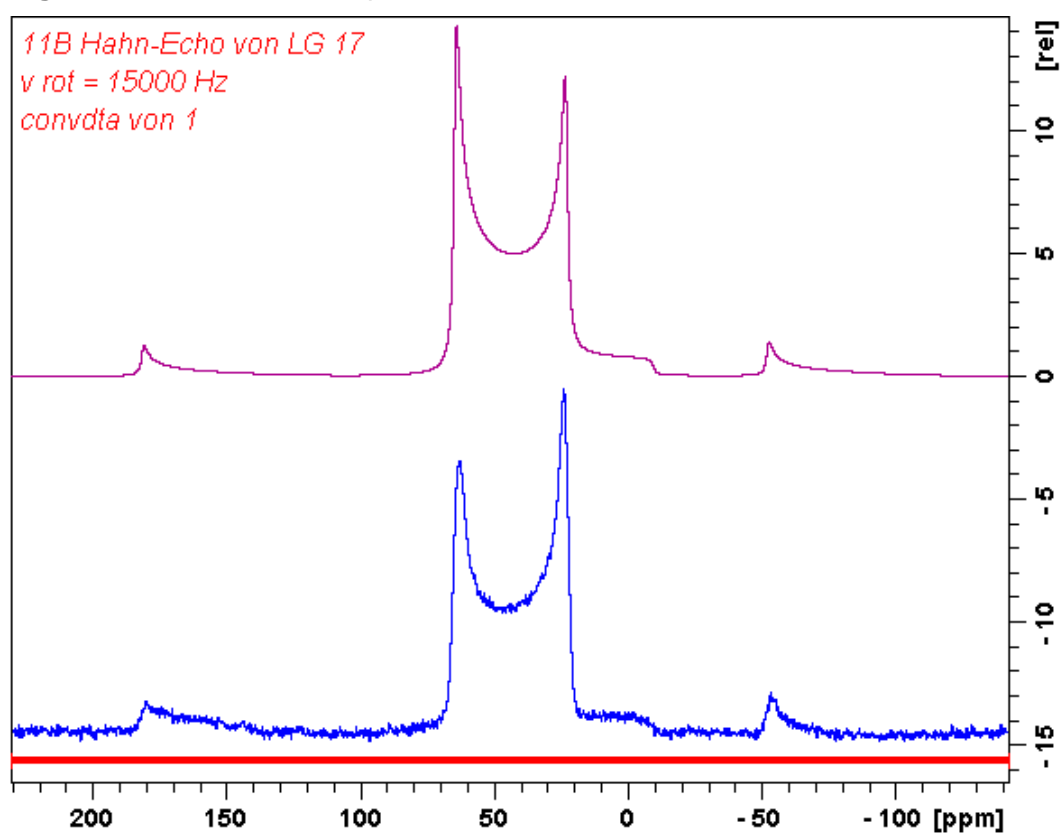

**Figure S25.** Solid-state  $^{11}\text{B}\{^1\text{H}\}$  NMR spectrum of **2M** at 128 MHz. (Top: Simulation) isotropic chemical shift  $\delta_{\text{iso}} = 77.2$  ppm, quadrupolar coupling constant  $C_Q = 4.78$  MHz, quadrupolar asymmetry parameter  $\eta_{\text{Quad}} = 0.0$ .

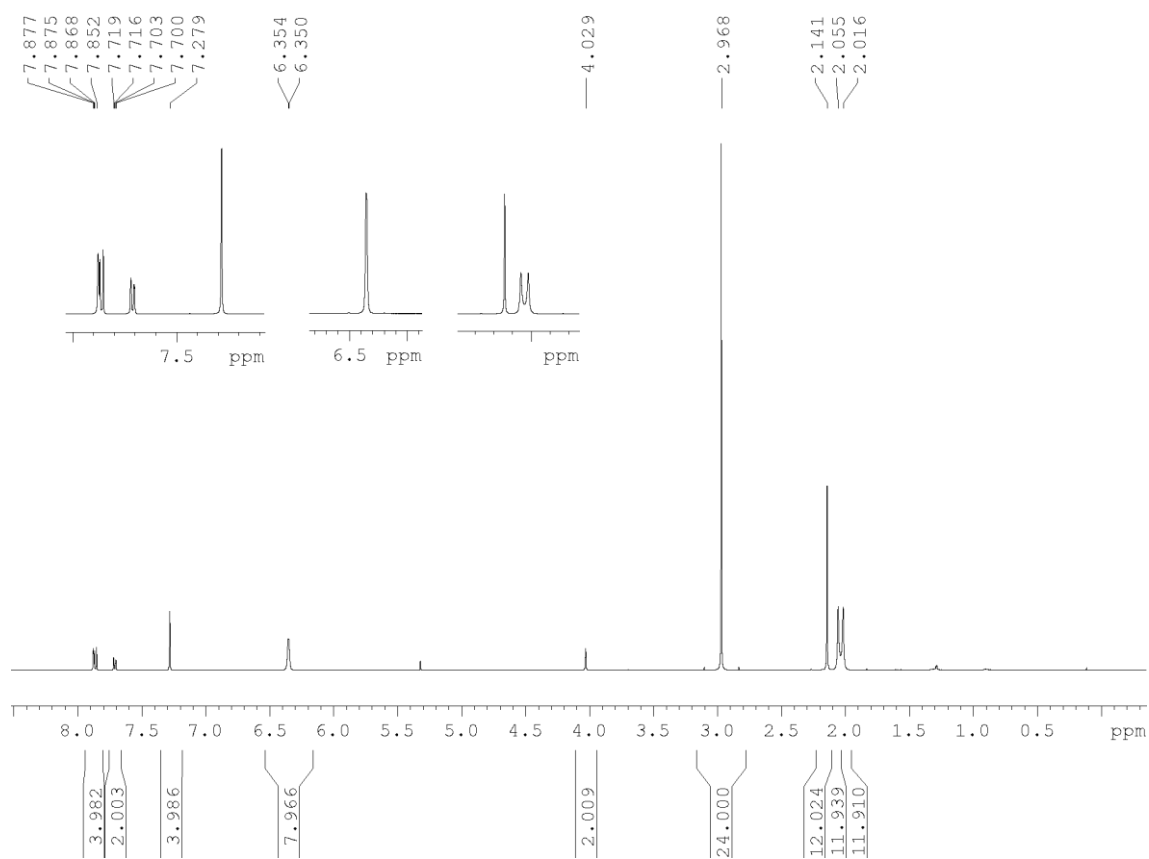

**Figure S26.**  $^1\text{H}$  NMR spectrum of **3** in  $\text{CD}_2\text{Cl}_2$  at 500 MHz.

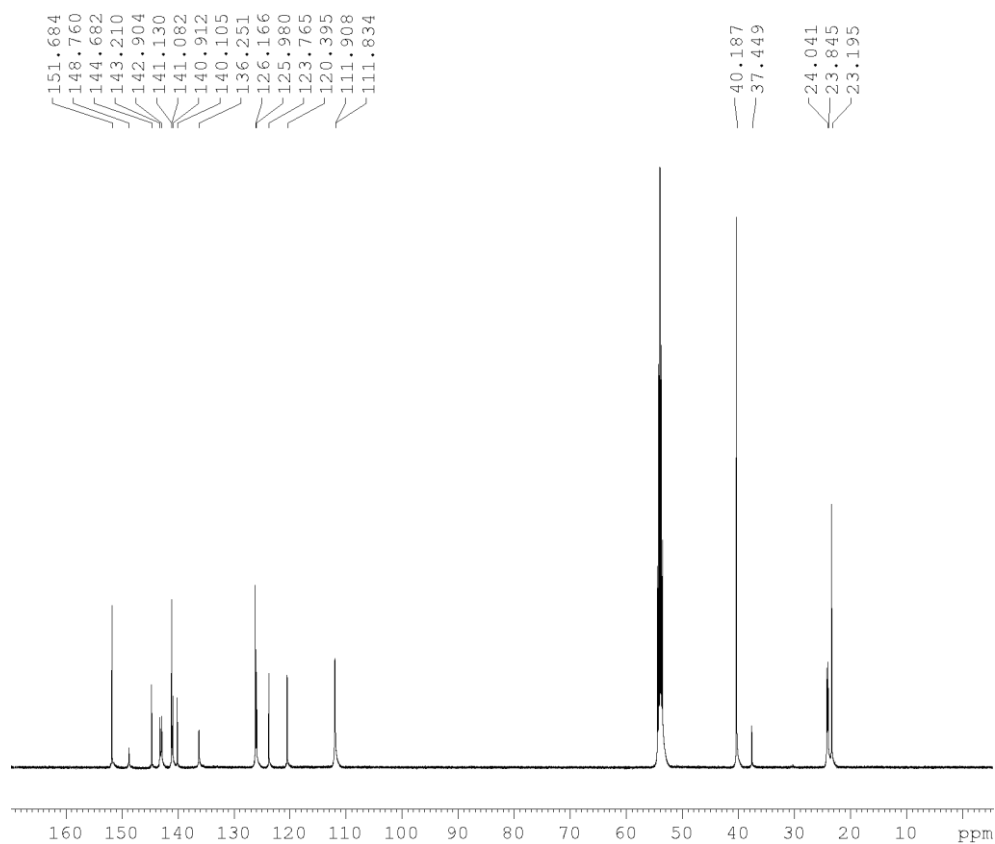

**Figure S27.**  $^{13}\text{C}\{^1\text{H}\}$  NMR spectrum of **3** in  $\text{CD}_2\text{Cl}_2$  at 125 MHz.

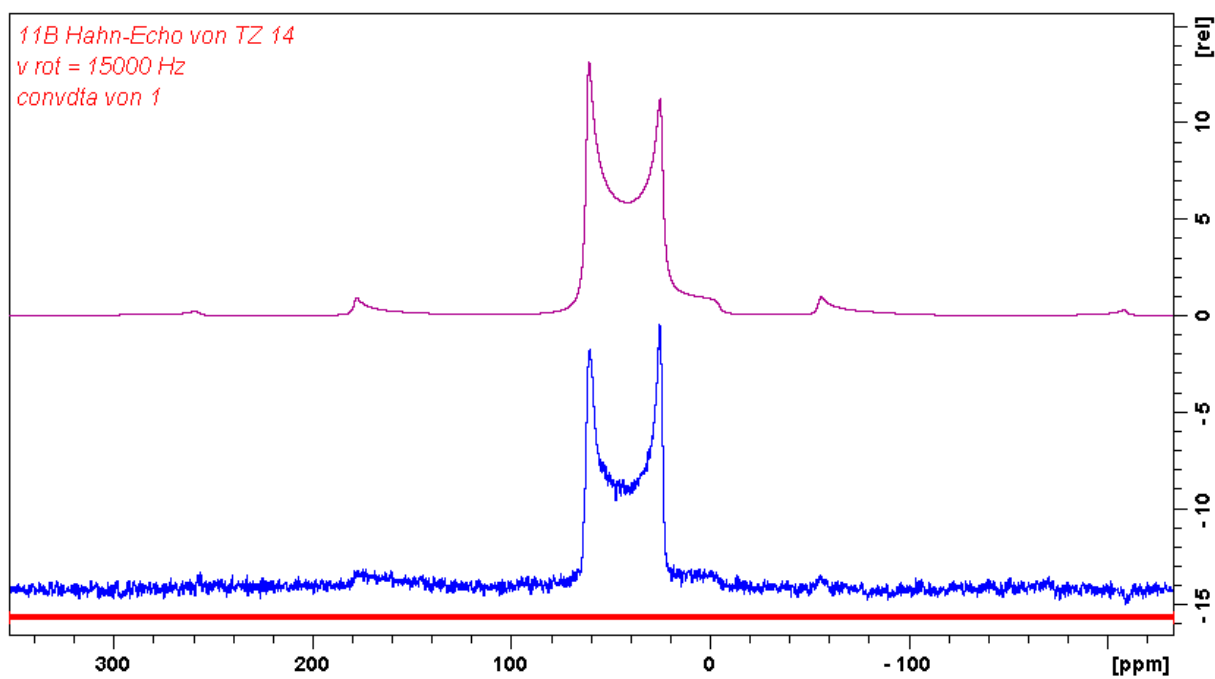

**Figure S28.** Solid-state  $^{11}\text{B}\{^1\text{H}\}$  NMR spectrum of **3** at 128 MHz. (Top: Simulation) isotropic chemical shift  $\delta_{\text{iso}} = 73.0$  ppm, quadrupolar coupling constant  $C_Q = 4.53$  MHz, quadrupolar asymmetry parameter  $\eta_{\text{Quad}} = 0.0$ .

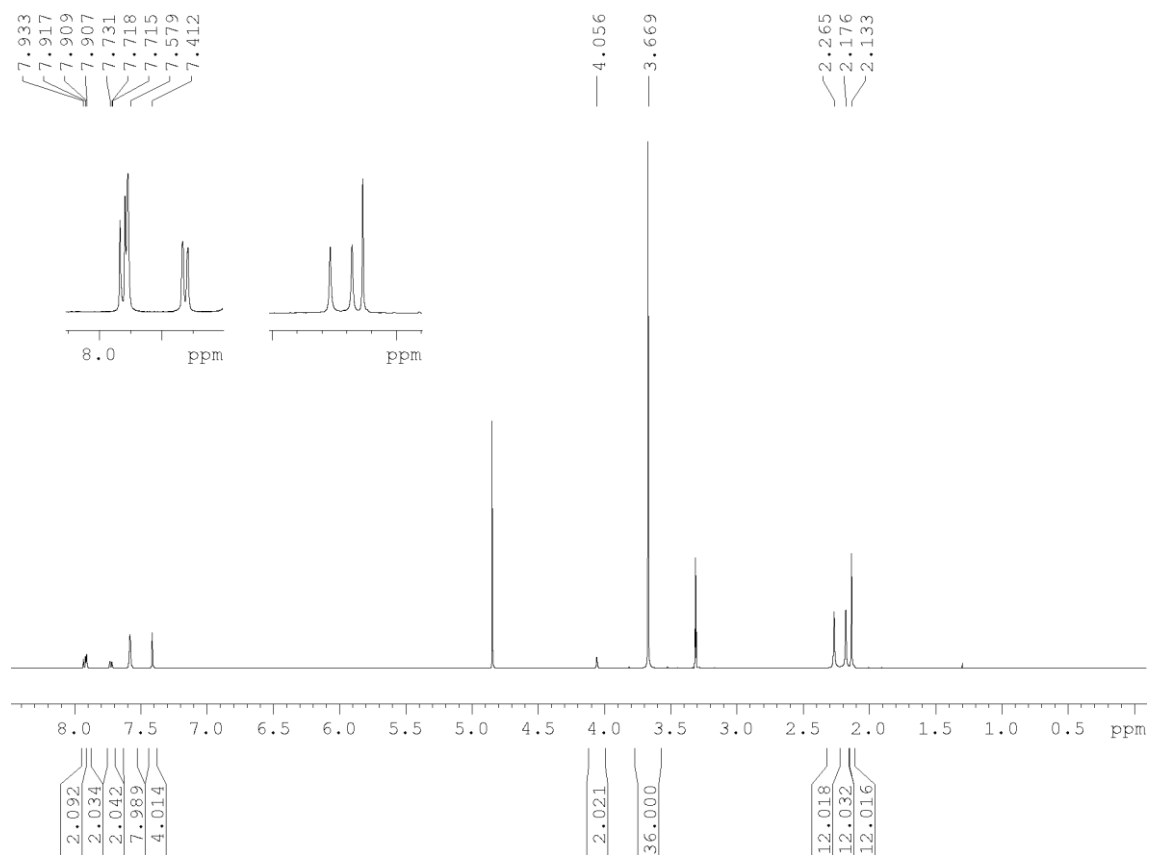

**Figure S29.**  $^1\text{H}$  NMR spectrum of **3M** in  $\text{CD}_3\text{OD}$  at 500 MHz.

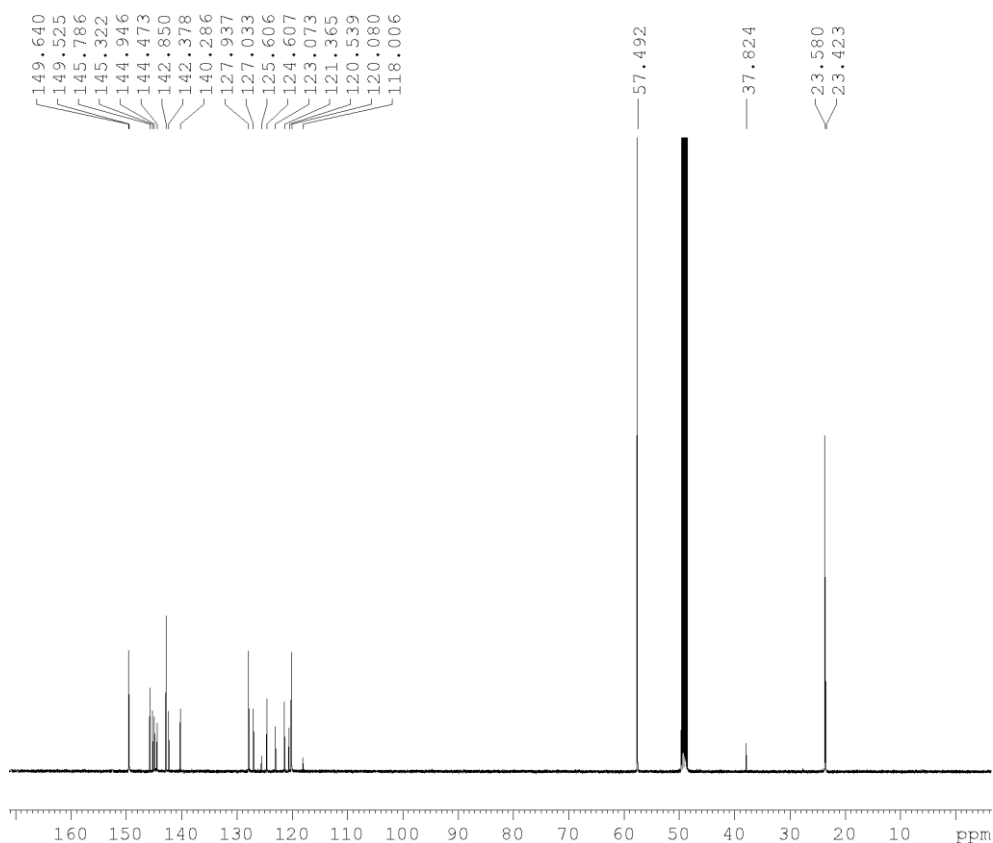

**Figure S30.**  $^{13}\text{C}\{^1\text{H}\}$  NMR spectrum of **3M** in  $\text{CD}_3\text{OD}$  at 125 MHz.

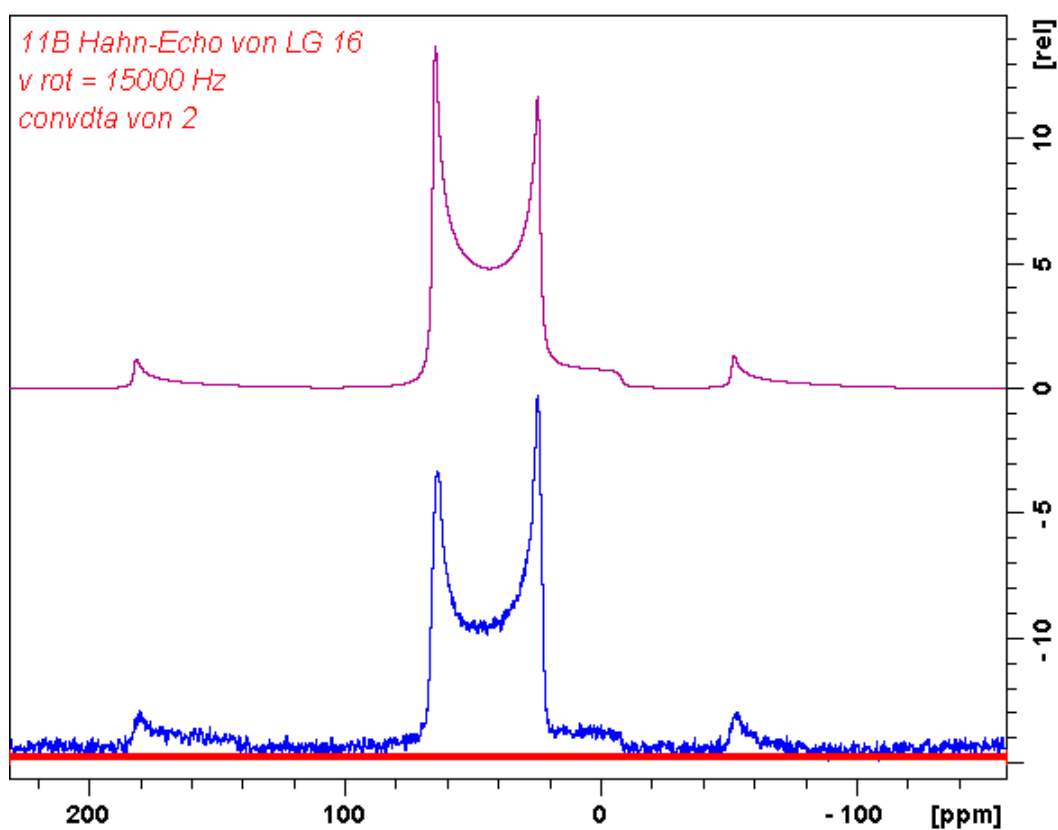

**Figure S31.** Solid-state  $^{11}\text{B}\{^1\text{H}\}$  NMR spectrum of **3M** at 128 MHz. (Top: Simulation) isotropic chemical shift  $\delta_{\text{iso}} = 77.1$  ppm, quadrupolar coupling constant  $C_Q = 4.76$  MHz, quadrupolar asymmetry parameter  $\eta_{\text{Quad}} = 0.0$ .

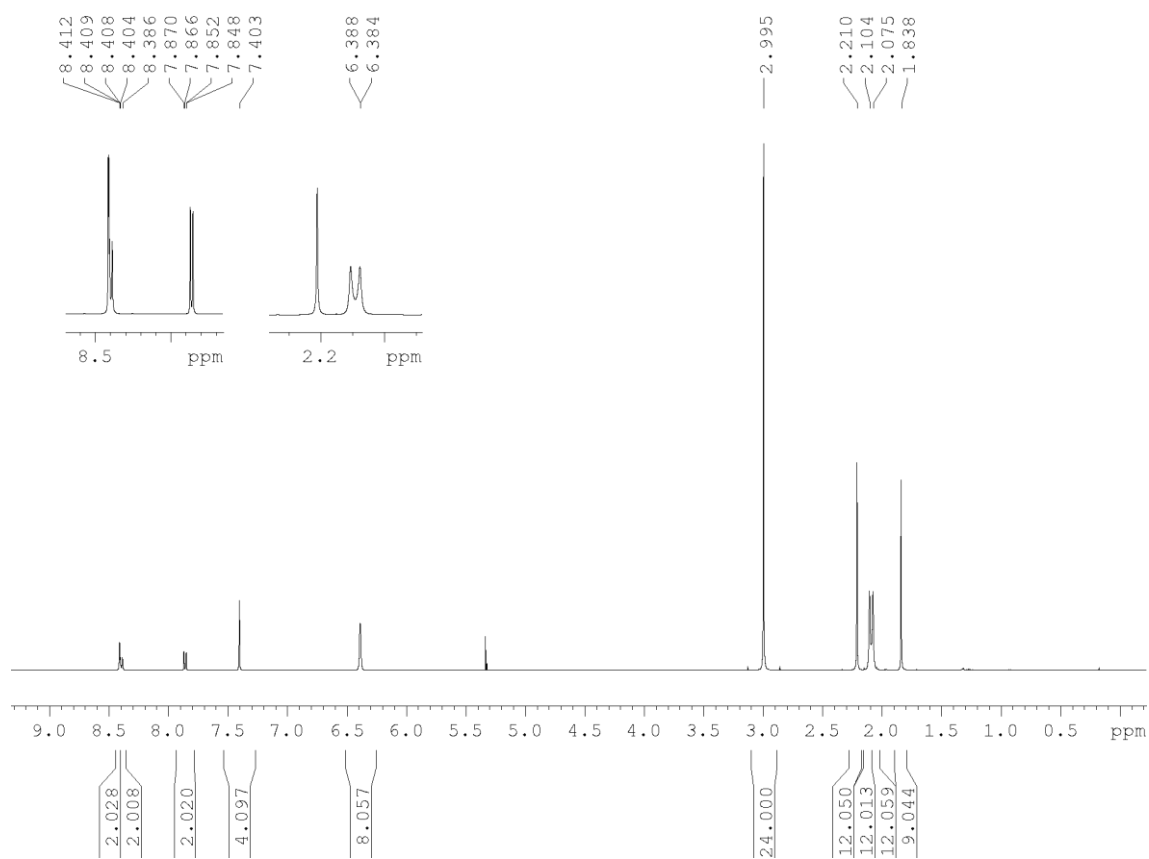

**Figure S32.**  $^1\text{H}$  NMR spectrum of **4** in  $\text{CD}_2\text{Cl}_2$  at 500 MHz.

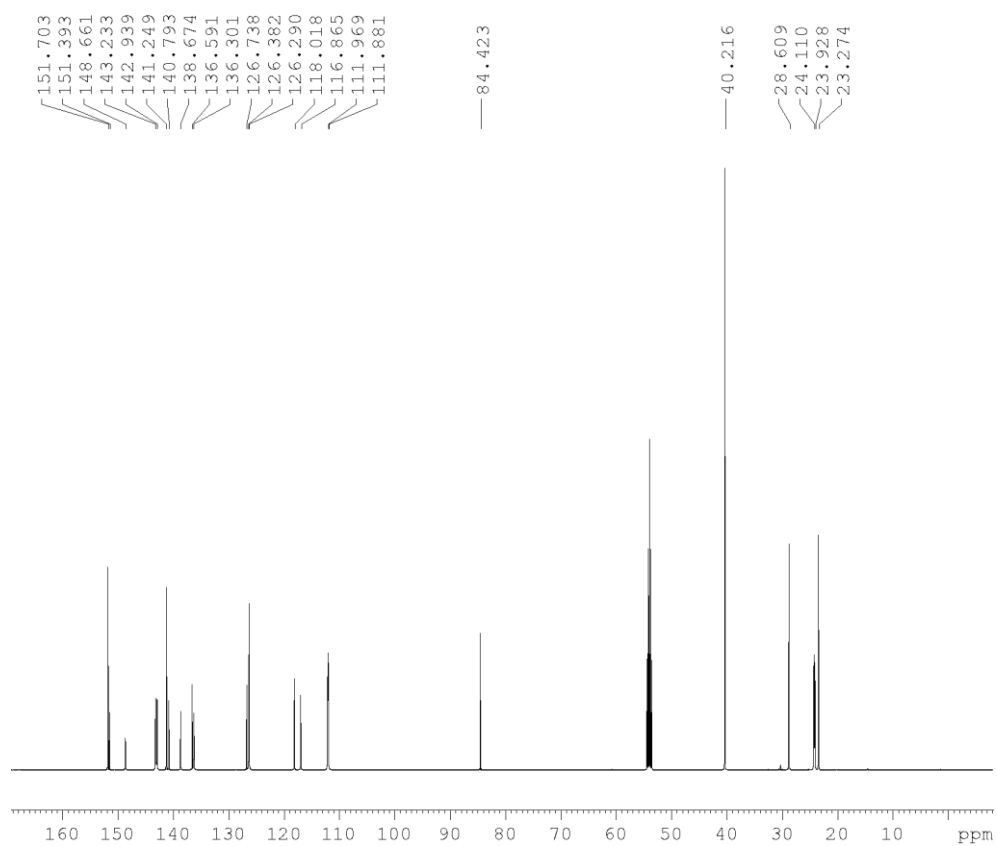

**Figure S33.**  $^{13}\text{C}\{^1\text{H}\}$  NMR spectrum of **4** in  $\text{CD}_2\text{Cl}_2$  at 125 MHz.

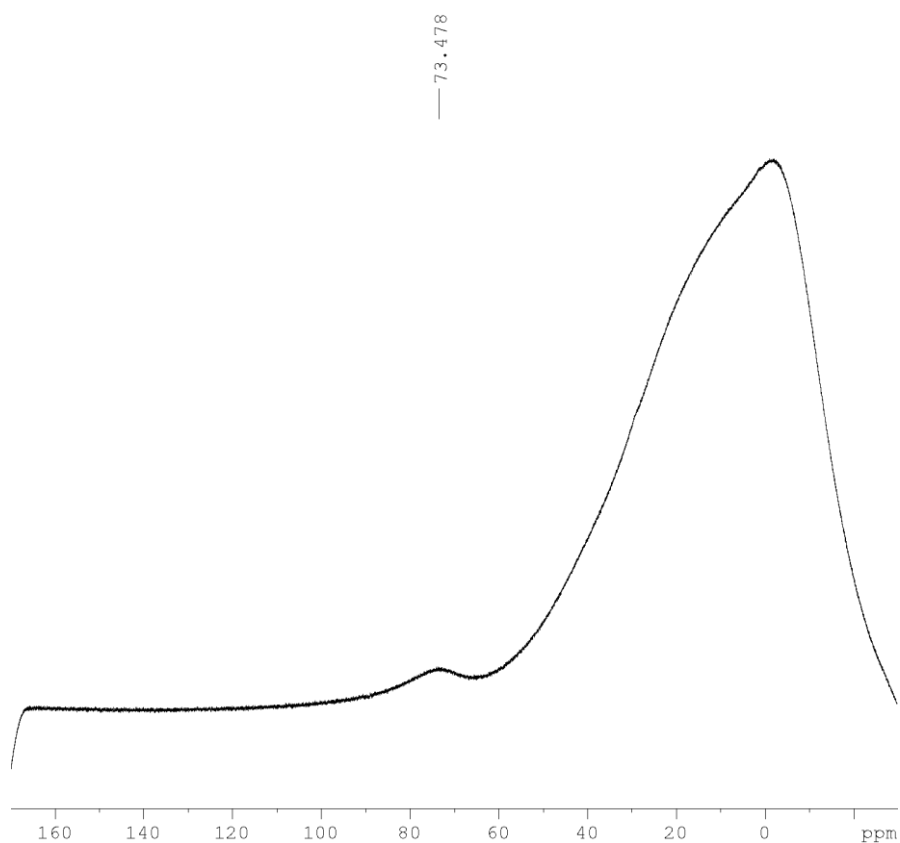

**Figure S34.**  $^{11}\text{B}\{^1\text{H}\}$  NMR spectrum of **4** in  $\text{CD}_2\text{Cl}_2$  at 160 MHz.

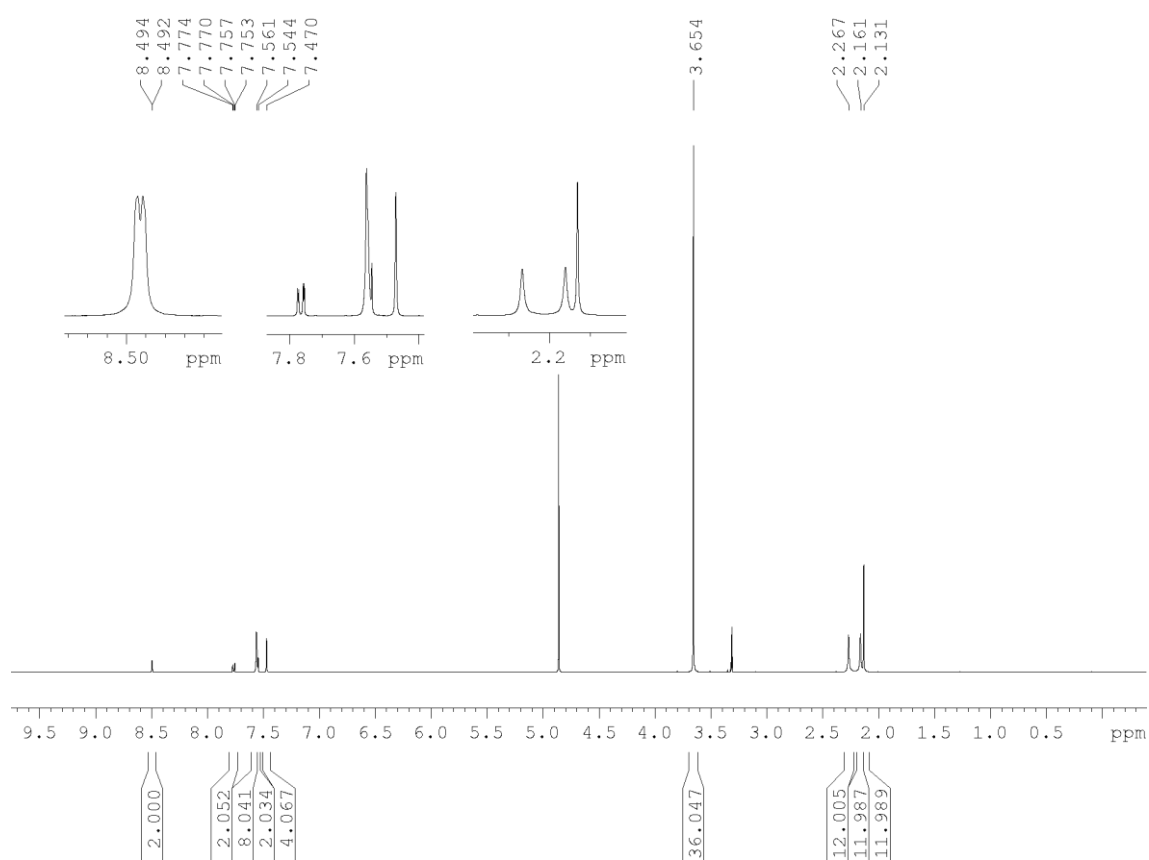

**Figure S35.**  $^1\text{H}$  NMR spectrum of **4M** in  $\text{CD}_3\text{OD}$  at 500 MHz.



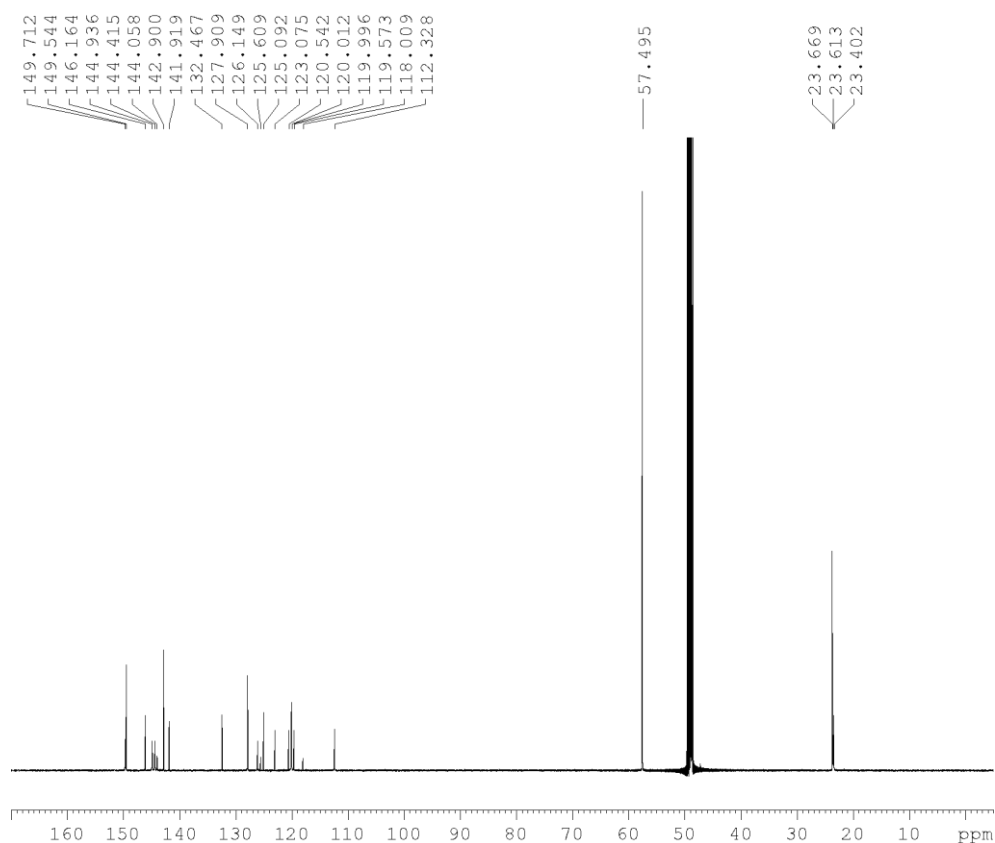

**Figure S36.**  $^{13}\text{C}\{^1\text{H}\}$  NMR spectrum of **4M** in  $\text{CD}_3\text{OD}$  at 125 MHz.

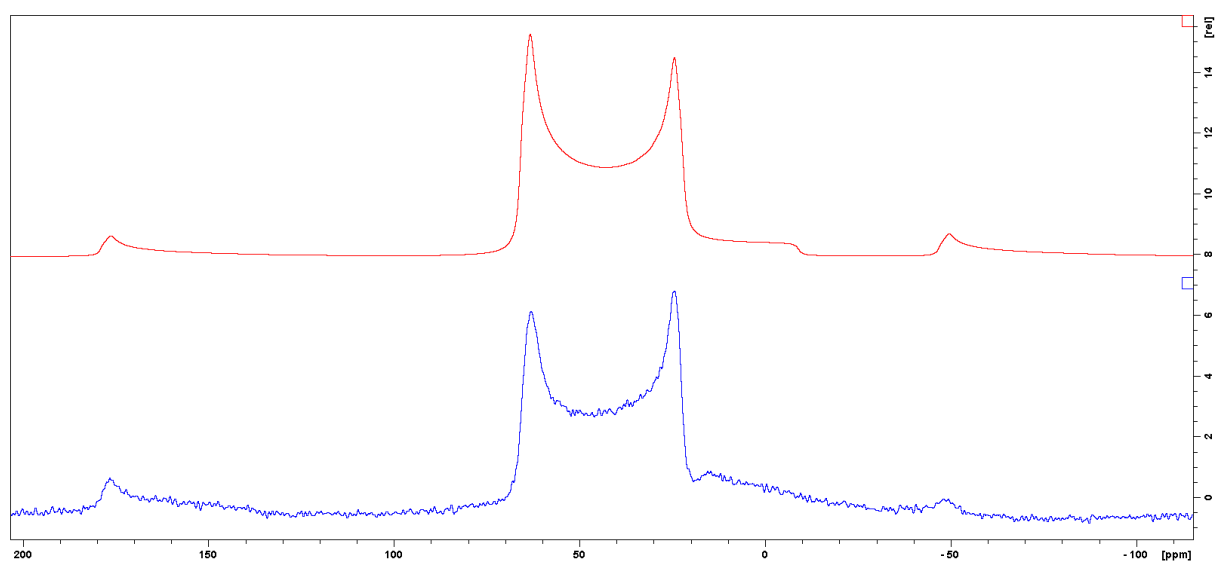

**Figure S37.** Solid-state  $^{11}\text{B}\{^1\text{H}\}$  NMR spectrum of **4M** at 128 MHz. (Top: Simulation) isotropic chemical shift  $\delta_{\text{iso}} = 77.0$  ppm, quadrupolar coupling constant  $C_Q = 4.77$  MHz, quadrupolar asymmetry parameter  $\eta_{\text{Quad}} = 0.1$ .

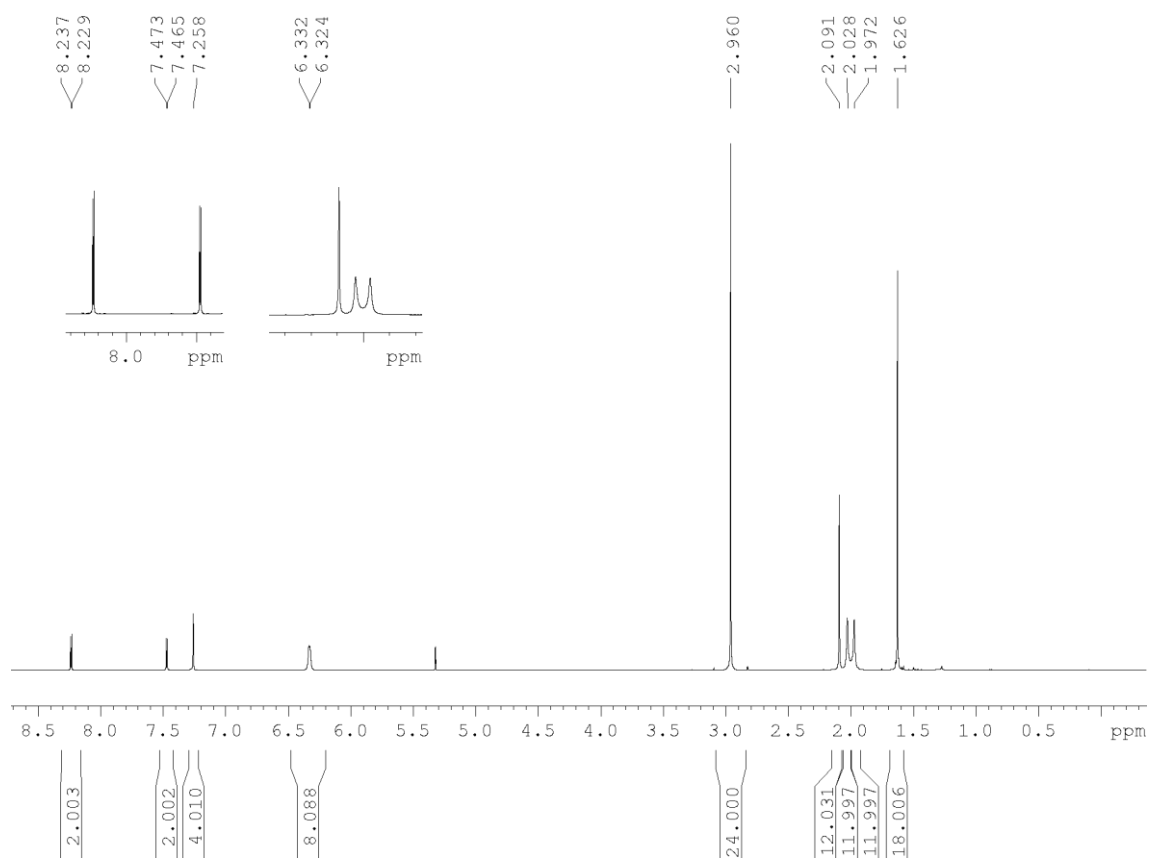

**Figure S38.**  $^1\text{H}$  NMR spectrum of **5** in  $\text{CD}_2\text{Cl}_2$  at 500 MHz.

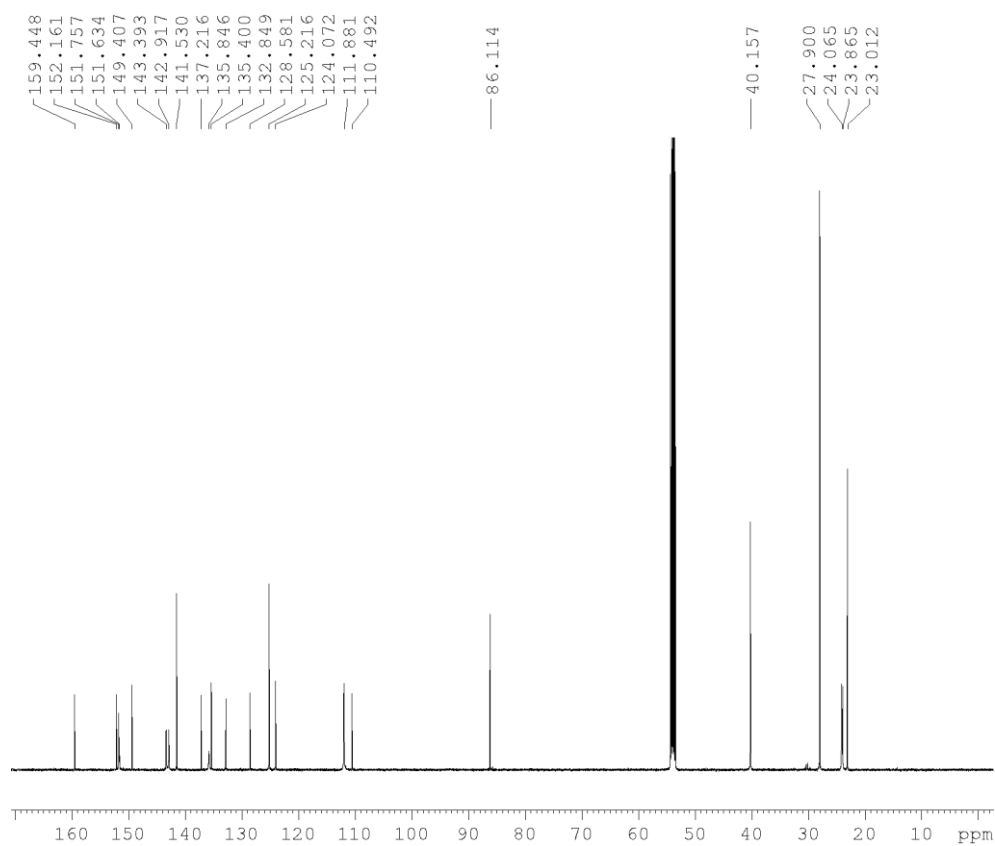

**Figure S39.**  $^{13}\text{C}\{^1\text{H}\}$  NMR spectrum of **5** in  $\text{CD}_2\text{Cl}_2$  at 125 MHz.

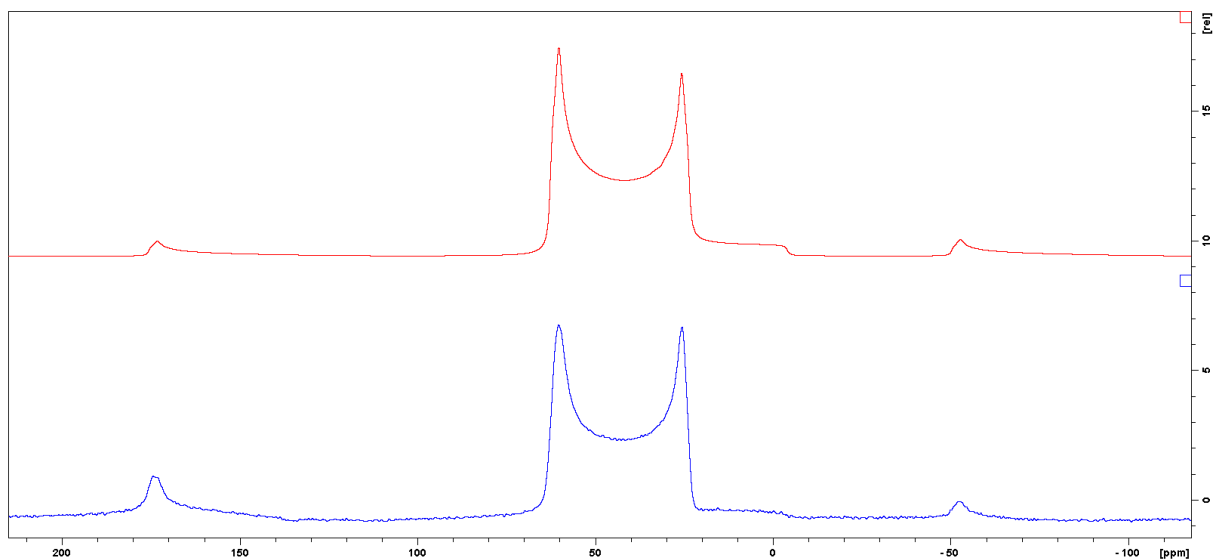

**Figure S40.** Solid-state  $^{11}\text{B}\{^1\text{H}\}$  NMR spectrum of **5** at 128 MHz. (Top: Simulation) isotropic chemical shift  $\delta_{\text{iso}} = 72.5$  ppm, quadrupolar coupling constant  $C_Q = 4.49$  MHz, quadrupolar asymmetry parameter  $\eta_{\text{Quad}} = 0.1$ .

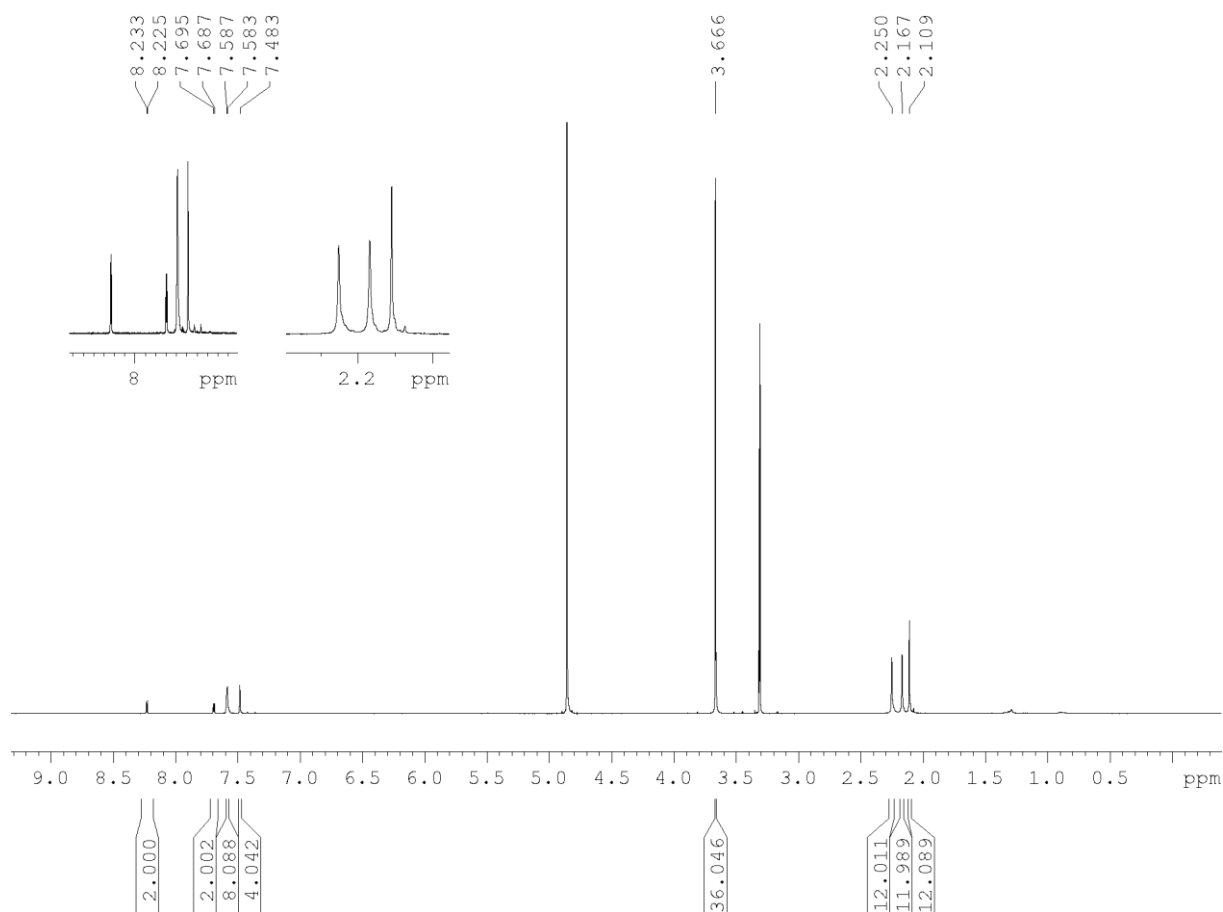

**Figure S41.**  $^1\text{H}$  NMR spectrum of **5M** in  $\text{CD}_3\text{OD}$  at 500 MHz.

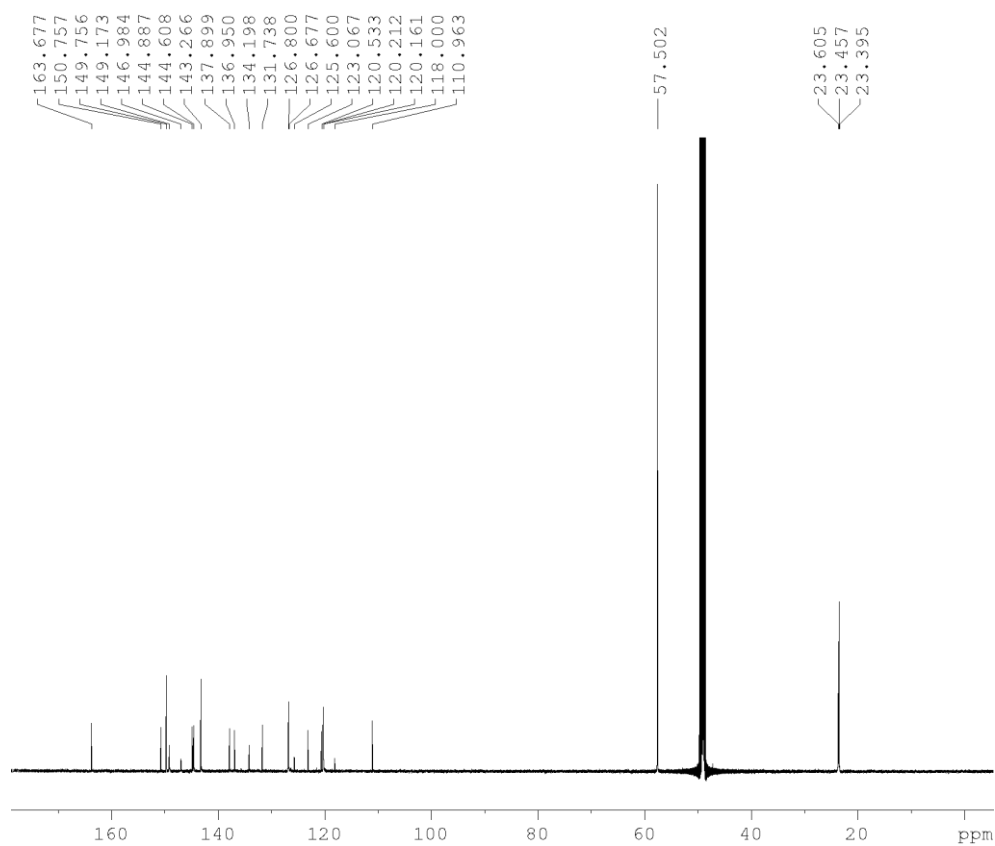

**Figure S42.**  $^{13}\text{C}\{^1\text{H}\}$  NMR spectrum of **5M** in  $\text{CD}_3\text{OD}$  at 125 MHz.

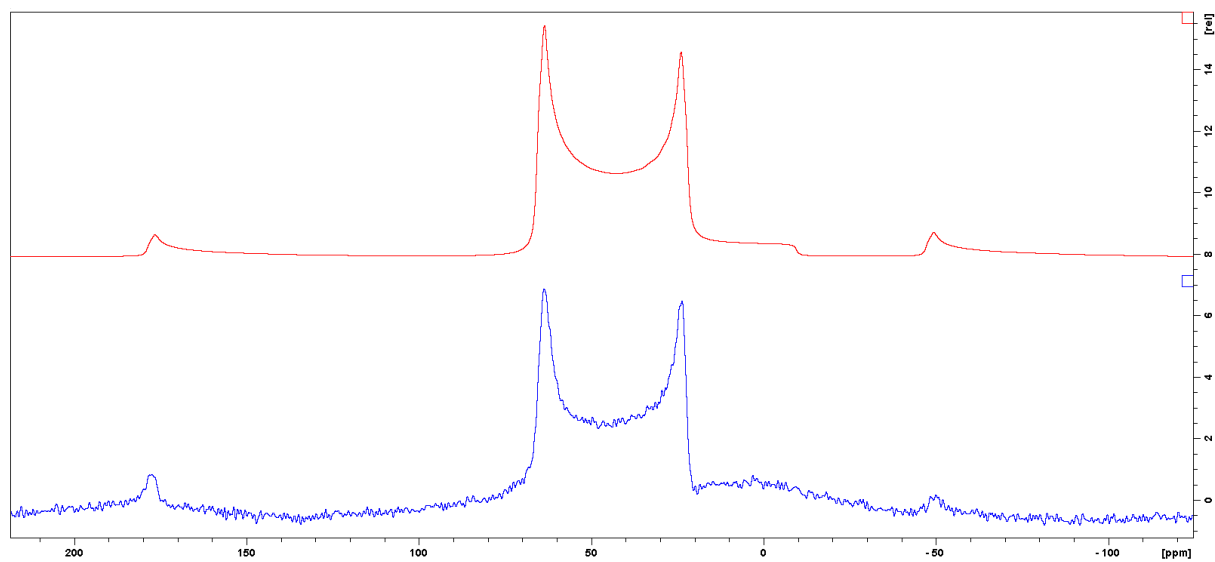

**Figure S43.** Solid-state  $^{11}\text{B}\{^1\text{H}\}$  NMR spectrum of **5M** at 128 MHz. (Top: Simulation) isotropic chemical shift  $\delta_{\text{iso}} = 77.1$  ppm, quadrupolar coupling constant  $C_Q = 4.79$  MHz, quadrupolar asymmetry parameter  $\eta_{\text{Quad}} = 0.0$ .

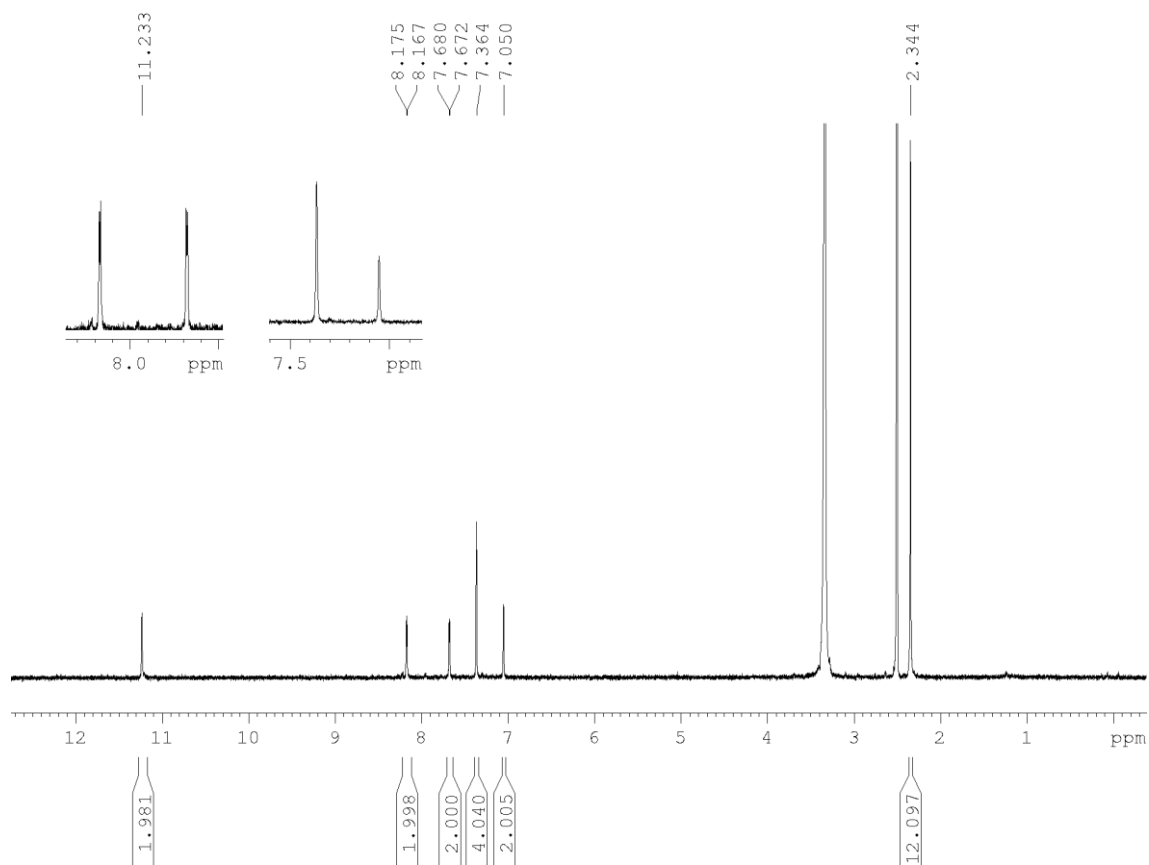

Figure S44.  $^1\text{H}$  NMR spectrum of **5A** in  $\text{d}^6\text{-DMSO}$  at 500 MHz.

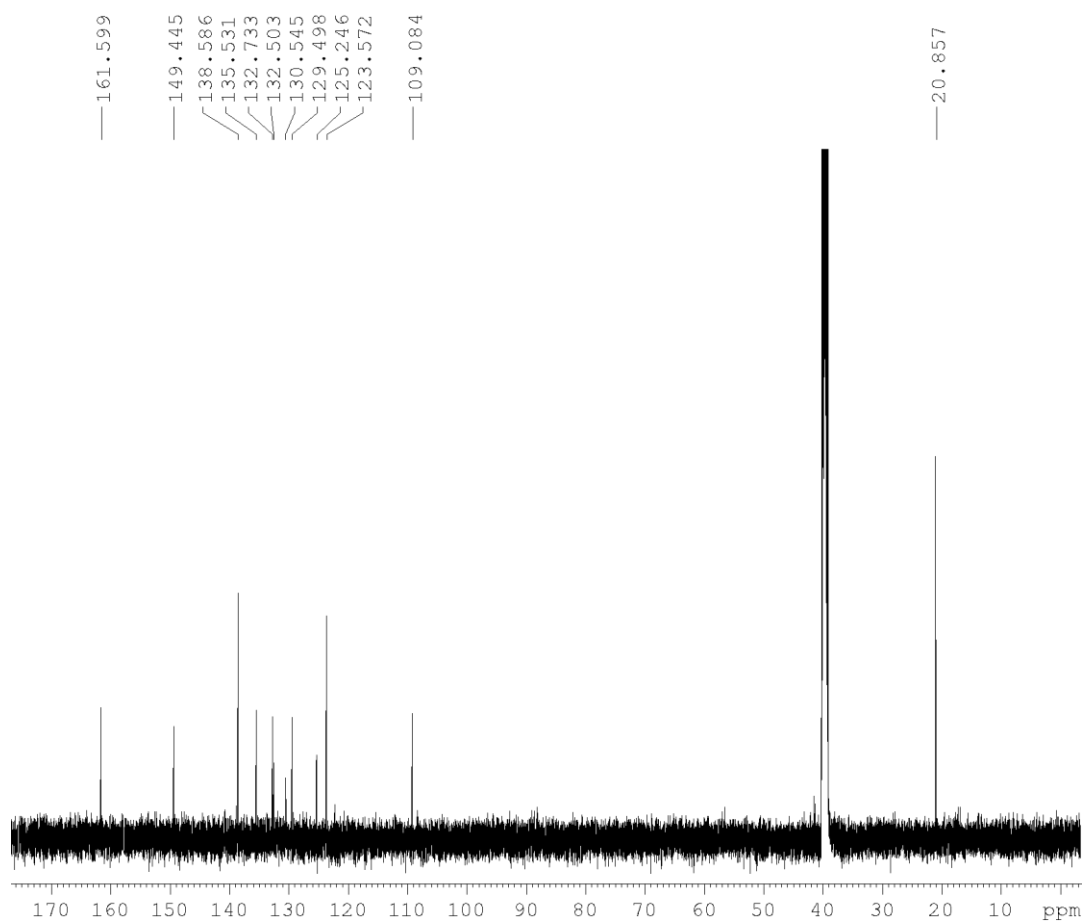

Figure S45.  $^{13}\text{C}\{^1\text{H}\}$  NMR spectrum of **5A** in  $\text{d}^6\text{-DMSO}$  at 125 MHz.

## Cartesian Coordinates for all DFT-Optimized Structures

### Compound 1

DFT B3LYP/6-31G\*, hexane, S<sub>0</sub>

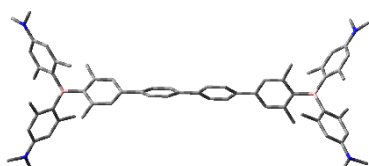

Point group: C<sub>2</sub>

Total energy: -1823763.90 kcal mol<sup>-1</sup>

Dipole moment: 0.57 D

Imaginary frequencies: 0

| Symbol | X         | Y         | Z         |   |           |            |           |
|--------|-----------|-----------|-----------|---|-----------|------------|-----------|
| C      | 0.000081  | 0.741285  | -0.019291 | H | -2.183837 | -8.669865  | 1.664326  |
| C      | 0.000076  | 3.594646  | -0.017680 | H | -2.177935 | -7.147361  | 2.560120  |
| C      | 1.144918  | 1.472035  | 0.342532  | C | 1.538974  | -7.881023  | -2.076696 |
| C      | -1.144652 | 1.472447  | -0.380616 | H | 2.179216  | -8.679706  | -1.687085 |
| C      | -1.145104 | 2.863425  | -0.377929 | H | 2.186810  | -7.155085  | -2.579479 |
| C      | 1.145355  | 2.863005  | 0.341408  | H | 0.895387  | -8.338940  | -2.835091 |
| H      | 2.043537  | 0.942437  | 0.646596  | C | -1.538974 | 7.881023   | -2.076696 |
| H      | -2.043269 | 0.943193  | -0.685282 | H | -0.895387 | 8.338940   | -2.835091 |
| H      | -2.055132 | 3.393611  | -0.644168 | H | -2.179216 | 8.679706   | -1.687085 |
| H      | 2.055393  | 3.392897  | 0.608199  | H | -2.186810 | 7.155085   | -2.579479 |
| C      | -0.000081 | -0.741285 | -0.019291 | C | 1.536761  | 7.876059   | 2.052809  |
| C      | -0.000076 | -3.594646 | -0.017680 | H | 2.183837  | 8.669865   | 1.664326  |
| C      | 1.144652  | -1.472447 | -0.380616 | H | 2.177935  | 7.147361   | 2.560120  |
| C      | -1.144918 | -1.472035 | 0.342532  | H | 0.892438  | 8.339740   | 2.807011  |
| C      | -1.145355 | -2.863005 | 0.341408  | B | 0.000894  | -9.533158  | -0.010505 |
| C      | 1.145104  | -2.863425 | -0.377929 | B | -0.000894 | 9.533158   | -0.010505 |
| H      | 2.043269  | -0.943193 | -0.685282 | C | -0.367473 | -10.313887 | -1.331486 |
| H      | -2.043537 | -0.942437 | 0.646596  | C | -1.005761 | -11.735162 | -3.757090 |
| H      | -2.055393 | -3.392897 | 0.608199  | C | 0.427165  | -11.402310 | -1.793693 |
| H      | 2.055132  | -3.393611 | -0.644168 | C | -1.495996 | -9.968384  | -2.128585 |
| C      | 0.000076  | -5.077308 | -0.016084 | C | -1.809030 | -10.676420 | -3.288639 |
| C      | 0.000577  | -7.939962 | -0.012238 | C | 0.116846  | -12.074114 | -2.975868 |
| C      | 0.728849  | -5.807097 | -0.963839 | H | -2.701998 | -10.392100 | -3.833574 |
| C      | -0.728317 | -5.804834 | 0.933805  | H | 0.771131  | -12.879329 | -3.290167 |
| C      | -0.728027 | -7.201991 | 0.959712  | C | 0.370320  | -10.312661 | 1.311011  |
| C      | 0.729159  | -7.204399 | -0.985947 | C | 1.018832  | -11.743870 | 3.728105  |
| H      | 1.285757  | -5.272458 | -1.729524 | C | -0.427166 | -11.396981 | 1.777041  |
| H      | -1.285057 | -5.268274 | 1.698263  | C | 1.498199  | -9.965546  | 2.108482  |
| C      | -0.000076 | 5.077308  | -0.016084 | C | 1.811361  | -10.673156 | 3.268648  |
| C      | -0.000577 | 7.939962  | -0.012238 | C | -0.116902 | -12.068215 | 2.959726  |
| C      | 0.728317  | 5.804834  | 0.933805  | H | 2.694944  | -10.377390 | 3.822763  |
| C      | -0.728849 | 5.807097  | -0.963839 | H | -0.782298 | -12.859844 | 3.284809  |
| C      | -0.729159 | 7.204399  | -0.985947 | C | -0.370320 | 10.312661  | 1.311011  |
| C      | 0.728027  | 7.201991  | 0.959712  | C | -1.018832 | 11.743870  | 3.728105  |
| H      | 1.285057  | 5.268274  | 1.698263  | C | 0.427166  | 11.396981  | 1.777041  |
| H      | -1.285757 | 5.272458  | -1.729524 | C | -1.498199 | 9.965546   | 2.108482  |
| C      | -1.536761 | -7.876059 | 2.052809  | C | -1.811361 | 10.673156  | 3.268648  |
| H      | -0.892438 | -8.339740 | 2.807011  | C | 0.116902  | 12.068215  | 2.959726  |
|        |           |           |           | H | -2.694944 | 10.377390  | 3.822763  |
|        |           |           |           | H | 0.782298  | 12.859844  | 3.284809  |
|        |           |           |           | C | 0.367473  | 10.313887  | -1.331486 |
|        |           |           |           | C | 1.005761  | 11.735162  | -3.757090 |
|        |           |           |           | C | -0.427165 | 11.402310  | -1.793693 |
|        |           |           |           | C | 1.495996  | 9.968384   | -2.128585 |
|        |           |           |           | C | 1.809030  | 10.676420  | -3.288639 |
|        |           |           |           | C | -0.116846 | 12.074114  | -2.975868 |
|        |           |           |           | H | 2.701998  | 10.392100  | -3.833574 |
|        |           |           |           | H | -0.771131 | 12.879329  | -3.290167 |
|        |           |           |           | C | -1.675679 | -11.865386 | 1.049136  |
|        |           |           |           | H | -1.430988 | -12.405246 | 0.128617  |
|        |           |           |           | H | -2.328259 | -11.035760 | 0.758788  |
|        |           |           |           | H | -2.260436 | -12.537493 | 1.686312  |
|        |           |           |           | C | -2.447202 | -8.848514  | -1.745624 |
|        |           |           |           | H | -1.981898 | -7.863958  | -1.855251 |
|        |           |           |           | H | -2.782386 | -8.923999  | -0.705359 |
|        |           |           |           | H | -3.340231 | -8.868560  | -2.379041 |

|   |           |            |           |
|---|-----------|------------|-----------|
| C | 1.667846  | -11.880091 | -1.058417 |
| H | 2.325676  | -11.055059 | -0.766830 |
| H | 2.250258  | -12.557724 | -1.691784 |
| H | 1.414941  | -12.415963 | -0.137876 |
| C | 2.443208  | -8.838554  | 1.730986  |
| H | 3.334284  | -8.854232  | 2.367230  |
| H | 1.971545  | -7.856994  | 1.839984  |
| H | 2.782446  | -8.910721  | 0.691823  |
| C | 2.447202  | 8.848514   | -1.745624 |
| H | 3.340231  | 8.868560   | -2.379041 |
| H | 1.981898  | 7.863958   | -1.855251 |
| H | 2.782386  | 8.923999   | -0.705359 |
| C | -1.667846 | 11.880091  | -1.058417 |
| H | -1.414941 | 12.415963  | -0.137876 |
| H | -2.325676 | 11.055059  | -0.766830 |
| H | -2.250258 | 12.557724  | -1.691784 |
| C | 1.675679  | 11.865386  | 1.049136  |
| H | 2.328259  | 11.035760  | 0.758788  |
| H | 2.260436  | 12.537493  | 1.686312  |
| H | 1.430988  | 12.405246  | 0.128617  |
| C | -2.443208 | 8.838554   | 1.730986  |
| H | -1.971545 | 7.856994   | 1.839984  |
| H | -2.782446 | 8.910721   | 0.691823  |
| H | -3.334284 | 8.854232   | 2.367230  |
| N | 1.345483  | -12.449356 | 4.877800  |
| N | -1.299280 | -12.406423 | -4.935631 |
| N | -1.345483 | 12.449356  | 4.877800  |
| N | 1.299280  | 12.406423  | -4.935631 |
| C | 0.583384  | 13.628529  | -5.259359 |
| H | 0.940641  | 14.008568  | -6.218606 |
| H | 0.721497  | 14.417322  | -4.502709 |
| H | -0.492724 | 13.441585  | -5.358334 |
| C | 2.555655  | 12.144364  | -5.616083 |
| H | 2.591345  | 12.729334  | -6.537465 |
| H | 2.639030  | 11.086712  | -5.892402 |
| H | 3.436217  | 12.405947  | -5.007191 |
| C | 2.384204  | -11.942104 | 5.758122  |
| H | 3.346204  | -11.876353 | 5.235893  |
| H | 2.510857  | -12.631882 | 6.595066  |
| H | 2.150757  | -10.945098 | 6.164614  |
| C | 0.408455  | -13.422970 | 5.410637  |
| H | 0.194209  | -14.205020 | 4.672807  |
| H | -0.550376 | -12.973655 | 5.716196  |
| H | 0.852953  | -13.906260 | 6.283145  |
| C | -0.408455 | 13.422970  | 5.410637  |
| H | -0.194209 | 14.205020  | 4.672807  |
| H | 0.550376  | 12.973655  | 5.716196  |
| H | -0.852953 | 13.906260  | 6.283145  |
| C | -2.384204 | 11.942104  | 5.758122  |
| H | -3.346204 | 11.876353  | 5.235893  |
| H | -2.510857 | 12.631882  | 6.595066  |
| H | -2.150757 | 10.945098  | 6.164614  |
| C | -2.555655 | -12.144364 | -5.616083 |
| H | -2.591345 | -12.729334 | -6.537465 |
| H | -2.639030 | -11.086712 | -5.892402 |
| H | -3.436217 | -12.405947 | -5.007191 |
| C | -0.583384 | -13.628529 | -5.259359 |
| H | -0.940641 | -14.008568 | -6.218606 |

|   |           |            |           |
|---|-----------|------------|-----------|
| H | -0.721497 | -14.417322 | -4.502709 |
| H | 0.492724  | -13.441585 | -5.358334 |

## Compound 2

DFT B3LYP/6-31G\*, hexane, S<sub>0</sub>

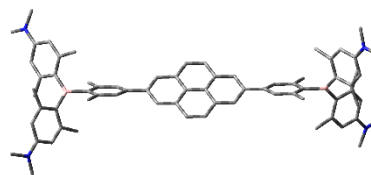

Point group: C<sub>1</sub>

Total energy: -1919385.31 kcal mol<sup>-1</sup>

Dipole moment: 0.82 D

Imaginary frequencies: 0

| Symbol | X         | Y         | Z         |
|--------|-----------|-----------|-----------|
| C      | -0.707661 | 0.018142  | -0.029588 |
| C      | -3.546439 | 0.005920  | -0.024199 |
| C      | -1.429136 | 0.911240  | 0.817689  |
| C      | -1.424647 | -0.880777 | -0.874514 |
| C      | -2.825665 | -0.869664 | -0.851681 |
| C      | -2.830089 | 0.888041  | 0.800191  |
| H      | -3.363528 | -1.579247 | -1.474821 |
| H      | -3.371698 | 1.592900  | 1.425449  |
| C      | 0.715897  | 0.023479  | -0.031466 |
| C      | 3.552824  | 0.031500  | -0.032530 |
| C      | 1.432506  | 0.918448  | 0.818193  |
| C      | 1.436896  | -0.866644 | -0.882496 |
| C      | 2.837970  | -0.841870 | -0.866762 |
| C      | 2.833705  | 0.901689  | 0.801340  |
| H      | 3.381850  | -1.539171 | -1.498778 |
| H      | 3.374101  | 1.601731  | 1.433336  |
| C      | 5.037545  | 0.032622  | -0.030714 |
| C      | 7.898350  | 0.025093  | -0.024817 |
| C      | 5.766401  | -0.135736 | -1.214170 |
| C      | 5.762432  | 0.200075  | 1.155295  |
| C      | 7.159976  | 0.211729  | 1.175158  |
| C      | 7.163951  | -0.154347 | -1.228288 |
| H      | 5.230223  | -0.232711 | -2.155204 |
| H      | 5.222959  | 0.299956  | 2.094123  |
| C      | -5.031100 | -0.001043 | -0.020753 |
| C      | -7.893594 | -0.013993 | -0.013807 |
| C      | -5.757672 | 0.239914  | 1.151885  |
| C      | -5.761126 | -0.249213 | -1.189671 |
| C      | -7.158583 | -0.247953 | -1.207431 |
| C      | -7.154898 | 0.225871  | 1.176440  |
| H      | -5.220374 | 0.412146  | 2.081302  |
| H      | -5.226884 | -0.416959 | -2.121664 |
| C      | 7.832874  | 0.400429  | 2.522555  |
| H      | 8.316213  | 1.379825  | 2.600906  |
| H      | 8.610707  | -0.347681 | 2.711233  |
| H      | 7.098829  | 0.321719  | 3.331516  |

|   |            |           |           |   |            |           |           |
|---|------------|-----------|-----------|---|------------|-----------|-----------|
| C | 7.841646   | -0.344787 | -2.573054 | C | 8.825743   | 2.972958  | -0.537145 |
| H | 8.632743   | 0.391620  | -2.751986 | H | 8.862221   | 4.049181  | -0.735869 |
| H | 7.113775   | -0.248574 | -3.385689 | H | 7.839809   | 2.742795  | -0.121101 |
| H | 8.309099   | -1.331567 | -2.655472 | H | 8.887032   | 2.459716  | -1.502762 |
| C | -7.835671  | -0.517143 | -2.538950 | C | -8.811839  | 2.941505  | -0.520114 |
| H | -8.324234  | 0.378526  | -2.935854 | H | -8.851692  | 4.023123  | -0.686514 |
| H | -8.609980  | -1.289053 | -2.464791 | H | -7.826286  | 2.590678  | -0.842715 |
| H | -7.103428  | -0.857080 | -3.278984 | H | -8.867217  | 2.773920  | 0.560772  |
| C | -7.827937  | 0.487945  | 2.511421  | C | -11.823013 | -1.081168 | -1.682075 |
| H | -8.603868  | 1.258841  | 2.443196  | H | -12.353703 | -1.260900 | -0.741575 |
| H | -7.093825  | 0.826160  | 3.250399  | H | -10.991488 | -1.792807 | -1.711353 |
| H | -8.313643  | -0.410288 | 2.905969  | H | -12.501907 | -1.333736 | -2.503587 |
| B | 9.491958   | 0.011878  | -0.020086 | C | -11.812952 | 1.037135  | 1.675413  |
| B | -9.486818  | -0.018928 | -0.010678 | H | -10.981253 | 1.748637  | 1.703542  |
| C | 10.260094  | -1.195601 | -0.684043 | H | -12.488910 | 1.287226  | 2.500157  |
| C | 11.655941  | -3.387323 | -1.932352 | H | -12.347278 | 1.219485  | 0.737471  |
| C | 11.353978  | -0.979679 | -1.571066 | C | -8.786322  | -2.972585 | 0.510798  |
| C | 9.895922   | -2.551227 | -0.443324 | H | -7.804828  | -2.610364 | 0.833100  |
| C | 10.591992  | -3.605081 | -1.034526 | H | -8.841630  | -2.810902 | -0.570968 |
| C | 12.012921  | -2.047098 | -2.180756 | H | -8.816144  | -4.053695 | 0.682318  |
| H | 10.294186  | -4.616759 | -0.783971 | N | 12.432130  | 4.408183  | 2.474164  |
| H | 12.823160  | -1.822163 | -2.864884 | N | 12.315106  | -4.441210 | -2.549058 |
| C | 10.279783  | 1.204023  | 0.648508  | N | -12.393609 | -3.340889 | 3.826129  |
| C | 11.721697  | 3.366873  | 1.894290  | N | -12.380354 | 3.274351  | -3.881649 |
| C | 11.356842  | 0.965721  | 1.549675  | C | -13.599395 | 2.762764  | -4.484147 |
| C | 9.945253   | 2.566694  | 0.404904  | H | -13.986446 | 3.501023  | -5.189410 |
| C | 10.658427  | 3.606112  | 1.001161  | H | -14.385179 | 2.549368  | -3.742003 |
| C | 12.032914  | 2.019416  | 2.164624  | H | -13.406027 | 1.840143  | -5.044695 |
| H | 10.373472  | 4.623919  | 0.760459  | C | -12.126144 | 4.703041  | -3.947866 |
| H | 12.818436  | 1.777822  | 2.871469  | H | -12.717205 | 5.133895  | -4.758696 |
| C | -10.264064 | -0.922784 | 1.023500  | H | -11.070565 | 4.904033  | -4.165335 |
| C | -11.690770 | -2.550449 | 2.927604  | H | -12.386177 | 5.228386  | -3.014693 |
| C | -11.347031 | -0.404486 | 1.789940  | C | 11.945859  | 5.770454  | 2.338530  |
| C | -9.915268  | -2.283642 | 1.256720  | H | 11.899945  | 6.069879  | 1.284484  |
| C | -10.621035 | -3.066745 | 2.169690  | H | 12.637239  | 6.448353  | 2.843250  |
| C | -12.016377 | -1.194673 | 2.724220  | H | 10.944129  | 5.912316  | 2.774551  |
| H | -10.324935 | -4.102681 | 2.289028  | C | 13.399460  | 4.121637  | 3.519220  |
| H | -12.807107 | -0.735599 | 3.306344  | H | 14.180419  | 3.443347  | 3.155787  |
| C | -10.271061 | 0.881363  | -1.042678 | H | 12.943072  | 3.665229  | 4.412395  |
| C | -11.702728 | 2.501230  | -2.949492 | H | 13.885317  | 5.051737  | 3.821337  |
| C | -11.356538 | 0.359770  | -1.803725 | C | -13.367135 | -2.725809 | 4.711669  |
| C | -9.932048  | 2.245136  | -1.272279 | H | -14.152371 | -2.218531 | 4.139046  |
| C | -10.645487 | 3.026867  | -2.180606 | H | -12.918326 | -1.989388 | 5.397762  |
| C | -12.033554 | 1.148686  | -2.733374 | H | -13.846337 | -3.503010 | 5.310690  |
| H | -10.366668 | 4.069072  | -2.285702 | C | -11.885119 | -4.657507 | 4.171380  |
| H | -12.836496 | 0.692100  | -3.300734 | H | -11.824071 | -5.301554 | 3.285938  |
| C | 11.810592  | -0.433734 | 1.929518  | H | -12.571331 | -5.131733 | 4.876087  |
| H | 12.357851  | -0.919783 | 1.114990  | H | -10.885797 | -4.621995 | 4.633747  |
| H | 10.972728  | -1.092828 | 2.177900  | C | 12.032537  | -5.803899 | -2.132576 |
| H | 12.472227  | -0.397475 | 2.801654  | H | 12.614443  | -6.493637 | -2.747346 |
| C | 8.767364   | -2.935923 | 0.497091  | H | 10.972958  | -6.046335 | -2.276097 |
| H | 7.786216   | -2.700243 | 0.072675  | H | 12.282358  | -5.989078 | -1.075423 |
| H | 8.827959   | -2.414051 | 1.457961  | C | 13.540370  | -4.185409 | -3.286713 |
| H | 8.791163   | -4.010616 | 0.706043  | H | 13.910139  | -5.125053 | -3.702139 |
| C | 11.851876  | 0.409251  | -1.933914 | H | 14.333746  | -3.750013 | -2.658456 |
| H | 11.036002  | 1.093735  | -2.186507 | H | 13.361391  | -3.501489 | -4.125250 |
| H | 12.522145  | 0.360866  | -2.798798 | C | -0.672640  | -1.774396 | -1.715269 |
| H | 12.403010  | 0.873531  | -1.109373 | H | -1.219882  | -2.462155 | -2.355745 |



|   |           |           |           |
|---|-----------|-----------|-----------|
| C | 0.689062  | -1.766583 | -1.720172 |
| H | 1.239554  | -2.447960 | -2.364660 |
| C | -0.681603 | 1.811072  | 1.655800  |
| H | -1.232289 | 2.494902  | 2.297537  |
| C | 0.680138  | 1.813473  | 1.657082  |
| H | 1.227187  | 2.499120  | 2.299982  |

### Compound 3

DFT B3LYP/6-31G\*, hexane, S<sub>0</sub>

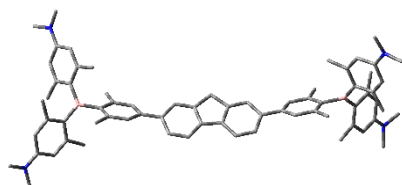

Point group: C<sub>1</sub>

Total energy: -1847671.10 kcal mol<sup>-1</sup>

Dipole moment: 1.17 D

Imaginary frequencies: 0

| Symbol | X         | Y         | Z         |
|--------|-----------|-----------|-----------|
| C      | -0.719240 | -1.168415 | -1.182356 |
| C      | -3.477898 | -0.779274 | -0.777740 |
| C      | -1.637391 | -1.892335 | -1.946529 |
| C      | -1.180958 | -0.249979 | -0.216030 |
| C      | -2.539336 | -0.055864 | -0.014566 |
| C      | -3.000656 | -1.693010 | -1.738561 |
| H      | -1.301010 | -2.611050 | -2.689706 |
| H      | -2.888935 | 0.672824  | 0.712407  |
| H      | -3.716295 | -2.275058 | -2.311981 |
| C      | 0.746649  | -1.159959 | -1.175763 |
| C      | 3.496854  | -0.738821 | -0.746521 |
| C      | 1.679961  | -1.873313 | -1.931475 |
| C      | 1.189003  | -0.236171 | -0.205499 |
| C      | 2.543176  | -0.026274 | 0.008017  |
| C      | 3.038908  | -1.658173 | -1.711275 |
| H      | 1.358613  | -2.595883 | -2.677562 |
| H      | 2.877777  | 0.706174  | 0.738277  |
| H      | 3.766378  | -2.231567 | -2.278521 |
| C      | 4.948673  | -0.525587 | -0.529455 |
| C      | 7.750290  | -0.108426 | -0.108897 |
| C      | 5.465792  | -0.281972 | 0.749474  |
| C      | 5.858512  | -0.557924 | -1.594199 |
| C      | 7.230605  | -0.371142 | -1.405491 |
| C      | 6.827897  | -0.061872 | 0.971466  |
| H      | 4.790991  | -0.287513 | 1.602016  |
| H      | 5.484837  | -0.708709 | -2.604035 |
| C      | -4.933867 | -0.583453 | -0.573745 |
| C      | -7.744244 | -0.203070 | -0.178484 |
| C      | -5.832636 | -0.620864 | -1.647581 |
| C      | -5.466082 | -0.352088 | 0.701149  |
| C      | -6.836310 | -0.179382 | 0.914830  |
| C      | -7.205142 | -0.422245 | -1.475301 |

|   |            |           |           |
|---|------------|-----------|-----------|
| H | -5.448551  | -0.775416 | -2.653043 |
| H | -4.797507  | -0.339663 | 1.558642  |
| C | 8.114670   | -0.431938 | -2.637847 |
| H | 8.741495   | -1.329706 | -2.643288 |
| H | 8.794582   | 0.424269  | -2.708595 |
| H | 7.504162   | -0.442146 | -3.547023 |
| C | 7.264845   | 0.193953  | 2.402407  |
| H | 8.114255   | -0.431025 | 2.699378  |
| H | 6.444320   | -0.016094 | 3.096726  |
| H | 7.574588   | 1.233440  | 2.552120  |
| C | -7.292383  | 0.041794  | 2.345603  |
| H | -7.839895  | -0.822160 | 2.736125  |
| H | -7.960247  | 0.904941  | 2.442749  |
| H | -6.431283  | 0.217708  | 2.999071  |
| C | -8.073125  | -0.463135 | -2.719852 |
| H | -8.941639  | -1.120645 | -2.602120 |
| H | -7.497424  | -0.829845 | -3.576309 |
| H | -8.463625  | 0.527120  | -2.976108 |
| B | 9.308397   | 0.127204  | 0.125114  |
| B | -9.307519  | 0.008563  | 0.041637  |
| C | 9.791194   | 1.414616  | 0.899704  |
| C | 10.651786  | 3.748672  | 2.356625  |
| C | 10.757060  | 1.332559  | 1.944013  |
| C | 9.278875   | 2.711226  | 0.609590  |
| C | 9.718586   | 3.837420  | 1.304773  |
| C | 11.155838  | 2.466369  | 2.651653  |
| H | 9.321524   | 4.803214  | 1.014066  |
| H | 11.876755  | 2.340479  | 3.451352  |
| C | 10.347338  | -0.928723 | -0.418903 |
| C | 12.243637  | -2.842847 | -1.443873 |
| C | 11.502523  | -0.523302 | -1.147243 |
| C | 10.173679  | -2.329878 | -0.232797 |
| C | 11.104406  | -3.246967 | -0.719992 |
| C | 12.401941  | -1.459176 | -1.657961 |
| H | 10.931335  | -4.299709 | -0.528152 |
| H | 13.242474  | -1.094698 | -2.237291 |
| C | -10.072022 | 1.103847  | -0.798891 |
| C | -11.473823 | 3.083576  | -2.356734 |
| C | -11.307401 | 0.812082  | -1.445550 |
| C | -9.561045  | 2.421796  | -0.971786 |
| C | -10.254114 | 3.376614  | -1.715210 |
| C | -11.966081 | 1.770910  | -2.215216 |
| H | -9.827484  | 4.370067  | -1.793046 |
| H | -12.882821 | 1.480666  | -2.715503 |
| C | -10.071322 | -0.879452 | 1.099325  |
| C | -11.441541 | -2.479708 | 3.067128  |
| C | -10.966108 | -0.300684 | 2.045033  |
| C | -9.894693  | -2.290492 | 1.173840  |
| C | -10.579769 | -3.058825 | 2.114669  |
| C | -11.613155 | -1.082680 | 3.001653  |
| H | -10.434559 | -4.132877 | 2.099084  |
| H | -12.264750 | -0.584924 | 3.710702  |
| C | 11.808883  | 0.934027  | -1.448247 |
| H | 12.143601  | 1.472251  | -0.555518 |
| H | 10.937023  | 1.475489  | -1.829244 |
| H | 12.600164  | 1.010725  | -2.201645 |
| C | 8.263232   | 2.956141  | -0.492382 |
| H | 7.271881   | 2.578288  | -0.222507 |

|   |            |           |           |
|---|------------|-----------|-----------|
| H | 8.540694   | 2.467397  | -1.432192 |
| H | 8.167941   | 4.027936  | -0.695988 |
| C | 11.386916  | 0.018683  | 2.374488  |
| H | 10.645563  | -0.774508 | 2.514933  |
| H | 11.920310  | 0.143198  | 3.322905  |
| H | 12.102602  | -0.352366 | 1.633818  |
| C | 8.994902   | -2.908946 | 0.529486  |
| H | 9.155794   | -3.972220 | 0.736216  |
| H | 8.060540   | -2.815424 | -0.033065 |
| H | 8.834290   | -2.409169 | 1.490557  |
| C | -8.991124  | -3.048030 | 0.217042  |
| H | -9.161342  | -4.126619 | 0.300336  |
| H | -7.932587  | -2.860359 | 0.423636  |
| H | -9.161897  | -2.768791 | -0.827972 |
| C | -11.248874 | 1.191207  | 2.097207  |
| H | -11.873774 | 1.517537  | 1.259566  |
| H | -10.334722 | 1.792001  | 2.055480  |
| H | -11.770991 | 1.448904  | 3.024861  |
| C | -11.963148 | -0.556552 | -1.375270 |
| H | -11.256674 | -1.370185 | -1.568657 |
| H | -12.766581 | -0.634105 | -2.115618 |
| H | -12.397239 | -0.749342 | -0.388854 |
| C | -8.259286  | 2.879279  | -0.337611 |
| H | -7.388910  | 2.425577  | -0.822346 |
| H | -8.198910  | 2.618942  | 0.724346  |
| H | -8.155848  | 3.966733  | -0.414802 |
| N | 13.168600  | -3.763375 | -1.916487 |
| N | 11.049251  | 4.868304  | 3.073853  |
| N | -12.160308 | 4.044163  | -3.086339 |
| N | -12.083589 | -3.246235 | 4.029367  |
| C | -13.125357 | -2.645929 | 4.844815  |
| H | -13.504058 | -3.391820 | 5.546601  |
| H | -13.972698 | -2.272169 | 4.248074  |
| H | -12.732386 | -1.808119 | 5.433396  |
| C | -12.016496 | -4.695280 | 3.953429  |
| H | -12.541186 | -5.122692 | 4.810426  |
| H | -10.977463 | -5.042729 | 3.994903  |
| H | -12.472050 | -5.098147 | 3.034384  |
| C | 12.854321  | -5.181212 | -1.870410 |
| H | 12.692343  | -5.515904 | -0.838757 |
| H | 13.697766  | -5.747217 | -2.271103 |
| H | 11.956763  | -5.439188 | -2.454867 |
| C | 14.226924  | -3.321866 | -2.808119 |
| H | 14.846785  | -2.553604 | -2.331082 |
| H | 13.845197  | -2.908920 | -3.755905 |
| H | 14.874615  | -4.169593 | -3.041158 |
| C | -13.315101 | 3.653692  | -3.876248 |
| H | -14.089509 | 3.204697  | -3.243268 |
| H | -13.067155 | 2.932250  | -4.671625 |
| H | -13.745598 | 4.542114  | -4.342991 |
| C | -11.511722 | 5.307472  | -3.393857 |
| H | -11.248479 | 5.848980  | -2.477314 |
| H | -12.202985 | 5.935421  | -3.959676 |
| H | -10.593031 | 5.182462  | -3.988917 |
| C | 10.641868  | 6.188413  | 2.625107  |
| H | 11.011380  | 6.935456  | 3.330671  |
| H | 9.549172   | 6.273048  | 2.596068  |
| H | 11.027862  | 6.439261  | 1.623818  |

|   |           |          |          |
|---|-----------|----------|----------|
| C | 12.169519 | 4.768530 | 3.993515 |
| H | 12.327432 | 5.737895 | 4.470681 |
| H | 13.106408 | 4.472630 | 3.495036 |
| H | 11.965181 | 4.039368 | 4.786782 |
| C | -0.002838 | 0.415091 | 0.469858 |
| H | -0.006642 | 0.241916 | 1.555075 |
| H | -0.008587 | 1.505267 | 0.330964 |

### Compound 4

DFT B3LYP/6-31G\*, hexane, S<sub>0</sub>

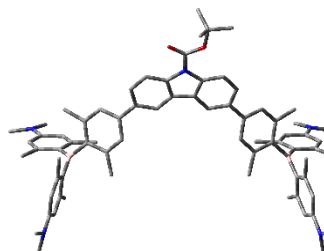

Point group: C<sub>1</sub>

Total energy: -2075924.33 kcal mol<sup>-1</sup>

Dipole moment: 4.27 D

Imaginary frequencies: 0

| Symbol | X         | Y         | Z         |
|--------|-----------|-----------|-----------|
| C      | -1.194946 | 5.048349  | 0.023218  |
| C      | -3.026125 | 2.908277  | 0.004686  |
| C      | -0.739984 | 3.710238  | 0.008320  |
| C      | -2.563475 | 5.325740  | 0.026829  |
| C      | -3.452573 | 4.253034  | 0.017367  |
| C      | -1.648711 | 2.652284  | -0.000003 |
| H      | -2.932976 | 6.339946  | 0.027430  |
| H      | -4.517311 | 4.465537  | -0.007134 |
| H      | -1.287254 | 1.628197  | 0.016694  |
| C      | 0.710865  | 3.739387  | 0.011259  |
| C      | 1.106209  | 5.093136  | 0.028301  |
| N      | -0.059822 | 5.906618  | 0.034333  |
| C      | 2.457785  | 5.442910  | 0.038460  |
| H      | 2.765537  | 6.478261  | 0.041821  |
| C      | 3.395082  | 4.412081  | 0.032295  |
| H      | 4.449144  | 4.672758  | 0.013017  |
| C      | 1.667970  | 2.724509  | 0.005982  |
| H      | 1.357155  | 1.683866  | 0.020336  |
| C      | 3.031203  | 3.048097  | 0.016515  |
| C      | 4.067302  | 1.985508  | 0.010299  |
| C      | 6.062280  | -0.067486 | 0.000946  |
| C      | 3.894911  | 0.805781  | -0.724195 |
| C      | 5.255018  | 2.121118  | 0.739586  |
| C      | 6.233123  | 1.122861  | 0.758705  |
| C      | 4.864176  | -0.200698 | -0.752139 |
| H      | 2.993272  | 0.681011  | -1.319270 |
| H      | 5.409135  | 3.016430  | 1.337181  |
| C      | -4.010270 | 1.797664  | -0.003585 |

|   |            |           |           |   |            |           |           |
|---|------------|-----------|-----------|---|------------|-----------|-----------|
| C | -5.903566  | -0.349488 | -0.014056 | H | 8.170961   | -4.248862 | 0.212471  |
| C | -5.208837  | 1.880225  | 0.715853  | H | 7.413549   | -5.188518 | -1.082080 |
| C | -3.775803  | 0.623525  | -0.729732 | H | 6.475319   | -4.005150 | -0.165921 |
| C | -4.694913  | -0.428973 | -0.757830 | C | 8.070089   | 0.636749  | -2.297699 |
| C | -6.137837  | 0.836118  | 0.734058  | H | 8.612077   | 1.114801  | -3.120500 |
| H | -5.410374  | 2.770161  | 1.307411  | H | 8.519636   | 0.985748  | -1.362155 |
| H | -2.864817  | 0.538740  | -1.317499 | H | 7.042187   | 1.013111  | -2.312100 |
| B | 7.172317   | -1.209448 | -0.004882 | C | -5.070272  | -2.287179 | 2.300602  |
| B | -6.955068  | -1.545987 | -0.017430 | H | -4.775386  | -1.233014 | 2.318653  |
| C | 7.726390   | -1.748379 | -1.380990 | H | -4.676690  | -2.707925 | 1.369453  |
| C | 8.693863   | -2.751520 | -3.904421 | H | -4.560639  | -2.790214 | 3.129146  |
| C | 8.118291   | -0.874765 | -2.434821 | C | -9.919561  | -2.063527 | 0.558610  |
| C | 7.843800   | -3.144925 | -1.637033 | H | -10.914465 | -2.095823 | 1.015424  |
| C | 8.300289   | -3.619498 | -2.866565 | H | -9.904330  | -2.786964 | -0.262946 |
| C | 8.606718   | -1.369712 | -3.643778 | H | -9.797317  | -1.074919 | 0.104422  |
| H | 8.347283   | -4.692550 | -3.013020 | C | -7.085411  | -4.551061 | -0.601276 |
| H | 8.925324   | -0.656382 | -4.395152 | H | -7.802788  | -4.627755 | 0.222102  |
| C | 7.702505   | -1.785923 | 1.365369  | H | -6.118737  | -4.305819 | -0.149562 |
| C | 8.691395   | -2.794981 | 3.878132  | H | -6.993316  | -5.541606 | -1.059378 |
| C | 9.096483   | -1.945033 | 1.612771  | C | -7.927285  | 0.233387  | -2.332358 |
| C | 6.823845   | -2.157631 | 2.422342  | H | -8.484937  | 0.677016  | -3.163938 |
| C | 7.311247   | -2.666412 | 3.625956  | H | -6.919066  | 0.659837  | -2.341478 |
| C | 9.564545   | -2.421401 | 2.837250  | H | -8.401808  | 0.567651  | -1.403742 |
| H | 6.593226   | -2.967926 | 4.379917  | C | -4.335217  | -1.640532 | -1.598542 |
| H | 10.636599  | -2.500057 | 2.977303  | H | -4.963620  | -1.716911 | -2.491864 |
| C | -7.464118  | -2.136173 | 1.354892  | H | -4.456412  | -2.581067 | -1.049790 |
| C | -8.417752  | -3.167822 | 3.872155  | H | -3.291561  | -1.583394 | -1.925478 |
| C | -6.574827  | -2.453330 | 2.420753  | C | -7.389159  | 1.036501  | 1.569565  |
| C | -8.850052  | -2.362238 | 1.595592  | H | -7.466063  | 2.077821  | 1.900078  |
| C | -9.301695  | -2.848773 | 2.822210  | H | -7.389571  | 0.400147  | 2.460495  |
| C | -7.044060  | -2.973521 | 3.626672  | H | -8.304192  | 0.799232  | 1.015611  |
| H | -10.369381 | -2.979354 | 2.956727  | N | 9.137385   | -3.235307 | -5.127377 |
| H | -6.316761  | -3.231939 | 4.387705  | N | -8.782614  | -3.711360 | -5.133280 |
| C | -7.472299  | -2.123573 | -1.391948 | N | -8.879578  | -3.642110 | 5.091894  |
| C | -8.371772  | -3.195520 | -3.912291 | N | 9.169061   | -3.258590 | 5.096037  |
| C | -7.518778  | -3.526485 | -1.636002 | C | 10.578125  | -3.583576 | 5.235130  |
| C | -7.899683  | -1.279773 | -2.456256 | H | 10.768418  | -3.918181 | 6.256967  |
| C | -8.354803  | -1.808777 | -3.663712 | H | 10.903446  | -4.378853 | 4.545469  |
| C | -7.942753  | -4.033796 | -2.864055 | H | 11.205973  | -2.702884 | 5.053697  |
| H | -8.703236  | -1.118789 | -4.423597 | C | 8.238203   | -3.797015 | 6.072514  |
| H | -7.935428  | -5.109068 | -3.001197 | H | 8.787060   | -4.071892 | 6.975659  |
| C | 4.569903   | -1.422714 | -1.603157 | H | 7.489602   | -3.047766 | 6.355746  |
| H | 5.207522   | -1.462504 | -2.492322 | H | 7.703560   | -4.689484 | 5.708929  |
| H | 3.527014   | -1.414187 | -1.937443 | C | -10.271512 | -4.035907 | 5.226008  |
| H | 4.732763   | -2.359954 | -1.059496 | H | -10.552045 | -4.853306 | 4.542623  |
| C | 7.467063   | 1.377979  | 1.605128  | H | -10.451332 | -4.369520 | 6.250048  |
| H | 7.489810   | 2.418979  | 1.944533  | H | -10.941565 | -3.189679 | 5.031892  |
| H | 8.396703   | 1.191186  | 1.056127  | C | -7.929431  | -4.122143 | 6.080258  |
| H | 7.492843   | 0.734961  | 2.490916  | H | -7.221005  | -3.333215 | 6.358975  |
| C | 5.313625   | -2.064499 | 2.294476  | H | -8.469813  | -4.413578 | 6.983310  |
| H | 4.967555   | -1.026157 | 2.317536  | H | -7.348665  | -4.990973 | 5.730504  |
| H | 4.824682   | -2.597514 | 3.116741  | C | -9.378141  | -2.828015 | -6.120673 |
| H | 4.946254   | -2.497622 | 1.358254  | H | -8.684928  | -2.025075 | -6.397809 |
| C | 10.155800  | -1.581892 | 0.585994  | H | -9.598528  | -3.399490 | -7.024697 |
| H | 11.148311  | -1.568975 | 1.048951  | H | -10.313595 | -2.362257 | -5.770712 |
| H | 9.986583   | -0.595796 | 0.141552  | C | -8.992709  | -5.142160 | -5.271880 |
| H | 10.181984  | -2.296216 | -0.243205 | H | -9.300598  | -5.360462 | -6.296489 |
| C | 7.455103   | -4.199058 | -0.614303 | H | -8.066757  | -5.697591 | -5.079796 |

|   |           |           |           |
|---|-----------|-----------|-----------|
| H | -9.766658 | -5.528280 | -4.589447 |
| C | 9.697900  | -2.314720 | -6.101177 |
| H | 9.952591  | -2.866019 | -7.008736 |
| H | 8.969283  | -1.543152 | -6.376501 |
| H | 10.607135 | -1.808202 | -5.738885 |
| C | 9.420441  | -4.652381 | -5.276270 |
| H | 10.209448 | -5.004804 | -4.592752 |
| H | 8.522754  | -5.255356 | -5.093753 |
| H | 9.744063  | -4.846312 | -6.300959 |
| C | -0.008764 | 7.300675  | 0.053261  |
| O | 1.035616  | 7.925072  | 0.063504  |
| O | -1.242136 | 7.832696  | 0.058159  |
| C | -1.433636 | 9.300378  | 0.077085  |
| C | -2.958679 | 9.433063  | 0.076117  |
| H | -3.240369 | 10.491023 | 0.089884  |
| H | -3.388546 | 8.973898  | -0.820087 |
| H | -3.391680 | 8.949881  | 0.958065  |
| C | -0.839282 | 9.888061  | 1.360598  |
| H | -1.255234 | 9.382798  | 2.239056  |
| H | 0.246870  | 9.789524  | 1.376147  |
| H | -1.097605 | 10.950934 | 1.426422  |
| C | -0.834746 | 9.921563  | -1.188416 |
| H | 0.251470  | 9.823536  | -1.202700 |
| H | -1.247490 | 9.439494  | -2.081307 |
| H | -1.093037 | 10.985768 | -1.227261 |

## Compound 5

DFT B3LYP/6-31G\*, hexane, S<sub>0</sub>

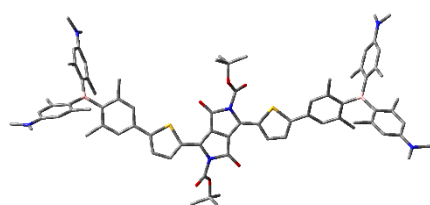

Point group: C<sub>1</sub>

Total energy: -2968846.10 kcal mol<sup>-1</sup>

Dipole moment: 3.34 D

Imaginary frequencies: 0

| Symbol | X         | Y         | Z         |
|--------|-----------|-----------|-----------|
| C      | 1.374695  | -1.219918 | -0.622890 |
| N      | 0.625081  | -0.086907 | -0.233258 |
| C      | -0.808036 | -0.391054 | -0.159122 |
| O      | -1.667888 | 0.442059  | 0.057226  |
| C      | -0.861280 | -1.801159 | -0.478008 |
| C      | 0.456922  | -2.258575 | -0.766481 |
| C      | -1.768028 | -2.853359 | -0.517807 |
| N      | -1.008898 | -3.991672 | -0.881034 |
| C      | 0.397932  | -3.679061 | -1.029279 |
| O      | 1.240624  | -4.526275 | -1.294647 |
| C      | -3.189039 | -2.839269 | -0.294964 |

|   |            |           |           |
|---|------------|-----------|-----------|
| C | -4.065626  | -3.879718 | -0.002597 |
| H | -3.735528  | -4.897670 | 0.143024  |
| C | -5.402416  | -3.466435 | 0.143459  |
| H | -6.205607  | -4.144384 | 0.409553  |
| C | -5.591767  | -2.105670 | -0.029413 |
| S | -4.076908  | -1.315713 | -0.372021 |
| C | 2.805220   | -1.306137 | -0.707143 |
| C | 3.498710   | -2.472677 | -1.029792 |
| H | 2.987324   | -3.390999 | -1.296566 |
| C | 4.893428   | -2.346833 | -0.926372 |
| H | 5.577500   | -3.165526 | -1.118052 |
| C | 5.315437   | -1.093504 | -0.511640 |
| S | 3.947422   | -0.032100 | -0.296069 |
| C | 6.684350   | -0.624027 | -0.298170 |
| C | 9.372913   | 0.258878  | 0.111864  |
| C | 7.766192   | -1.278074 | -0.907998 |
| C | 6.971459   | 0.479647  | 0.518424  |
| C | 8.276658   | 0.934086  | 0.714661  |
| C | 9.084940   | -0.870529 | -0.703197 |
| H | 7.573644   | -2.114328 | -1.574332 |
| H | 6.158086   | 0.990241  | 1.028411  |
| C | -6.842146  | -1.349586 | 0.058018  |
| C | -9.303115  | 0.094534  | 0.231708  |
| C | -6.861011  | 0.020956  | 0.354578  |
| C | -8.074905  | -1.985518 | -0.154105 |
| C | -9.285509  | -1.298443 | -0.054962 |
| C | -8.053418  | 0.743869  | 0.426200  |
| H | -5.923767  | 0.535499  | 0.552572  |
| H | -8.089216  | -3.038618 | -0.421813 |
| C | 8.462202   | 2.145737  | 1.609121  |
| H | 8.765375   | 3.027828  | 1.035938  |
| H | 9.232268   | 1.987992  | 2.372033  |
| H | 7.528574   | 2.385878  | 2.128430  |
| C | 10.172553  | -1.661789 | -1.405978 |
| H | 10.875024  | -1.017632 | -1.946011 |
| H | 9.734808   | -2.353291 | -2.133547 |
| H | 10.766813  | -2.248693 | -0.698207 |
| C | -7.947756  | 2.223808  | 0.744540  |
| H | -8.198461  | 2.842165  | -0.123423 |
| H | -6.929019  | 2.477149  | 1.055529  |
| H | -8.624002  | 2.527180  | 1.551168  |
| C | -10.555679 | -2.093919 | -0.293743 |
| H | -10.318112 | -3.083773 | -0.697559 |
| H | -11.229511 | -1.602192 | -1.003748 |
| H | -11.124456 | -2.234890 | 0.631035  |
| B | 10.872995  | 0.751939  | 0.339840  |
| B | -10.676416 | 0.899575  | 0.332393  |
| C | 11.956096  | -0.276631 | 0.844834  |
| C | 13.235850  | -0.366779 | 0.223898  |
| C | 11.708424  | -1.175174 | 1.921871  |
| C | 12.679114  | -2.079888 | 2.350005  |
| C | 14.178917  | -1.304269 | 0.643782  |
| H | 12.447813  | -2.712227 | 3.199415  |
| H | 15.126646  | -1.343942 | 0.119154  |
| C | 11.243384  | 2.257808  | 0.055728  |
| C | 12.010261  | 3.018414  | 0.985848  |
| C | 10.817058  | 2.937412  | -1.121311 |
| C | 11.152085  | 4.271258  | -1.350546 |

|   |            |           |           |   |            |           |           |
|---|------------|-----------|-----------|---|------------|-----------|-----------|
| C | 12.302688  | 4.362036  | 0.754279  | H | 16.730399  | -2.108084 | 1.808701  |
| H | 10.832528  | 4.724628  | -2.281756 | H | 16.814485  | -3.872776 | 2.000609  |
| H | 12.868854  | 4.897663  | 1.507663  | H | 16.218682  | -3.182562 | 0.488662  |
| C | -10.871273 | 2.210010  | -0.522203 | C | 14.646647  | -3.897542 | 3.323510  |
| C | -10.518112 | 2.278674  | -1.900360 | H | 13.720370  | -4.479189 | 3.246487  |
| C | -11.395779 | 3.400946  | 0.059221  | H | 15.469226  | -4.603438 | 3.454917  |
| C | -11.531227 | 4.571133  | -0.686996 | H | 14.580560  | -3.273194 | 4.228949  |
| C | -10.696270 | 3.448570  | -2.637641 | C | 11.866330  | 6.971932  | -1.914758 |
| H | -11.912940 | 5.453600  | -0.186415 | H | 10.794962  | 6.898418  | -2.136098 |
| H | -10.445490 | 3.430279  | -3.691974 | H | 12.124249  | 8.032389  | -1.881683 |
| C | -11.815217 | 0.368803  | 1.285643  | H | 12.417367  | 6.509303  | -2.749200 |
| C | -13.165764 | 0.271507  | 0.841045  | C | 13.104363  | 7.051281  | 0.252387  |
| C | -11.553777 | -0.056828 | 2.619369  | H | 12.738415  | 7.053717  | 1.286416  |
| C | -12.574950 | -0.526659 | 3.444443  | H | 14.107727  | 6.596819  | 0.249553  |
| C | -14.165501 | -0.235900 | 1.670428  | H | 13.199558  | 8.091380  | -0.065679 |
| H | -12.322942 | -0.800031 | 4.462593  | C | -16.290528 | -1.072023 | 3.377274  |
| H | -15.170615 | -0.308993 | 1.271140  | H | -16.928133 | -1.532375 | 4.134680  |
| C | 10.015060  | 2.249865  | -2.211966 | H | -16.625590 | -0.033068 | 3.229666  |
| H | 9.986259   | 2.867638  | -3.115566 | H | -16.449686 | -1.614204 | 2.437244  |
| H | 8.981091   | 2.066725  | -1.902223 | C | -14.628786 | -1.418854 | 5.207260  |
| H | 10.437348  | 1.279295  | -2.492259 | H | -15.515772 | -1.854538 | 5.671693  |
| C | 12.526881  | 2.436770  | 2.290961  | H | -13.808926 | -2.138021 | 5.320296  |
| H | 13.353441  | 1.737810  | 2.127287  | H | -14.359822 | -0.507756 | 5.765542  |
| H | 11.755997  | 1.883754  | 2.837102  | C | -11.104944 | 5.784496  | -4.218523 |
| H | 12.888299  | 3.234913  | 2.948029  | H | -11.208822 | 6.798689  | -4.609455 |
| C | 10.401308  | -1.176880 | 2.694534  | H | -10.093012 | 5.438445  | -4.460341 |
| H | 9.580175   | -1.595941 | 2.104000  | H | -11.820708 | 5.136006  | -4.748792 |
| H | 10.092401  | -0.170056 | 2.994497  | C | -12.018951 | 6.936982  | -2.200672 |
| H | 10.494309  | -1.775971 | 3.606369  | H | -13.066020 | 6.706453  | -1.948003 |
| C | 13.644089  | 0.516478  | -0.942998 | H | -11.520410 | 7.283797  | -1.287256 |
| H | 14.562024  | 0.138226  | -1.405294 | H | -12.013661 | 7.764276  | -2.913137 |
| H | 13.828362  | 1.548751  | -0.628441 | C | -1.450642  | -5.321658 | -1.170562 |
| H | 12.876788  | 0.561623  | -1.722485 | C | 1.058697   | 1.267353  | -0.299424 |
| C | -9.970506  | 1.083271  | -2.659842 | O | -2.040065  | -6.023229 | -0.378343 |
| H | -10.556475 | 0.174504  | -2.487050 | O | 1.792662   | 1.682074  | -1.171388 |
| H | -8.940065  | 0.854378  | -2.369324 | O | 0.534659   | 1.943267  | 0.714014  |
| H | -9.976578  | 1.276916  | -3.737577 | O | -1.086482  | -5.632537 | -2.406858 |
| C | -11.806929 | 3.487373  | 1.519357  | C | 0.516906   | 3.425044  | 0.729190  |
| H | -12.736606 | 2.943083  | 1.714528  | C | -0.319686  | 3.719525  | 1.975341  |
| H | -11.962736 | 4.531489  | 1.810863  | H | -1.312598  | 3.270339  | 1.880713  |
| H | -11.053130 | 3.066240  | 2.192202  | H | 0.161305   | 3.309212  | 2.869114  |
| C | -13.598626 | 0.677265  | -0.557698 | H | -0.429580  | 4.801320  | 2.105407  |
| H | -14.612723 | 0.318183  | -0.762908 | C | 1.944738   | 3.956484  | 0.876171  |
| H | -12.941737 | 0.271211  | -1.333619 | H | 2.425589   | 3.520571  | 1.758582  |
| H | -13.595813 | 1.764453  | -0.686202 | H | 2.545470   | 3.724243  | -0.004850 |
| C | -10.168819 | 0.013122  | 3.237931  | H | 1.916176   | 5.044232  | 1.007103  |
| H | -9.499264  | -0.747330 | 2.823175  | C | -0.180291  | 3.937952  | -0.533804 |
| H | -10.222432 | -0.145688 | 4.320039  | H | -0.330781  | 5.020035  | -0.451130 |
| H | -9.686028  | 0.981982  | 3.072777  | H | 0.414381   | 3.739704  | -1.428023 |
| C | -11.187511 | 4.632630  | -2.052406 | H | -1.157902  | 3.457837  | -0.642542 |
| N | -11.319072 | 5.804313  | -2.781877 | C | -1.096696  | -7.035843 | -2.892375 |
| C | -13.903801 | -0.649542 | 2.991982  | C | -0.242774  | -7.901741 | -1.962459 |
| C | 11.885260  | 5.028599  | -0.415266 | H | -0.717251  | -8.033843 | -0.988033 |
| C | 13.932465  | -2.186708 | 1.714716  | H | -0.102082  | -8.888940 | -2.416347 |
| N | -14.904755 | -1.160609 | 3.804584  | H | 0.738278   | -7.439109 | -1.817941 |
| N | 14.875120  | -3.120138 | 2.117761  | C | -2.541335  | -7.527566 | -3.006322 |
| N | 12.175482  | 6.367031  | -0.630643 | H | -2.551783  | -8.520168 | -3.470550 |
| C | 16.222752  | -3.058134 | 1.578415  | H | -3.013808  | -7.596061 | -2.024865 |

|   |           |           |           |
|---|-----------|-----------|-----------|
| H | -3.128046 | -6.851136 | -3.637203 |
| C | -0.443877 | -6.899660 | -4.268719 |
| H | -1.026923 | -6.229865 | -4.908938 |
| H | 0.567421  | -6.493406 | -4.172713 |
| H | -0.385836 | -7.879975 | -4.753146 |

### Compound 1M

DFT B3LYP/6-31G\*, water, S<sub>0</sub>

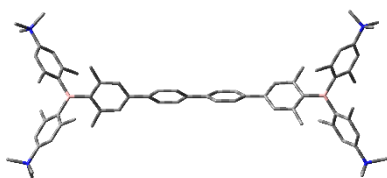

Point group: C<sub>1</sub>

Total energy: -1923472.14 kcal mol<sup>-1</sup>

Imaginary frequencies: 0

| Symbol | X         | Y         | Z         |
|--------|-----------|-----------|-----------|
| C      | 7.202000  | 1.029646  | -0.661782 |
| C      | 5.806970  | 1.001786  | -0.667812 |
| C      | 5.071793  | 0.026002  | 0.020497  |
| C      | 5.798649  | -0.952999 | 0.713125  |
| C      | 7.193453  | -0.989458 | 0.711149  |
| C      | 7.942237  | 0.016678  | 0.024372  |
| H      | 5.272940  | 1.783541  | -1.200498 |
| H      | 5.258284  | -1.730784 | 1.245288  |
| C      | 3.589766  | 0.028813  | 0.015387  |
| C      | 2.856576  | -0.358803 | 1.150972  |
| C      | 2.866716  | 0.418181  | -1.126126 |
| C      | 1.465570  | -0.352988 | 1.146125  |
| H      | 3.379524  | -0.647082 | 2.058311  |
| C      | 1.475728  | 0.414665  | -1.133056 |
| H      | 3.397747  | 0.705675  | -2.029010 |
| C      | 0.742102  | 0.031150  | 0.003379  |
| H      | 0.932612  | -0.671457 | 2.037196  |
| H      | 0.950789  | 0.734057  | -2.028550 |
| C      | -0.742221 | 0.031145  | -0.003169 |
| C      | -1.465683 | -0.353183 | -1.145853 |
| C      | -1.475853 | 0.414860  | 1.133197  |
| C      | -2.856689 | -0.359000 | -1.150704 |
| H      | -0.932723 | -0.671799 | -2.036869 |
| C      | -2.866840 | 0.418375  | 1.126261  |
| H      | -0.950916 | 0.734410  | 2.028636  |
| C      | -3.589884 | 0.028805  | -0.015187 |
| H      | -3.379631 | -0.647434 | -2.057997 |
| H      | -3.397875 | 0.706028  | 2.029092  |
| C      | -5.071910 | 0.025978  | -0.020306 |
| C      | -5.807108 | 1.001873  | 0.667815  |
| C      | -5.798744 | -0.953175 | -0.712750 |
| C      | -7.202144 | 1.029714  | 0.661762  |
| H      | -5.273092 | 1.783721  | 1.200379  |
| C      | -7.193544 | -0.989666 | -0.710772 |
| H      | -5.258357 | -1.731054 | -1.244750 |

|   |            |           |           |
|---|------------|-----------|-----------|
| C | -7.942355  | 0.016609  | -0.024212 |
| B | -9.509013  | 0.006613  | -0.018858 |
| B | 9.508900   | 0.006656  | 0.018935  |
| C | -10.339761 | 1.360048  | -0.245825 |
| C | -10.094118 | 2.153167  | -1.395948 |
| C | -11.339120 | 1.799845  | 0.663938  |
| C | -10.827459 | 3.330310  | -1.623259 |
| C | -12.039218 | 2.988842  | 0.430388  |
| C | -11.785717 | 3.747665  | -0.709557 |
| H | -10.610812 | 3.892642  | -2.522251 |
| H | -12.781190 | 3.296592  | 1.159944  |
| C | 10.339803  | 1.360026  | 0.245773  |
| C | 10.094351  | 2.153203  | 1.395910  |
| C | 11.339152  | 1.799679  | -0.664057 |
| C | 10.827919  | 3.330207  | 1.623186  |
| C | 12.039483  | 2.988553  | -0.430541 |
| C | 11.786211  | 3.747391  | 0.709436  |
| H | 10.611433  | 3.892581  | 2.522190  |
| H | 12.781432  | 3.296197  | -1.160163 |
| C | -10.319016 | -1.358499 | 0.215057  |
| C | -10.045498 | -2.153942 | 1.362446  |
| C | -11.319706 | -1.810247 | -0.681407 |
| C | -10.756107 | -3.339321 | 1.586291  |
| C | -12.003518 | -3.014970 | -0.448565 |
| C | -11.721810 | -3.771445 | 0.681137  |
| H | -10.524388 | -3.910979 | 2.479181  |
| H | -12.746677 | -3.322627 | -1.172582 |
| C | 10.318831  | -1.358501 | -0.215053 |
| C | 10.045019  | -2.154072 | -1.362274 |
| C | 11.319763  | -1.810150 | 0.681198  |
| C | 10.755590  | -3.339471 | -1.586186 |
| C | 12.003522  | -3.014889 | 0.448311  |
| C | 11.721531  | -3.771489 | -0.681244 |
| H | 10.523630  | -3.911225 | -2.478950 |
| H | 12.746860  | -3.322468 | 1.172176  |
| C | -7.840830  | -2.118639 | -1.492337 |
| H | -8.659715  | -1.777153 | -2.133279 |
| H | -7.104940  | -2.601795 | -2.141238 |
| H | -8.248517  | -2.892185 | -0.831967 |
| C | -7.858372  | 2.155969  | 1.439683  |
| H | -7.123466  | 2.655524  | 2.077105  |
| H | -8.284099  | 2.917233  | 0.776636  |
| H | -8.665727  | 1.808043  | 2.091887  |
| C | 7.840766   | -2.118268 | 1.492926  |
| H | 7.104991   | -2.601053 | 2.142235  |
| H | 8.248103   | -2.892135 | 0.832713  |
| H | 8.659920   | -1.776704 | 2.133477  |
| C | 7.858232   | 2.155742  | -1.439921 |
| H | 7.123244   | 2.655456  | -2.077124 |
| H | 8.284352   | 2.916915  | -0.777026 |
| H | 8.665297   | 1.807609  | -2.092377 |
| C | -11.682344 | -1.053380 | -1.942878 |
| H | -12.108497 | -0.072027 | -1.714702 |
| H | -10.809534 | -0.887682 | -2.583992 |
| H | -12.416104 | -1.604795 | -2.537300 |
| C | -8.996280  | -1.780908 | 2.390925  |
| H | -7.985855  | -1.953668 | 2.006614  |
| H | -9.048362  | -0.727229 | 2.678524  |

|   |            |           |           |
|---|------------|-----------|-----------|
| H | -9.114062  | -2.375325 | 3.301645  |
| C | -9.048811  | 1.796311  | -2.434733 |
| H | -8.038859  | 2.007888  | -2.068299 |
| H | -9.070483  | 0.737361  | -2.705515 |
| H | -9.198206  | 2.372351  | -3.352608 |
| C | -11.672800 | 1.041032  | 1.931611  |
| H | -12.071746 | 0.046540  | 1.711608  |
| H | -10.791367 | 0.904262  | 2.567983  |
| H | -12.418365 | 1.575070  | 2.527264  |
| C | -14.057845 | 4.710501  | -0.973131 |
| H | -14.367799 | 4.252285  | -0.036090 |
| H | -14.604554 | 5.641738  | -1.130223 |
| H | -14.230797 | 4.022460  | -1.800951 |
| C | -12.213340 | 5.739613  | -2.196408 |
| H | -12.423655 | 5.089072  | -3.044613 |
| H | -12.827041 | 6.638272  | -2.260580 |
| H | -11.159492 | 6.014668  | -2.172118 |
| C | -12.304391 | 5.980815  | 0.232020  |
| H | -12.615459 | 5.519863  | 1.167432  |
| H | -11.235092 | 6.191583  | 0.257884  |
| H | -12.871075 | 6.897664  | 0.061334  |
| C | -13.178759 | -4.978689 | 2.286286  |
| H | -13.894023 | -4.158306 | 2.223813  |
| H | -13.696010 | -5.922832 | 2.464766  |
| H | -12.463953 | -4.789601 | 3.084691  |
| C | -13.462012 | -5.421940 | -0.098198 |
| H | -13.926865 | -6.366905 | 0.183687  |
| H | -14.218500 | -4.639245 | -0.143886 |
| H | -12.960298 | -5.531085 | -1.059066 |
| C | -11.440835 | -6.211029 | 1.021644  |
| H | -10.924479 | -6.263641 | 0.062904  |
| H | -10.725774 | -6.021460 | 1.819847  |
| H | -11.980466 | -7.139220 | 1.216826  |
| C | 11.672648  | 1.040822  | -1.931752 |
| H | 12.071944  | 0.046468  | -1.711745 |
| H | 10.791076  | 0.903744  | -2.567857 |
| H | 12.417902  | 1.574997  | -2.527672 |
| C | 9.049034   | 1.796530  | 2.434744  |
| H | 8.039050   | 2.007492  | 2.068061  |
| H | 9.071100   | 0.737734  | 2.706124  |
| H | 9.198081   | 2.373124  | 3.352324  |
| C | 12.305116  | 5.980483  | -0.232144 |
| H | 12.871908  | 6.897269  | -0.061475 |
| H | 12.616071  | 5.519516  | -1.167588 |
| H | 11.235838  | 6.191372  | -0.257935 |
| C | 12.214258  | 5.739229  | 2.196292  |
| H | 11.160474  | 6.014538  | 2.172058  |
| H | 12.424452  | 5.088582  | 3.044444  |
| H | 12.828166  | 6.637746  | 2.260478  |
| C | 14.058506  | 4.709906  | 0.972826  |
| H | 14.605355  | 5.641063  | 1.129903  |
| H | 14.231437  | 4.021809  | 1.800602  |
| H | 14.368324  | 4.251695  | 0.035737  |
| C | 8.995508   | -1.781216 | -2.390521 |
| H | 7.985198   | -1.954070 | -2.005947 |
| H | 9.047390   | -0.727555 | -2.678207 |
| H | 9.113135   | -2.375690 | -3.301224 |
| C | 11.682805  | -1.053118 | 1.942461  |

|   |            |           |           |
|---|------------|-----------|-----------|
| H | 12.109562  | -0.072089 | 1.713995  |
| H | 10.810099  | -0.886692 | 2.583515  |
| H | 12.416232  | -1.604792 | 2.537055  |
| C | 11.440444  | -6.211088 | -1.021463 |
| H | 10.725206  | -6.021590 | -1.819526 |
| H | 11.980006  | -7.139314 | -1.216670 |
| H | 10.924291  | -6.263602 | -0.062607 |
| C | 13.461895  | -5.421945 | 0.097835  |
| H | 14.218402  | -4.639258 | 0.143275  |
| H | 12.960403  | -5.531002 | 1.058832  |
| H | 13.926660  | -6.366946 | -0.184077 |
| C | 13.178094  | -4.978902 | -2.286624 |
| H | 13.893436  | -4.158572 | -2.224364 |
| H | 13.695221  | -5.923100 | -2.465170 |
| H | 12.463105  | -4.789803 | -3.084863 |
| N | 12.443223  | -5.073441 | -0.962463 |
| N | 12.575357  | 5.024316  | 0.915126  |
| N | -12.443581 | -5.073360 | 0.962313  |
| N | -12.574658 | 5.024709  | -0.915294 |

### Compound 1M

DFT B3LYP/6-31G\*, water, S<sub>0</sub>

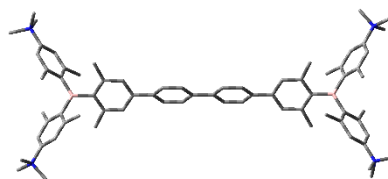

Point group: C<sub>i</sub>

Total energy: -1923554.01 kcal mol<sup>-1</sup>

| Symbol | X         | Y          | Z         |
|--------|-----------|------------|-----------|
| C      | -0.885060 | -7.227200  | -0.830590 |
| C      | -0.852860 | -5.832250  | -0.831010 |
| C      | -0.011800 | -5.099680  | 0.018900  |
| C      | 0.827780  | -5.829140  | 0.873010  |
| C      | 0.860300  | -7.224040  | 0.876900  |
| C      | -0.010950 | -7.970140  | 0.023130  |
| H      | -1.527000 | -5.296140  | -1.492980 |
| H      | 1.500960  | -5.290850  | 1.534230  |
| C      | -0.009720 | -3.617650  | 0.014010  |
| C      | 0.173510  | -2.885450  | 1.200470  |
| C      | -0.189750 | -2.893610  | -1.177970 |
| C      | 0.172350  | -1.494440  | 1.195270  |
| H      | 0.295870  | -3.409130  | 2.144200  |
| C      | -0.181360 | -1.502630  | -1.183570 |
| H      | -0.314930 | -3.423900  | -2.117630 |
| C      | -0.002320 | -0.769990  | 0.003000  |
| H      | 0.330110  | -0.962300  | 2.128770  |
| H      | -0.336430 | -0.976880  | -2.121130 |
| B      | -0.004290 | -9.536820  | 0.018870  |
| C      | -1.378660 | -10.364060 | 0.003130  |
| C      | -2.361580 | -10.116420 | 0.995470  |
| C      | -1.653640 | -11.362270 | -0.970400 |

|   |           |            |           |   |           |            |           |
|---|-----------|------------|-----------|---|-----------|------------|-----------|
| C | -3.562170 | -10.846800 | 1.011310  | H | 4.479570  | -13.932680 | -1.456610 |
| C | -2.866920 | -12.059380 | -0.950500 | H | 6.259430  | -13.739240 | -1.382380 |
| C | -3.814220 | -11.804010 | 0.037900  | H | 5.256470  | -12.504100 | -2.191690 |
| H | -4.273690 | -10.628750 | 1.797140  | N | 5.161420  | -12.484880 | -0.052530 |
| H | -3.043050 | -12.800530 | -1.723260 | N | -5.109510 | -12.589700 | 0.014840  |
| C | 1.378570  | -10.350440 | 0.028950  | C | 0.002320  | 0.769990   | -0.003000 |
| C | 2.364710  | -10.078830 | -0.959870 | C | -0.172350 | 1.494440   | -1.195270 |
| C | 1.662420  | -11.352550 | 0.990380  | C | 0.181360  | 1.502630   | 1.183570  |
| C | 3.569120  | -10.792610 | -0.971540 | C | -0.173510 | 2.885450   | -1.200470 |
| C | 2.887520  | -12.039560 | 0.973300  | H | -0.330110 | 0.962300   | -2.128770 |
| C | 3.832210  | -11.759670 | -0.005000 | C | 0.189750  | 2.893610   | 1.177970  |
| H | 4.289970  | -10.562230 | -1.749380 | H | 0.336430  | 0.976880   | 2.121130  |
| H | 3.060650  | -12.783690 | 1.739740  | C | 0.009720  | 3.617650   | -0.014010 |
| C | 1.831820  | -7.874360  | 1.845210  | H | -0.295870 | 3.409130   | -2.144200 |
| H | 2.194490  | -7.139850  | 2.569800  | H | 0.314930  | 3.423900   | 2.117630  |
| H | 2.708900  | -8.283810  | 1.331640  | C | 0.011800  | 5.099680   | -0.018900 |
| H | 1.380470  | -8.692550  | 2.415140  | C | 0.852860  | 5.832250   | 0.831010  |
| C | -1.858030 | -7.880430  | -1.795400 | C | -0.827780 | 5.829140   | -0.873010 |
| H | -2.235580 | -7.144130  | -2.510430 | C | 0.885060  | 7.227200   | 0.830590  |
| H | -2.725300 | -8.304470  | -1.277310 | H | 1.527000  | 5.296140   | 1.492980  |
| H | -1.402440 | -8.688470  | -2.376580 | C | -0.860300 | 7.224040   | -0.876900 |
| C | -0.684000 | -11.697870 | -2.084540 | H | -1.500960 | 5.290850   | -1.534230 |
| H | 0.254900  | -12.099830 | -1.692800 | C | 0.010950  | 7.970140   | -0.023130 |
| H | -0.434550 | -10.816700 | -2.686130 | C | 1.858030  | 7.880430   | 1.795400  |
| H | -1.106700 | -12.441710 | -2.765640 | C | -1.831820 | 7.874360   | -1.845210 |
| C | -2.190910 | -9.072020  | 2.081380  | B | 0.004290  | 9.536820   | -0.018870 |
| H | -2.331210 | -8.061480  | 1.683670  | H | 2.235580  | 7.144130   | 2.510430  |
| H | -1.196630 | -9.096920  | 2.535210  | H | 2.725300  | 8.304470   | 1.277310  |
| H | -2.920680 | -9.219460  | 2.882830  | H | 1.402440  | 8.688470   | 2.376580  |
| C | -5.847640 | -12.316930 | -1.282950 | H | -2.194490 | 7.139850   | -2.569800 |
| H | -6.781660 | -12.881240 | -1.276880 | H | -2.708900 | 8.283810   | -1.331640 |
| H | -5.229760 | -12.629170 | -2.122580 | H | -1.380470 | 8.692550   | -2.415140 |
| H | -6.047830 | -11.247090 | -1.345070 | C | 1.378660  | 10.364060  | -0.003130 |
| C | -6.038180 | -12.226610 | 1.150010  | C | -1.378570 | 10.350440  | -0.028950 |
| H | -6.302100 | -11.172090 | 1.078050  | C | 2.361580  | 10.116420  | -0.995470 |
| H | -5.547870 | -12.438520 | 2.099520  | C | 1.653640  | 11.362270  | 0.970400  |
| H | -6.935570 | -12.838090 | 1.054470  | C | -2.364710 | 10.078830  | 0.959870  |
| C | -4.814150 | -14.073680 | 0.126450  | C | -1.662420 | 11.352550  | -0.990380 |
| H | -5.759870 | -14.618010 | 0.116620  | C | 3.562170  | 10.846800  | -1.011310 |
| H | -4.283280 | -14.248430 | 1.062520  | C | 2.190910  | 9.072020   | -2.081380 |
| H | -4.198690 | -14.384780 | -0.715280 | C | 2.866920  | 12.059380  | 0.950500  |
| C | 2.181830  | -9.028370  | -2.037310 | C | 0.684000  | 11.697870  | 2.084540  |
| H | 2.286840  | -8.018510  | -1.627850 | C | -3.569120 | 10.792610  | 0.971540  |
| H | 1.195280  | -9.077420  | -2.506320 | C | -2.181830 | 9.028370   | 2.037310  |
| H | 2.927270  | -9.147640  | -2.828950 | C | -2.887520 | 12.039560  | -0.973300 |
| C | 0.693860  | -11.713490 | 2.098210  | C | -0.693860 | 11.713490  | -2.098210 |
| H | -0.232630 | -12.137610 | 1.700140  | C | 3.814220  | 11.804010  | -0.037900 |
| H | 0.419320  | -10.840300 | 2.700250  | H | 4.273690  | 10.628750  | -1.797140 |
| H | 1.130080  | -12.448370 | 2.780460  | H | 2.331210  | 8.061480   | -1.683670 |
| C | 6.294310  | -11.485180 | 0.090450  | H | 1.196630  | 9.096920   | -2.535210 |
| H | 6.250430  | -10.769470 | -0.728210 | H | 2.920680  | 9.219460   | -2.882830 |
| H | 7.240980  | -12.027250 | 0.061770  | H | 3.043050  | 12.800530  | 1.723260  |
| H | 6.178280  | -10.969120 | 1.043760  | H | -0.254900 | 12.099830  | 1.692800  |
| C | 5.314770  | -13.504440 | 1.052180  | H | 0.434550  | 10.816700  | 2.686130  |
| H | 4.534320  | -14.258830 | 0.958550  | H | 1.106700  | 12.441710  | 2.765640  |
| H | 5.253980  | -13.003200 | 2.017560  | C | -3.832210 | 11.759670  | 0.005000  |
| H | 6.293430  | -13.971760 | 0.941130  | H | -4.289970 | 10.562230  | 1.749380  |
| C | 5.299930  | -13.219560 | -1.372920 | H | -2.286840 | 8.018510   | 1.627850  |



|   |           |           |           |
|---|-----------|-----------|-----------|
| H | -1.195280 | 9.077420  | 2.506320  |
| H | -2.927270 | 9.147640  | 2.828950  |
| H | -3.060650 | 12.783690 | -1.739740 |
| H | 0.232630  | 12.137610 | -1.700140 |
| H | -0.419320 | 10.840300 | -2.700250 |
| H | -1.130080 | 12.448370 | -2.780460 |
| N | 5.109510  | 12.589700 | -0.014840 |
| N | -5.161420 | 12.484880 | 0.052530  |
| C | 5.847640  | 12.316930 | 1.282950  |
| C | 6.038180  | 12.226610 | -1.150010 |
| C | 4.814150  | 14.073680 | -0.126450 |
| C | -6.294310 | 11.485180 | -0.090450 |
| C | -5.314770 | 13.504440 | -1.052180 |
| C | -5.299930 | 13.219560 | 1.372920  |
| H | 6.781660  | 12.881240 | 1.276880  |
| H | 5.229760  | 12.629170 | 2.122580  |
| H | 6.047830  | 11.247090 | 1.345070  |
| H | 6.302100  | 11.172090 | -1.078050 |
| H | 5.547870  | 12.438520 | -2.099520 |
| H | 6.935570  | 12.838090 | -1.054470 |
| H | 5.759870  | 14.618010 | -0.116620 |
| H | 4.283280  | 14.248430 | -1.062520 |
| H | 4.198690  | 14.384780 | 0.715280  |
| H | -6.250430 | 10.769470 | 0.728210  |
| H | -7.240980 | 12.027250 | -0.061770 |
| H | -6.178280 | 10.969120 | -1.043760 |
| H | -4.534320 | 14.258830 | -0.958550 |
| H | -5.253980 | 13.003200 | -2.017560 |
| H | -6.293430 | 13.971760 | -0.941130 |
| H | -4.479570 | 13.932680 | 1.456610  |
| H | -6.259430 | 13.739240 | 1.382380  |
| H | -5.256470 | 12.504100 | 2.191690  |

|   |            |           |           |
|---|------------|-----------|-----------|
| C | -0.711158  | 0.028223  | 0.074262  |
| C | -3.544068  | 0.029632  | 0.072091  |
| C | -1.428988  | -1.201933 | 0.165920  |
| C | -1.427669  | 1.259263  | -0.016285 |
| C | -2.829003  | 1.234486  | -0.020568 |
| C | -2.830293  | -1.175708 | 0.168129  |
| H | -3.366914  | 2.177545  | -0.066484 |
| H | -3.369238  | -2.118237 | 0.212778  |
| C | -5.028577  | 0.028921  | 0.064443  |
| C | -7.898460  | 0.018338  | 0.036469  |
| C | -5.755122  | 0.932804  | -0.723525 |
| C | -5.763647  | -0.876834 | 0.842817  |
| C | -7.158633  | -0.911654 | 0.830991  |
| C | -7.150508  | 0.958408  | -0.738329 |
| H | -5.214599  | 1.620787  | -1.367300 |
| H | -5.230619  | -1.559636 | 1.498342  |
| C | 5.029944   | 0.022452  | 0.048764  |
| C | 7.900609   | 0.011830  | 0.018178  |
| C | 5.765518   | -0.883092 | 0.825916  |
| C | 5.755616   | 0.924987  | -0.741180 |
| C | 7.150351   | 0.925140  | -0.787089 |
| C | 7.161022   | -0.893216 | 0.842511  |
| H | 5.231987   | -1.584525 | 1.461077  |
| H | 5.213962   | 1.631217  | -1.364013 |
| C | -7.818377  | -1.936498 | 1.736242  |
| H | -8.235880  | -2.775692 | 1.168797  |
| H | -8.632316  | -1.513925 | 2.334232  |
| H | -7.087834  | -2.350290 | 2.437059  |
| C | -7.798260  | 1.985123  | -1.650075 |
| H | -8.598239  | 1.563316  | -2.266648 |
| H | -7.056099  | 2.408231  | -2.332863 |
| H | -8.231357  | 2.818024  | -1.084740 |
| C | 7.793911   | 1.955883  | -1.697361 |
| H | 8.225199   | 1.498469  | -2.594432 |
| H | 8.593933   | 2.518526  | -1.204870 |
| H | 7.049081   | 2.684029  | -2.030284 |
| C | 7.816397   | -1.925343 | 1.742577  |
| H | 8.596373   | -2.501218 | 1.233533  |
| H | 7.072180   | -2.641718 | 2.101359  |
| H | 8.277356   | -1.466548 | 2.624099  |
| B | -9.465222  | -0.000254 | 0.005681  |
| B | 9.466872   | -0.002371 | -0.007761 |
| C | -10.307806 | 1.362744  | 0.081664  |
| C | -11.780965 | 3.771292  | 0.261295  |
| C | -11.295323 | 1.691546  | -0.879896 |
| C | -10.079765 | 2.281999  | 1.143100  |
| C | -10.825517 | 3.463770  | 1.226482  |
| C | -12.014267 | 2.895027  | -0.790242 |
| H | -10.627772 | 4.132989  | 2.057392  |
| H | -12.744396 | 3.106765  | -1.560293 |
| C | -10.265966 | -1.385527 | -0.110064 |
| C | -11.662803 | -3.832553 | -0.368367 |
| C | -11.295782 | -1.741546 | 0.802379  |
| C | -9.962694  | -2.294830 | -1.156160 |
| C | -10.672015 | -3.501492 | -1.282539 |
| C | -11.972311 | -2.959489 | 0.671346  |
| H | -10.410846 | -4.155900 | -2.103800 |
| H | -12.740402 | -3.199700 | 1.399073  |

## Compound 2M

DFT B3LYP/6-31G\*, water, S<sub>0</sub>

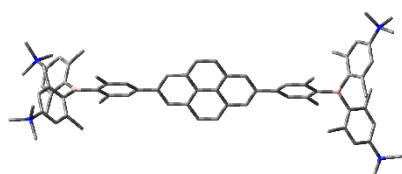

Point group: C<sub>1</sub>

Total energy: -2019094.10 kcal mol<sup>-1</sup>

Imaginary frequencies: 0

| Symbol | X        | Y         | Z         |
|--------|----------|-----------|-----------|
| C      | 0.712897 | 0.027240  | 0.071685  |
| C      | 3.545794 | 0.024793  | 0.059944  |
| C      | 1.429377 | -1.203978 | 0.160054  |
| C      | 1.430765 | 1.257366  | -0.020720 |
| C      | 2.832034 | 1.230939  | -0.029167 |
| C      | 2.830707 | -1.179938 | 0.156861  |
| H      | 3.370759 | 2.173550  | -0.074053 |
| H      | 3.368217 | -2.123456 | 0.196854  |

|   |            |           |           |   |            |           |           |
|---|------------|-----------|-----------|---|------------|-----------|-----------|
| C | 10.314223  | -0.124951 | 1.349287  | H | -12.580958 | -5.394715 | 1.653524  |
| C | 11.791241  | -0.298177 | 3.756880  | H | -11.144286 | -6.140741 | 0.902581  |
| C | 11.307711  | -1.118715 | 1.530382  | C | -11.992661 | -5.987473 | -1.636872 |
| C | 10.085383  | 0.788852  | 2.415407  | H | -12.592933 | -6.897469 | -1.628982 |
| C | 10.833316  | 0.699660  | 3.595506  | H | -10.938838 | -6.240769 | -1.526520 |
| C | 12.027072  | -1.206634 | 2.733609  | H | -12.163980 | -5.442134 | -2.564349 |
| H | 10.633727  | 1.422617  | 4.379797  | C | -11.567887 | 6.239790  | 0.339599  |
| H | 12.760232  | -1.997347 | 2.826506  | H | -11.033263 | 6.198794  | -0.609633 |
| C | 10.265106  | 0.102978  | -1.395598 | H | -10.865108 | 6.159238  | 1.166578  |
| C | 11.650421  | 0.240784  | -3.858991 | H | -12.133776 | 7.169404  | 0.420270  |
| C | 11.273298  | 1.079764  | -1.615573 | C | -13.549601 | 5.280731  | -0.716185 |
| C | 9.979876   | -0.804602 | -2.447660 | H | -14.281559 | 4.474260  | -0.690297 |
| C | 10.683421  | -0.735826 | -3.662179 | H | -13.034266 | 5.305150  | -1.675693 |
| C | 11.942812  | 1.146984  | -2.842570 | H | -14.046994 | 6.234971  | -0.541651 |
| H | 10.434948  | -1.458203 | -4.428926 | C | -13.296016 | 5.104364  | 1.705398  |
| H | 12.691620  | 1.921414  | -2.974121 | H | -13.987000 | 4.261297  | 1.722451  |
| C | -11.693218 | -0.855657 | 1.965163  | H | -13.842082 | 6.046763  | 1.772221  |
| H | -12.155982 | 0.074594  | 1.621484  | H | -12.590633 | 5.025091  | 2.530208  |
| H | -10.831481 | -0.580509 | 2.582495  | C | 13.323924  | 0.927997  | 5.272828  |
| H | -12.409097 | -1.361097 | 2.619365  | H | 14.014473  | 1.054143  | 4.438676  |
| C | -9.042550  | 2.047852  | 2.223330  | H | 13.871188  | 0.857890  | 6.214312  |
| H | -8.027638  | 2.139338  | 1.824461  | H | 12.626849  | 1.762855  | 5.309058  |
| H | -9.118286  | 1.049798  | 2.665394  | C | 11.583452  | -0.564165 | 6.213564  |
| H | -9.152508  | 2.773499  | 3.034356  | H | 11.038451  | -1.492882 | 6.042973  |
| C | -11.613305 | 0.794338  | -2.059150 | H | 10.889655  | 0.273309  | 6.252182  |
| H | -10.711537 | 0.494318  | -2.602458 | H | 12.152922  | -0.620039 | 7.142730  |
| H | -12.266746 | 1.300912  | -2.774968 | C | 13.549644  | -1.498151 | 5.108411  |
| H | -12.119013 | -0.122624 | -1.739778 | H | 14.283149  | -1.367270 | 4.313617  |
| C | -8.877511  | -2.039870 | -2.184322 | H | 13.022782  | -2.445128 | 4.996269  |
| H | -8.971570  | -2.728484 | -3.029043 | H | 14.048258  | -1.466794 | 6.077404  |
| H | -7.881933  | -2.176425 | -1.749756 | C | 13.892393  | 0.167456  | -4.917090 |
| H | -8.908074  | -1.023225 | -2.585599 | H | 14.417302  | 0.244423  | -5.870691 |
| C | 8.915855   | -1.879276 | -2.341068 | H | 14.045383  | -0.817754 | -4.476015 |
| H | 9.028347   | -2.621227 | -3.137050 | H | 14.243868  | 0.940076  | -4.236041 |
| H | 7.912256   | -1.449407 | -2.423706 | C | 11.984018  | -0.682636 | -6.181527 |
| H | 8.950957   | -2.413097 | -1.387621 | H | 12.573876  | -0.524675 | -7.084671 |
| C | 11.653260  | 2.102824  | -0.565367 | H | 10.925547  | -0.555995 | -6.406190 |
| H | 12.148237  | 1.632670  | 0.290091  | H | 12.178426  | -1.678443 | -5.784770 |
| H | 10.779029  | 2.637686  | -0.180283 | C | 12.165254  | 1.719292  | -5.782139 |
| H | 12.336248  | 2.853329  | -0.973177 | H | 12.711004  | 1.776151  | -6.725274 |
| C | 11.632008  | -2.147526 | 0.466310  | H | 12.518559  | 2.491001  | -5.101154 |
| H | 10.734613  | -2.654041 | 0.097057  | H | 11.094484  | 1.833930  | -5.951989 |
| H | 12.300644  | -2.920401 | 0.855614  | C | 0.680220   | -2.429952 | 0.242794  |
| H | 12.123343  | -1.687951 | -0.397217 | H | 1.227065   | -3.367227 | 0.305160  |
| C | 9.040253   | 1.884224  | 2.346032  | C | -0.681139  | -2.428864 | 0.245890  |
| H | 8.029737   | 1.471136  | 2.425977  | H | -1.228988  | -3.365383 | 0.310906  |
| H | 9.078655   | 2.440793  | 1.405300  | C | 0.682975   | 2.484538  | -0.098273 |
| H | 9.173278   | 2.604497  | 3.158530  | H | 1.230865   | 3.421129  | -0.161691 |
| N | -12.428265 | -5.136598 | -0.467012 | C | -0.678390  | 2.485339  | -0.096406 |
| N | -12.540926 | 5.076086  | 0.389474  | H | -1.225161  | 3.422680  | -0.158487 |
| N | 12.407394  | 0.353265  | -5.166315 |   |            |           |           |
| N | 12.553687  | -0.362708 | 5.064188  |   |            |           |           |
| C | -13.908882 | -4.852064 | -0.637631 |   |            |           |           |
| H | -14.439078 | -5.802975 | -0.711569 |   |            |           |           |
| H | -14.043294 | -4.268508 | -1.548645 |   |            |           |           |
| H | -14.270791 | -4.291313 | 0.221918  |   |            |           |           |
| C | -12.212602 | -5.952267 | 0.794579  |   |            |           |           |
| H | -12.759162 | -6.891924 | 0.698274  |   |            |           |           |

## Compound 2M

DFT B3LYP/6-31G\*, water, S<sub>0</sub>

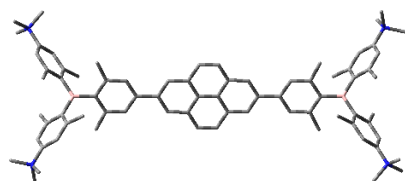

Point group: C<sub>i</sub>

Total energy: -2019170.38 kcal mol<sup>-1</sup>

| Symbol | X          | Y         | Z         |
|--------|------------|-----------|-----------|
| C      | 0.689110   | 0.025360  | -0.025090 |
| C      | 3.521930   | 0.009360  | -0.007430 |
| C      | 1.406530   | -0.870400 | -0.873610 |
| C      | 1.406000   | 0.914340  | 0.830980  |
| C      | 2.807230   | 0.885290  | 0.825720  |
| C      | 2.807830   | -0.857160 | -0.850830 |
| H      | 3.345310   | 1.583000  | 1.461660  |
| H      | 3.345950   | -1.561200 | -1.479710 |
| C      | -0.689110  | -0.025360 | 0.025090  |
| C      | -3.521930  | -0.009360 | 0.007430  |
| C      | -1.406000  | -0.914340 | -0.830980 |
| C      | -1.406530  | 0.870400  | 0.873610  |
| C      | -2.807830  | 0.857160  | 0.850830  |
| C      | -2.807230  | -0.885290 | -0.825720 |
| H      | -3.345950  | 1.561200  | 1.479710  |
| H      | -3.345310  | -1.583000 | -1.461660 |
| C      | -5.052350  | 0.035500  | -0.039010 |
| C      | -7.922330  | 0.021870  | -0.026080 |
| C      | -5.783560  | 0.895900  | 0.792140  |
| C      | -5.782780  | -0.828080 | -0.868040 |
| C      | -7.177780  | -0.864250 | -0.865090 |
| C      | -7.179020  | 0.919910  | 0.801260  |
| H      | -5.246820  | 1.549050  | 1.474220  |
| H      | -5.245930  | -1.474850 | -1.556170 |
| C      | -7.832160  | -1.839980 | -1.826750 |
| H      | -8.251800  | -2.708330 | -1.306740 |
| H      | -8.643440  | -1.386720 | -2.405570 |
| H      | -7.097780  | -2.215600 | -2.544850 |
| C      | -7.832160  | 1.896450  | 1.762920  |
| H      | -8.634860  | 1.442080  | 2.352210  |
| H      | -7.093760  | 2.283140  | 2.470920  |
| H      | -8.263110  | 2.757930  | 1.240400  |
| B      | -9.489210  | 0.000810  | -0.004210 |
| C      | -10.332510 | 1.365450  | -0.012000 |
| C      | -11.806720 | 3.779330  | -0.071000 |
| C      | -11.325090 | 1.642230  | 0.960670  |
| C      | -10.099920 | 2.339860  | -1.022010 |
| C      | -10.846220 | 3.523980  | -1.046330 |
| C      | -12.044560 | 2.848370  | 0.931380  |
| H      | -10.644870 | 4.236450  | -1.839550 |
| H      | -12.778700 | 3.018550  | 1.707890  |
| C      | -10.289390 | -1.389100 | 0.033850  |
| C      | -11.685500 | -3.847150 | 0.154920  |

|   |            |           |           |
|---|------------|-----------|-----------|
| C | -11.314340 | -1.696770 | -0.901370 |
| C | -9.990600  | -2.352460 | 1.031740  |
| C | -10.699560 | -3.564520 | 1.090350  |
| C | -11.990520 | -2.920320 | -0.838550 |
| H | -10.441960 | -4.261440 | 1.877030  |
| H | -12.754770 | -3.122000 | -1.581850 |
| C | -11.706690 | -0.750650 | -2.017500 |
| H | -12.171920 | 0.159800  | -1.627280 |
| H | -10.842100 | -0.442660 | -2.615020 |
| H | -12.418880 | -1.221060 | -2.701190 |
| C | -9.057130  | 2.163930  | -2.107910 |
| H | -8.044300  | 2.234680  | -1.699650 |
| H | -9.129850  | 1.190700  | -2.602680 |
| H | -9.163630  | 2.931530  | -2.879840 |
| C | -11.648220 | 0.683540  | 2.089040  |
| H | -10.748940 | 0.355610  | 2.620200  |
| H | -12.305650 | 1.151050  | 2.827430  |
| H | -12.151580 | -0.215470 | 1.718930  |
| C | -8.910780  | -2.151820 | 2.077430  |
| H | -9.008490  | -2.884330 | 2.883940  |
| H | -7.912930  | -2.264570 | 1.641240  |
| H | -8.944170  | -1.157910 | 2.531920  |
| N | -12.450380 | -5.155010 | 0.180390  |
| N | -12.567100 | 5.088670  | -0.133590 |
| C | -13.932060 | -4.880750 | 0.358410  |
| H | -14.461840 | -5.834540 | 0.379130  |
| H | -14.071500 | -4.346430 | 1.298420  |
| H | -14.290130 | -4.275380 | -0.471980 |
| C | -12.227750 | -5.902480 | -1.121600 |
| H | -12.774020 | -6.846220 | -1.078040 |
| H | -12.592260 | -5.300340 | -1.951600 |
| H | -11.158750 | -6.084370 | -1.234070 |
| C | -12.019930 | -6.066520 | 1.305630  |
| H | -12.619410 | -6.975150 | 1.246450  |
| H | -10.965360 | -6.313030 | 1.187300  |
| H | -12.196320 | -5.571260 | 2.259860  |
| C | -11.595270 | 6.248620  | -0.017150 |
| H | -11.065360 | 6.157610  | 0.931250  |
| H | -10.888310 | 6.212450  | -0.843690 |
| H | -12.161510 | 7.180890  | -0.051230 |
| C | -13.581450 | 5.233800  | 0.976280  |
| H | -14.312610 | 4.429440  | 0.903950  |
| H | -13.070940 | 5.207560  | 1.938310  |
| H | -14.078750 | 6.195680  | 0.850120  |
| C | -13.315630 | 5.186310  | -1.449950 |
| H | -14.005830 | 4.344960  | -1.515180 |
| H | -13.862130 | 6.130630  | -1.469420 |
| H | -12.606070 | 5.151300  | -2.274240 |
| C | 0.658310   | -1.762250 | -1.719690 |
| H | 1.205860   | -2.447270 | -2.361840 |
| C | -0.703020  | -1.756250 | -1.726270 |
| H | -1.250150  | -2.436440 | -2.373900 |
| C | 0.703020   | 1.756250  | 1.726270  |
| H | 1.250150   | 2.436440  | 2.373900  |
| C | -0.658310  | 1.762250  | 1.719690  |
| H | -1.205860  | 2.447270  | 2.361840  |
| C | 5.052350   | -0.035500 | 0.039010  |
| C | 5.783560   | -0.895900 | -0.792140 |

|   |           |           |           |
|---|-----------|-----------|-----------|
| C | 5.782780  | 0.828080  | 0.868040  |
| C | 7.179020  | -0.919910 | -0.801260 |
| H | 5.246820  | -1.549050 | -1.474220 |
| C | 7.177780  | 0.864250  | 0.865090  |
| H | 5.245930  | 1.474850  | 1.556170  |
| C | 7.922330  | -0.021870 | 0.026080  |
| C | 7.832160  | -1.896450 | -1.762920 |
| C | 7.832160  | 1.839980  | 1.826750  |
| B | 9.489210  | -0.000810 | 0.004210  |
| H | 8.634860  | -1.442080 | -2.352210 |
| H | 7.093760  | -2.283140 | -2.470920 |
| H | 8.263110  | -2.757930 | -1.240400 |
| H | 8.251800  | 2.708330  | 1.306740  |
| H | 8.643440  | 1.386720  | 2.405570  |
| H | 7.097780  | 2.215600  | 2.544850  |
| C | 10.332510 | -1.365450 | 0.012000  |
| C | 10.289390 | 1.389100  | -0.033850 |
| C | 11.325090 | -1.642230 | -0.960670 |
| C | 10.099920 | -2.339860 | 1.022010  |
| C | 11.314340 | 1.696770  | 0.901370  |
| C | 9.990600  | 2.352460  | -1.031740 |
| C | 12.044560 | -2.848370 | -0.931380 |
| C | 11.648220 | -0.683540 | -2.089040 |
| C | 10.846220 | -3.523980 | 1.046330  |
| C | 9.057130  | -2.163930 | 2.107910  |
| C | 11.990520 | 2.920320  | 0.838550  |
| C | 11.706690 | 0.750650  | 2.017500  |
| C | 10.699560 | 3.564520  | -1.090350 |
| C | 8.910780  | 2.151820  | -2.077430 |
| C | 11.806720 | -3.779330 | 0.071000  |
| H | 12.778700 | -3.018550 | -1.707890 |
| H | 10.748940 | -0.355610 | -2.620200 |
| H | 12.305650 | -1.151050 | -2.827430 |
| H | 12.151580 | 0.215470  | -1.718930 |
| H | 10.644870 | -4.236450 | 1.839550  |
| H | 8.044300  | -2.234680 | 1.699650  |
| H | 9.129850  | -1.190700 | 2.602680  |
| H | 9.163630  | -2.931530 | 2.879840  |
| C | 11.685500 | 3.847150  | -0.154920 |
| H | 12.754770 | 3.122000  | 1.581850  |
| H | 12.171920 | -0.159800 | 1.627280  |
| H | 10.842100 | 0.442660  | 2.615020  |
| H | 12.418880 | 1.221060  | 2.701190  |
| H | 10.441960 | 4.261440  | -1.877030 |
| H | 9.008490  | 2.884330  | -2.883940 |
| H | 7.912930  | 2.264570  | -1.641240 |
| H | 8.944170  | 1.157910  | -2.531920 |
| N | 12.567100 | -5.088670 | 0.133590  |
| N | 12.450380 | 5.155010  | -0.180390 |
| C | 11.595270 | -6.248620 | 0.017150  |
| C | 13.581450 | -5.233800 | -0.976280 |
| C | 13.315630 | -5.186310 | 1.449950  |
| C | 13.932060 | 4.880750  | -0.358410 |
| C | 12.227750 | 5.902480  | 1.121600  |
| C | 12.019930 | 6.066520  | -1.305630 |
| H | 11.065360 | -6.157610 | -0.931250 |
| H | 10.888310 | -6.212450 | 0.843690  |
| H | 12.161510 | -7.180890 | 0.051230  |

|   |           |           |           |
|---|-----------|-----------|-----------|
| H | 14.312610 | -4.429440 | -0.903950 |
| H | 13.070940 | -5.207560 | -1.938310 |
| H | 14.078750 | -6.195680 | -0.850120 |
| H | 14.005830 | -4.344960 | 1.515180  |
| H | 13.862130 | -6.130630 | 1.469420  |
| H | 12.606070 | -5.151300 | 2.274240  |
| H | 14.461840 | 5.834540  | -0.379130 |
| H | 14.071500 | 4.346430  | -1.298420 |
| H | 14.290130 | 4.275380  | 0.471980  |
| H | 12.774020 | 6.846220  | 1.078040  |
| H | 12.592260 | 5.300340  | 1.951600  |
| H | 11.158750 | 6.084370  | 1.234070  |
| H | 12.619410 | 6.975150  | -1.246450 |
| H | 10.965360 | 6.313030  | -1.187300 |
| H | 12.196320 | 5.571260  | -2.259860 |

### Compound 3M

DFT B3LYP/6-31G\*, water, S<sub>0</sub>

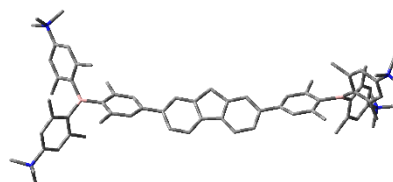

Point group: C<sub>1</sub>

Total energy: -1947382.60 kcal mol<sup>-1</sup>

Imaginary frequencies: 0

| Symbol | X         | Y         | Z         |
|--------|-----------|-----------|-----------|
| C      | -0.722957 | -1.395965 | -0.506400 |
| C      | -3.478062 | -0.881140 | -0.327342 |
| C      | -1.632553 | -2.392732 | -0.868008 |
| C      | -1.187115 | -0.143453 | -0.050765 |
| C      | -2.548027 | 0.113164  | 0.042941  |
| C      | -2.995565 | -2.127301 | -0.778429 |
| H      | -2.900854 | 1.088362  | 0.368570  |
| H      | -3.702625 | -2.910844 | -1.033028 |
| C      | 0.741409  | -1.382584 | -0.509275 |
| C      | 3.487756  | -0.817872 | -0.339974 |
| C      | 1.667591  | -2.362492 | -0.874593 |
| C      | 1.184666  | -0.121904 | -0.055414 |
| C      | 2.541108  | 0.159222  | 0.033428  |
| C      | 3.025744  | -2.072145 | -0.789702 |
| H      | 2.877151  | 1.140280  | 0.359253  |
| H      | 3.745847  | -2.842339 | -1.048487 |
| C      | 4.943213  | -0.547138 | -0.265133 |
| C      | 7.773937  | -0.081449 | -0.104046 |
| C      | 5.496418  | 0.261444  | 0.739124  |
| C      | 5.832900  | -1.100428 | -1.199052 |
| C      | 7.211597  | -0.904357 | -1.128702 |
| C      | 6.865991  | 0.517144  | 0.824784  |
| H      | 4.841140  | 0.679158  | 1.498134  |
| H      | 5.433501  | -1.685009 | -2.022601 |
| C      | -4.937327 | -0.634548 | -0.248932 |
| C      | -7.773337 | -0.203778 | -0.088426 |

|   |            |           |           |   |            |           |           |
|---|------------|-----------|-----------|---|------------|-----------|-----------|
| C | -5.818345  | -1.189981 | -1.188934 | H | 10.824713  | 0.357813  | -2.580073 |
| C | -5.501543  | 0.153481  | 0.765239  | H | 12.515438  | -0.126053 | -2.660567 |
| C | -6.877538  | 0.358774  | 0.874115  | C | 8.631592   | 2.549334  | -1.706410 |
| C | -7.196255  | -0.978426 | -1.143051 | H | 7.606292   | 2.405060  | -1.352062 |
| H | -5.412228  | -1.786359 | -2.000768 | H | 8.864421   | 1.696368  | -2.350850 |
| H | -4.849157  | 0.593656  | 1.514379  | H | 8.648405   | 3.446177  | -2.332530 |
| C | 8.042279   | -1.560709 | -2.217180 | C | 11.276879  | 0.731923  | 2.318306  |
| H | 8.569021   | -2.449565 | -1.851755 | H | 10.421606  | 0.179504  | 2.719718  |
| H | 8.795866   | -0.889586 | -2.641450 | H | 11.819057  | 1.150574  | 3.170891  |
| H | 7.399809   | -1.882450 | -3.041738 | H | 11.934568  | 0.003067  | 1.833451  |
| C | 7.320847   | 1.397519  | 1.974912  | C | 9.019219   | -2.424353 | 1.644062  |
| H | 8.153114   | 0.963905  | 2.539061  | H | 9.213044   | -3.260303 | 2.322521  |
| H | 6.501263   | 1.553575  | 2.681928  | H | 8.064584   | -2.614439 | 1.142742  |
| H | 7.645469   | 2.385567  | 1.629999  | H | 8.879005   | -1.530071 | 2.256964  |
| C | -7.342633  | 1.225024  | 2.031188  | C | -9.001468  | -2.469983 | 1.778789  |
| H | -7.834540  | 0.636677  | 2.813458  | H | -9.218175  | -3.372304 | 2.358073  |
| H | -8.047427  | 2.003962  | 1.721325  | H | -7.947128  | -2.218194 | 1.934544  |
| H | -6.489934  | 1.730454  | 2.493204  | H | -9.109610  | -2.724552 | 0.721318  |
| C | -8.015669  | -1.643059 | -2.235139 | C | -11.175260 | 2.162775  | 1.200144  |
| H | -8.871130  | -2.203968 | -1.844338 | H | -11.725454 | 1.999206  | 0.268302  |
| H | -7.397453  | -2.350758 | -2.794371 | H | -10.237720 | 2.664843  | 0.939161  |
| H | -8.407961  | -0.915808 | -2.954318 | H | -11.755417 | 2.860262  | 1.810822  |
| B | 9.321466   | 0.131439  | 0.009795  | C | -11.796658 | -1.627543 | -0.852536 |
| B | -9.322178  | -0.002008 | 0.018015  | H | -10.980315 | -2.328897 | -0.653270 |
| C | 9.943329   | 1.582676  | 0.292536  | H | -12.572433 | -2.180922 | -1.389170 |
| C | 11.044205  | 4.152131  | 0.730092  | H | -12.211755 | -1.330098 | 0.115842  |
| C | 10.850341  | 1.820587  | 1.354408  | C | -8.653749  | 2.335363  | -1.816113 |
| C | 9.600121   | 2.678218  | -0.547758 | H | -7.715475  | 1.817269  | -2.038424 |
| C | 10.162480  | 3.941117  | -0.327231 | H | -8.602264  | 2.643587  | -0.767865 |
| C | 11.383766  | 3.101618  | 1.572203  | H | -8.687091  | 3.244639  | -2.423411 |
| H | 9.882446   | 4.746459  | -0.998640 | N | 13.002822  | -4.505463 | -0.577393 |
| H | 12.059548  | 3.231889  | 2.407626  | N | 11.607628  | 5.543710  | 0.933982  |
| C | 10.325378  | -1.109661 | -0.152222 | N | -12.136466 | -0.611238 | 5.222859  |
| C | 12.061182  | -3.331211 | -0.402701 | N | -12.484765 | 1.343709  | -4.836276 |
| C | 11.412128  | -1.091973 | -1.068162 | C | 14.427668  | -4.070323 | -0.290069 |
| C | 10.144349  | -2.273792 | 0.638424  | H | 15.085264  | -4.932717 | -0.411061 |
| C | 11.020180  | -3.365976 | 0.514687  | H | 14.472305  | -3.697069 | 0.733264  |
| C | 12.256293  | -2.201008 | -1.192558 | H | 14.714327  | -3.285315 | -0.986991 |
| H | 10.844936  | -4.225940 | 1.147763  | C | 12.909865  | -5.025875 | -2.000050 |
| H | 13.061259  | -2.152197 | -1.918487 | H | 13.583209  | -5.878486 | -2.102719 |
| C | -10.199823 | 0.341448  | -1.279982 | H | 13.198740  | -4.238082 | -2.693061 |
| C | -11.711690 | 0.979288  | -3.585660 | H | 11.879320  | -5.327927 | -2.187752 |
| C | -11.333069 | -0.424776 | -1.649184 | C | 12.685954  | -5.656530 | 0.348382  |
| C | -9.849427  | 1.448698  | -2.101631 | H | 13.409927  | -6.448382 | 0.155224  |
| C | -10.613895 | 1.760180  | -3.232371 | H | 11.679887  | -6.019923 | 0.141952  |
| C | -12.070490 | -0.109561 | -2.802378 | H | 12.772108  | -5.323334 | 1.382085  |
| H | -10.316212 | 2.617920  | -3.826806 | C | 10.474851  | 6.520872  | 1.188592  |
| H | -12.914838 | -0.739911 | -3.049358 | H | 9.934174   | 6.194982  | 2.077487  |
| C | -10.073278 | -0.149629 | 1.427619  | H | 9.807047   | 6.530909  | 0.329417  |
| C | -11.405768 | -0.475316 | 3.902463  | H | 10.900384  | 7.513925  | 1.342425  |
| C | -10.933049 | 0.861214  | 1.935916  | C | 12.553181  | 5.628216  | 2.109230  |
| C | -9.904597  | -1.327094 | 2.200343  | H | 13.395609  | 4.957895  | 1.942585  |
| C | -10.582286 | -1.484015 | 3.421614  | H | 12.020896  | 5.360878  | 3.021329  |
| C | -11.577264 | 0.694845  | 3.166885  | H | 12.908541  | 6.656542  | 2.178219  |
| H | -10.430120 | -2.406458 | 3.966773  | C | 12.377621  | 5.972812  | -0.301034 |
| H | -12.212142 | 1.498643  | 3.524893  | H | 13.185273  | 5.259488  | -0.466371 |
| C | 11.695218  | 0.091340  | -1.970721 | H | 12.780212  | 6.972418  | -0.129385 |
| H | 11.971109  | 0.978997  | -1.393809 | H | 11.708566  | 5.984007  | -1.159031 |

|   |            |           |           |
|---|------------|-----------|-----------|
| C | -13.038649 | 2.750472  | -4.707518 |
| H | -13.692551 | 2.783755  | -3.835832 |
| H | -13.598162 | 2.987515  | -5.613868 |
| H | -12.216787 | 3.452907  | -4.584093 |
| C | -11.566622 | 1.270353  | -6.042642 |
| H | -11.178627 | 0.254210  | -6.116443 |
| H | -10.746417 | 1.973928  | -5.914719 |
| H | -12.142460 | 1.525798  | -6.933717 |
| C | -13.651298 | 0.419191  | -5.097172 |
| H | -14.346059 | 0.468745  | -4.259404 |
| H | -13.283800 | -0.597148 | -5.234875 |
| H | -14.147404 | 0.757262  | -6.007134 |
| C | -13.633418 | -0.523662 | 4.991934  |
| H | -14.140083 | -0.627490 | 5.952813  |
| H | -13.924181 | -1.329982 | 4.318258  |
| H | -13.874844 | 0.439747  | 4.547218  |
| C | -11.861148 | -1.925699 | 5.915292  |
| H | -12.425789 | -1.935333 | 6.847766  |
| H | -10.795852 | -2.005221 | 6.129171  |
| H | -12.189597 | -2.745900 | 5.277860  |
| C | -11.704435 | 0.498002  | 6.164230  |
| H | -12.231100 | 0.373835  | 7.111894  |
| H | -11.952147 | 1.462586  | 5.725502  |
| H | -10.627130 | 0.421287  | 6.312634  |
| H | -1.291165  | -3.365967 | -1.209314 |
| H | 1.342594   | -3.341532 | -1.215312 |
| C | -0.008715  | 0.759996  | 0.264546  |
| H | -0.009669  | 1.085901  | 1.313694  |
| H | -0.018343  | 1.674269  | -0.344474 |

## Compound 4M

DFT B3LYP/6-31G\*, water, S<sub>0</sub>

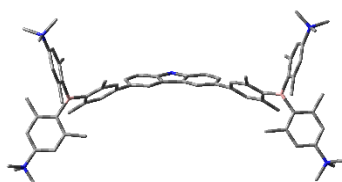

Point group: C<sub>1</sub>

Total energy: -1957452.61 kcal mol<sup>-1</sup>

Imaginary frequencies: 0

| Symbol | X         | Y         | Z         |
|--------|-----------|-----------|-----------|
| C      | -0.722957 | -1.395965 | -0.506400 |
| C      | -3.478062 | -0.881140 | -0.327342 |
| C      | -1.632553 | -2.392732 | -0.868008 |
| C      | -1.187115 | -0.143453 | -0.050765 |
| C      | -2.548027 | 0.113164  | 0.042941  |
| C      | -2.995565 | -2.127301 | -0.778429 |
| H      | -2.900854 | 1.088362  | 0.368570  |
| H      | -3.702625 | -2.910844 | -1.033028 |
| C      | 0.741409  | -1.382584 | -0.509275 |
| C      | 3.487756  | -0.817872 | -0.339974 |
| C      | 1.667591  | -2.362492 | -0.874593 |

|   |            |           |           |
|---|------------|-----------|-----------|
| C | 1.184666   | -0.121904 | -0.055414 |
| C | 2.541108   | 0.159222  | 0.033428  |
| C | 3.025744   | -2.072145 | -0.789702 |
| H | 2.877151   | 1.140280  | 0.359253  |
| H | 3.745847   | -2.842339 | -1.048487 |
| C | 4.943213   | -0.547138 | -0.265133 |
| C | 7.773937   | -0.081449 | -0.104046 |
| C | 5.496418   | 0.261444  | 0.739124  |
| C | 5.832900   | -1.100428 | -1.199052 |
| C | 7.211597   | -0.904357 | -1.128702 |
| C | 6.865991   | 0.517144  | 0.824784  |
| H | 4.841140   | 0.679158  | 1.498134  |
| H | 5.433501   | -1.685009 | -2.022601 |
| C | -4.937327  | -0.634548 | -0.248932 |
| C | -7.773337  | -0.203778 | -0.088426 |
| C | -5.818345  | -1.189981 | -1.188934 |
| C | -5.501543  | 0.153481  | 0.765239  |
| C | -6.877538  | 0.358774  | 0.874115  |
| C | -7.196255  | -0.978426 | -1.143051 |
| H | -5.412228  | -1.786359 | -2.000768 |
| H | -4.849157  | 0.593656  | 1.514379  |
| C | 8.042279   | -1.560709 | -2.217180 |
| H | 8.569021   | -2.449565 | -1.851755 |
| H | 8.795866   | -0.889586 | -2.641450 |
| H | 7.399809   | -1.882450 | -3.041738 |
| C | 7.320847   | 1.397519  | 1.974912  |
| H | 8.153114   | 0.963905  | 2.539061  |
| H | 6.501263   | 1.553575  | 2.681928  |
| H | 7.645469   | 2.385567  | 1.629999  |
| C | -7.342633  | 1.225024  | 2.031188  |
| H | -7.834540  | 0.636677  | 2.813458  |
| H | -8.047427  | 2.003962  | 1.721325  |
| H | -6.489934  | 1.730454  | 2.493204  |
| C | -8.015669  | -1.643059 | -2.235139 |
| H | -8.871130  | -2.203968 | -1.844338 |
| H | -7.397453  | -2.350758 | -2.794371 |
| H | -8.407961  | -0.915808 | -2.954318 |
| B | 9.321466   | 0.131439  | 0.009795  |
| B | -9.322178  | -0.002008 | 0.018015  |
| C | 9.943329   | 1.582676  | 0.292536  |
| C | 11.044205  | 4.152131  | 0.730092  |
| C | 10.850341  | 1.820587  | 1.354408  |
| C | 9.600121   | 2.678218  | -0.547758 |
| C | 10.162480  | 3.941117  | -0.327231 |
| C | 11.383766  | 3.101618  | 1.572203  |
| H | 9.882446   | 4.746459  | -0.998640 |
| H | 12.059548  | 3.231889  | 2.407626  |
| C | 10.325378  | -1.109661 | -0.152222 |
| C | 12.061182  | -3.331211 | -0.402701 |
| C | 11.412128  | -1.091973 | -1.068162 |
| C | 10.144349  | -2.273792 | 0.638424  |
| C | 11.020180  | -3.365976 | 0.514687  |
| C | 12.256293  | -2.201008 | -1.192558 |
| H | 10.844936  | -4.225940 | 1.147763  |
| H | 13.061259  | -2.152197 | -1.918487 |
| C | -10.199823 | 0.341448  | -1.279982 |
| C | -11.711690 | 0.979288  | -3.585660 |
| C | -11.333069 | -0.424776 | -1.649184 |

|   |            |           |           |   |            |           |           |
|---|------------|-----------|-----------|---|------------|-----------|-----------|
| C | -9.849427  | 1.448698  | -2.101631 | H | 13.409927  | -6.448382 | 0.155224  |
| C | -10.613895 | 1.760180  | -3.232371 | H | 11.679887  | -6.019923 | 0.141952  |
| C | -12.070490 | -0.109561 | -2.802378 | H | 12.772108  | -5.323334 | 1.382085  |
| H | -10.316212 | 2.617920  | -3.826806 | C | 10.474851  | 6.520872  | 1.188592  |
| H | -12.914838 | -0.739911 | -3.049358 | H | 9.934174   | 6.194982  | 2.077487  |
| C | -10.073278 | -0.149629 | 1.427619  | H | 9.807047   | 6.530909  | 0.329417  |
| C | -11.405768 | -0.475316 | 3.902463  | H | 10.900384  | 7.513925  | 1.342425  |
| C | -10.933049 | 0.861214  | 1.935916  | C | 12.553181  | 5.628216  | 2.109230  |
| C | -9.904597  | -1.327094 | 2.200343  | H | 13.395609  | 4.957895  | 1.942585  |
| C | -10.582286 | -1.484015 | 3.421614  | H | 12.020896  | 5.360878  | 3.021329  |
| C | -11.577264 | 0.694845  | 3.166885  | H | 12.908541  | 6.656542  | 2.178219  |
| H | -10.430120 | -2.406458 | 3.966773  | C | 12.377621  | 5.972812  | -0.301034 |
| H | -12.212142 | 1.498643  | 3.524893  | H | 13.185273  | 5.259488  | -0.466371 |
| C | 11.695218  | 0.091340  | -1.970721 | H | 12.780212  | 6.972418  | -0.129385 |
| H | 11.971109  | 0.978997  | -1.393809 | H | 11.708566  | 5.984007  | -1.159031 |
| H | 10.824713  | 0.357813  | -2.580073 | C | -13.038649 | 2.750472  | -4.707518 |
| H | 12.515438  | -0.126053 | -2.660567 | H | -13.692551 | 2.783755  | -3.835832 |
| C | 8.631592   | 2.549334  | -1.706410 | H | -13.598162 | 2.987515  | -5.613868 |
| H | 7.606292   | 2.405060  | -1.352062 | H | -12.216787 | 3.452907  | -4.584093 |
| H | 8.864421   | 1.696368  | -2.350850 | C | -11.566622 | 1.270353  | -6.042642 |
| H | 8.648405   | 3.446177  | -2.332530 | H | -11.178627 | 0.254210  | -6.116443 |
| C | 11.276879  | 0.731923  | 2.318306  | H | -10.746417 | 1.973928  | -5.914719 |
| H | 10.421606  | 0.179504  | 2.719718  | H | -12.142460 | 1.525798  | -6.933717 |
| H | 11.819057  | 1.150574  | 3.170891  | C | -13.651298 | 0.419191  | -5.097172 |
| H | 11.934568  | 0.003067  | 1.833451  | H | -14.346059 | 0.468745  | -4.259404 |
| C | 9.019219   | -2.424353 | 1.644062  | H | -13.283800 | -0.597148 | -5.234875 |
| H | 9.213044   | -3.260303 | 2.322521  | H | -14.147404 | 0.757262  | -6.007134 |
| H | 8.064584   | -2.614439 | 1.142742  | C | -13.633418 | -0.523662 | 4.991934  |
| H | 8.879005   | -1.530071 | 2.256964  | H | -14.140083 | -0.627490 | 5.952813  |
| C | -9.001468  | -2.469983 | 1.778789  | H | -13.924181 | -1.329982 | 4.318258  |
| H | -9.218175  | -3.372304 | 2.358073  | H | -13.874844 | 0.439747  | 4.547218  |
| H | -7.947128  | -2.218194 | 1.934544  | C | -11.861148 | -1.925699 | 5.915292  |
| H | -9.109610  | -2.724552 | 0.721318  | H | -12.425789 | -1.935333 | 6.847766  |
| C | -11.175260 | 2.162775  | 1.200144  | H | -10.795852 | -2.005221 | 6.129171  |
| H | -11.725454 | 1.999206  | 0.268302  | H | -12.189597 | -2.745900 | 5.277860  |
| H | -10.237720 | 2.664843  | 0.939161  | C | -11.704435 | 0.498002  | 6.164230  |
| H | -11.755417 | 2.860262  | 1.810822  | H | -12.231100 | 0.373835  | 7.111894  |
| C | -11.796658 | -1.627543 | -0.852536 | H | -11.952147 | 1.462586  | 5.725502  |
| H | -10.980315 | -2.328897 | -0.653270 | H | -10.627130 | 0.421287  | 6.312634  |
| H | -12.572433 | -2.180922 | -1.389170 | H | -1.291165  | -3.365967 | -1.209314 |
| H | -12.211755 | -1.330098 | 0.115842  | H | 1.342594   | -3.341532 | -1.215312 |
| C | -8.653749  | 2.335363  | -1.816113 | C | -0.008715  | 0.759996  | 0.264546  |
| H | -7.715475  | 1.817269  | -2.038424 | H | -0.009669  | 1.085901  | 1.313694  |
| H | -8.602264  | 2.643587  | -0.767865 | H | -0.018343  | 1.674269  | -0.344474 |
| H | -8.687091  | 3.244639  | -2.423411 |   |            |           |           |
| N | 13.002822  | -4.505463 | -0.577393 |   |            |           |           |
| N | 11.607628  | 5.543710  | 0.933982  |   |            |           |           |
| N | -12.136466 | -0.611238 | 5.222859  |   |            |           |           |
| N | -12.484765 | 1.343709  | -4.836276 |   |            |           |           |
| C | 14.427668  | -4.070323 | -0.290069 |   |            |           |           |
| H | 15.085264  | -4.932717 | -0.411061 |   |            |           |           |
| H | 14.472305  | -3.697069 | 0.733264  |   |            |           |           |
| H | 14.714327  | -3.285315 | -0.986991 |   |            |           |           |
| C | 12.909865  | -5.025875 | -2.000050 |   |            |           |           |
| H | 13.583209  | -5.878486 | -2.102719 |   |            |           |           |
| H | 13.198740  | -4.238082 | -2.693061 |   |            |           |           |
| H | 11.879320  | -5.327927 | -2.187752 |   |            |           |           |
| C | 12.685954  | -5.656530 | 0.348382  |   |            |           |           |

## Compound 5M

DFT B3LYP/6-31G\*, water, S<sub>0</sub>

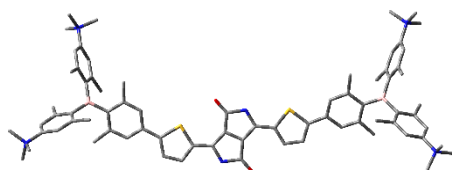

Point group: C<sub>1</sub>

Total energy: - 2633343.06 kcal mol<sup>-1</sup>

Imaginary frequencies: 0

| Symbol | X         | Y         | Z         |
|--------|-----------|-----------|-----------|
| C      | -0.722957 | -1.395965 | -0.506400 |
| C      | -3.478062 | -0.881140 | -0.327342 |
| C      | -1.632553 | -2.392732 | -0.868008 |
| C      | -1.187115 | -0.143453 | -0.050765 |
| C      | -2.548027 | 0.113164  | 0.042941  |
| C      | -2.995565 | -2.127301 | -0.778429 |
| H      | -2.900854 | 1.088362  | 0.368570  |
| H      | -3.702625 | -2.910844 | -1.033028 |
| C      | 0.741409  | -1.382584 | -0.509275 |
| C      | 3.487756  | -0.817872 | -0.339974 |
| C      | 1.667591  | -2.362492 | -0.874593 |
| C      | 1.184666  | -0.121904 | -0.055414 |
| C      | 2.541108  | 0.159222  | 0.033428  |
| C      | 3.025744  | -2.072145 | -0.789702 |
| H      | 2.877151  | 1.140280  | 0.359253  |
| H      | 3.745847  | -2.842339 | -1.048487 |
| C      | 4.943213  | -0.547138 | -0.265133 |
| C      | 7.773937  | -0.081449 | -0.104046 |
| C      | 5.496418  | 0.261444  | 0.739124  |
| C      | 5.832900  | -1.100428 | -1.199052 |
| C      | 7.211597  | -0.904357 | -1.128702 |
| C      | 6.865991  | 0.517144  | 0.824784  |
| H      | 4.841140  | 0.679158  | 1.498134  |
| H      | 5.433501  | -1.685009 | -2.022601 |
| C      | -4.937327 | -0.634548 | -0.248932 |
| C      | -7.773337 | -0.203778 | -0.088426 |
| C      | -5.818345 | -1.189981 | -1.188934 |
| C      | -5.501543 | 0.153481  | 0.765239  |
| C      | -6.877538 | 0.358774  | 0.874115  |
| C      | -7.196255 | -0.978426 | -1.143051 |
| H      | -5.412228 | -1.786359 | -2.000768 |
| H      | -4.849157 | 0.593656  | 1.514379  |
| C      | 8.042279  | -1.560709 | -2.217180 |
| H      | 8.569021  | -2.449565 | -1.851755 |
| H      | 8.795866  | -0.889586 | -2.641450 |
| H      | 7.399809  | -1.882450 | -3.041738 |
| C      | 7.320847  | 1.397519  | 1.974912  |
| H      | 8.153114  | 0.963905  | 2.539061  |
| H      | 6.501263  | 1.553575  | 2.681928  |
| H      | 7.645469  | 2.385567  | 1.629999  |
| C      | -7.342633 | 1.225024  | 2.031188  |

|   |            |           |           |
|---|------------|-----------|-----------|
| H | -7.834540  | 0.636677  | 2.813458  |
| H | -8.047427  | 2.003962  | 1.721325  |
| H | -6.489934  | 1.730454  | 2.493204  |
| C | -8.015669  | -1.643059 | -2.235139 |
| H | -8.871130  | -2.203968 | -1.844338 |
| H | -7.397453  | -2.350758 | -2.794371 |
| H | -8.407961  | -0.915808 | -2.954318 |
| B | 9.321466   | 0.131439  | 0.009795  |
| B | -9.322178  | -0.002008 | 0.018015  |
| C | 9.943329   | 1.582676  | 0.292536  |
| C | 11.044205  | 4.152131  | 0.730092  |
| C | 10.850341  | 1.820587  | 1.354408  |
| C | 9.600121   | 2.678218  | -0.547758 |
| C | 10.162480  | 3.941117  | -0.327231 |
| C | 11.383766  | 3.101618  | 1.572203  |
| H | 9.882446   | 4.746459  | -0.998640 |
| H | 12.059548  | 3.231889  | 2.407626  |
| C | 10.325378  | -1.109661 | -0.152222 |
| C | 12.061182  | -3.331211 | -0.402701 |
| C | 11.412128  | -1.091973 | -1.068162 |
| C | 10.144349  | -2.273792 | 0.638424  |
| C | 11.020180  | -3.365976 | 0.514687  |
| C | 12.256293  | -2.201008 | -1.192558 |
| H | 10.844936  | -4.225940 | 1.147763  |
| H | 13.061259  | -2.152197 | -1.918487 |
| C | -10.199823 | 0.341448  | -1.279982 |
| C | -11.711690 | 0.979288  | -3.585660 |
| C | -11.333069 | -0.424776 | -1.649184 |
| C | -9.849427  | 1.448698  | -2.101631 |
| C | -10.613895 | 1.760180  | -3.232371 |
| C | -12.070490 | -0.109561 | -2.802378 |
| H | -10.316212 | 2.617920  | -3.826806 |
| H | -12.914838 | -0.739911 | -3.049358 |
| C | -10.073278 | -0.149629 | 1.427619  |
| C | -11.405768 | -0.475316 | 3.902463  |
| C | -10.933049 | 0.861214  | 1.935916  |
| C | -9.904597  | -1.327094 | 2.200343  |
| C | -10.582286 | -1.484015 | 3.421614  |
| C | -11.577264 | 0.694845  | 3.166885  |
| H | -10.430120 | -2.406458 | 3.966773  |
| H | -12.212142 | 1.498643  | 3.524893  |
| C | 11.695218  | 0.091340  | -1.970721 |
| H | 11.971109  | 0.978997  | -1.393809 |
| H | 10.824713  | 0.357813  | -2.580073 |
| H | 12.515438  | -0.126053 | -2.660567 |
| C | 8.631592   | 2.549334  | -1.706410 |
| H | 7.606292   | 2.405060  | -1.352062 |
| H | 8.864421   | 1.696368  | -2.350850 |
| H | 8.648405   | 3.446177  | -2.332530 |
| C | 11.276879  | 0.731923  | 2.318306  |
| H | 10.421606  | 0.179504  | 2.719718  |
| H | 11.819057  | 1.150574  | 3.170891  |
| H | 11.934568  | 0.003067  | 1.833451  |
| C | 9.019219   | -2.424353 | 1.644062  |
| H | 9.213044   | -3.260303 | 2.322521  |
| H | 8.064584   | -2.614439 | 1.142742  |
| H | 8.879005   | -1.530071 | 2.256964  |
| C | -9.001468  | -2.469983 | 1.778789  |



|   |            |           |           |
|---|------------|-----------|-----------|
| H | -9.218175  | -3.372304 | 2.358073  |
| H | -7.947128  | -2.218194 | 1.934544  |
| H | -9.109610  | -2.724552 | 0.721318  |
| C | -11.175260 | 2.162775  | 1.200144  |
| H | -11.725454 | 1.999206  | 0.268302  |
| H | -10.237720 | 2.664843  | 0.939161  |
| H | -11.755417 | 2.860262  | 1.810822  |
| C | -11.796658 | -1.627543 | -0.852536 |
| H | -10.980315 | -2.328897 | -0.653270 |
| H | -12.572433 | -2.180922 | -1.389170 |
| H | -12.211755 | -1.330098 | 0.115842  |
| C | -8.653749  | 2.335363  | -1.816113 |
| H | -7.715475  | 1.817269  | -2.038424 |
| H | -8.602264  | 2.643587  | -0.767865 |
| H | -8.687091  | 3.244639  | -2.423411 |
| N | 13.002822  | -4.505463 | -0.577393 |
| N | 11.607628  | 5.543710  | 0.933982  |
| N | -12.136466 | -0.611238 | 5.222859  |
| N | -12.484765 | 1.343709  | -4.836276 |
| C | 14.427668  | -4.070323 | -0.290069 |
| H | 15.085264  | -4.932717 | -0.411061 |
| H | 14.472305  | -3.697069 | 0.733264  |
| H | 14.714327  | -3.285315 | -0.986991 |
| C | 12.909865  | -5.025875 | -2.000050 |
| H | 13.583209  | -5.878486 | -2.102719 |
| H | 13.198740  | -4.238082 | -2.693061 |
| H | 11.879320  | -5.327927 | -2.187752 |
| C | 12.685954  | -5.656530 | 0.348382  |
| H | 13.409927  | -6.448382 | 0.155224  |
| H | 11.679887  | -6.019923 | 0.141952  |
| H | 12.772108  | -5.323334 | 1.382085  |
| C | 10.474851  | 6.520872  | 1.188592  |
| H | 9.934174   | 6.194982  | 2.077487  |
| H | 9.807047   | 6.530909  | 0.329417  |
| H | 10.900384  | 7.513925  | 1.342425  |
| C | 12.553181  | 5.628216  | 2.109230  |
| H | 13.395609  | 4.957895  | 1.942585  |
| H | 12.020896  | 5.360878  | 3.021329  |
| H | 12.908541  | 6.656542  | 2.178219  |
| C | 12.377621  | 5.972812  | -0.301034 |
| H | 13.185273  | 5.259488  | -0.466371 |
| H | 12.780212  | 6.972418  | -0.129385 |
| H | 11.708566  | 5.984007  | -1.159031 |
| C | -13.038649 | 2.750472  | -4.707518 |
| H | -13.692551 | 2.783755  | -3.835832 |
| H | -13.598162 | 2.987515  | -5.613868 |
| H | -12.216787 | 3.452907  | -4.584093 |
| C | -11.566622 | 1.270353  | -6.042642 |
| H | -11.178627 | 0.254210  | -6.116443 |
| H | -10.746417 | 1.973928  | -5.914719 |
| H | -12.142460 | 1.525798  | -6.933717 |
| C | -13.651298 | 0.419191  | -5.097172 |
| H | -14.346059 | 0.468745  | -4.259404 |
| H | -13.283800 | -0.597148 | -5.234875 |
| H | -14.147404 | 0.757262  | -6.007134 |
| C | -13.633418 | -0.523662 | 4.991934  |
| H | -14.140083 | -0.627490 | 5.952813  |
| H | -13.924181 | -1.329982 | 4.318258  |

|   |            |           |           |
|---|------------|-----------|-----------|
| H | -13.874844 | 0.439747  | 4.547218  |
| C | -11.861148 | -1.925699 | 5.915292  |
| H | -12.425789 | -1.935333 | 6.847766  |
| H | -10.795852 | -2.005221 | 6.129171  |
| H | -12.189597 | -2.745900 | 5.277860  |
| C | -11.704435 | 0.498002  | 6.164230  |
| H | -12.231100 | 0.373835  | 7.111894  |
| H | -11.952147 | 1.462586  | 5.725502  |
| H | -10.627130 | 0.421287  | 6.312634  |
| H | -1.291165  | -3.365967 | -1.209314 |
| H | 1.342594   | -3.341532 | -1.215312 |
| C | -0.008715  | 0.759996  | 0.264546  |
| H | -0.009669  | 1.085901  | 1.313694  |
| H | -0.018343  | 1.674269  | -0.344474 |

### Compound 5M

DFT B3LYP/6-31G\*, water, S<sub>0</sub>

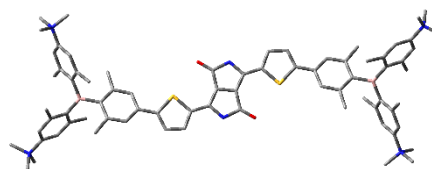

Point group: C<sub>i</sub>

Total energy: -2633397.46 kcal mol<sup>-1</sup>

| Symbol | X         | Y         | Z         |
|--------|-----------|-----------|-----------|
| C      | 1.332320  | 0.994310  | -0.567460 |
| N      | 0.314620  | 1.831600  | -1.017960 |
| H      | 0.450370  | 2.703510  | -1.510550 |
| C      | -0.980160 | 1.338470  | -0.729070 |
| O      | -2.020840 | 1.916790  | -1.036130 |
| C      | -0.706900 | 0.088170  | -0.039640 |
| C      | 0.706900  | -0.088170 | 0.039640  |
| C      | -1.332320 | -0.994310 | 0.567460  |
| N      | -0.314620 | -1.831600 | 1.017960  |
| H      | -0.450370 | -2.703510 | 1.510550  |
| C      | 0.980160  | -1.338470 | 0.729070  |
| O      | 2.020840  | -1.916790 | 1.036130  |
| C      | -2.714330 | -1.314190 | 0.759080  |
| C      | -3.250230 | -2.442200 | 1.365810  |
| H      | -2.649200 | -3.247080 | 1.774030  |
| C      | -4.658360 | -2.453550 | 1.388310  |
| H      | -5.235790 | -3.270990 | 1.803720  |
| C      | -5.233700 | -1.339090 | 0.800160  |
| S      | -3.997920 | -0.246510 | 0.213050  |
| C      | -6.656220 | -1.032850 | 0.643320  |
| C      | -9.442210 | -0.467220 | 0.344540  |
| C      | -7.110530 | -0.084470 | -0.285180 |
| C      | -7.619130 | -1.690600 | 1.425420  |
| C      | -8.983940 | -1.443070 | 1.277300  |
| C      | -8.464290 | 0.220990  | -0.430460 |
| H      | -6.394540 | 0.423820  | -0.925600 |
| H      | -7.298680 | -2.404660 | 2.177820  |

|   |            |           |           |   |            |           |           |
|---|------------|-----------|-----------|---|------------|-----------|-----------|
| C | -8.819360  | 1.272510  | -1.465040 | H | -14.450910 | -5.045340 | -2.524040 |
| H | -9.148450  | 2.205580  | -0.996040 | C | -16.245490 | -3.925140 | -0.913160 |
| H | -7.948510  | 1.504570  | -2.085040 | H | -16.574300 | -3.231960 | -0.142080 |
| H | -9.620540  | 0.950420  | -2.137730 | H | -16.101820 | -3.400100 | -1.857110 |
| C | -9.923120  | -2.228970 | 2.173110  | H | -16.971650 | -4.729930 | -1.027690 |
| H | -9.360350  | -2.737840 | 2.961160  | C | -15.083560 | -5.286990 | 0.802250  |
| H | -10.669030 | -1.595240 | 2.663160  | H | -14.118660 | -5.714320 | 1.073300  |
| H | -10.469900 | -2.994040 | 1.611900  | H | -15.421640 | -4.599210 | 1.573680  |
| B | -10.981990 | -0.162870 | 0.171540  | H | -15.824220 | -6.073020 | 0.653640  |
| C | -11.505840 | 1.340630  | 0.152590  | C | 2.714330   | 1.314190  | -0.759080 |
| C | -12.417060 | 4.012210  | 0.126850  | C | 3.250230   | 2.442200  | -1.365810 |
| C | -11.149660 | 2.243080  | 1.191500  | S | 3.997920   | 0.246510  | -0.213050 |
| C | -12.336470 | 1.818950  | -0.891190 | H | 2.649200   | 3.247080  | -1.774030 |
| C | -12.771350 | 3.152810  | -0.903200 | C | 4.658360   | 2.453550  | -1.388310 |
| C | -11.620470 | 3.559000  | 1.174430  | C | 5.233700   | 1.339090  | -0.800160 |
| H | -13.386880 | 3.478920  | -1.730410 | H | 5.235790   | 3.270990  | -1.803720 |
| H | -11.341230 | 4.213480  | 1.992370  | C | 6.656220   | 1.032850  | -0.643320 |
| C | -12.026590 | -1.352450 | 0.004250  | C | 7.110530   | 0.084470  | 0.285180  |
| C | -13.891830 | -3.443670 | -0.341570 | C | 7.619130   | 1.690600  | -1.425420 |
| C | -13.204480 | -1.419170 | 0.796820  | C | 8.464290   | -0.220990 | 0.430460  |
| C | -11.814060 | -2.368920 | -0.961390 | H | 6.394540   | -0.423820 | 0.925600  |
| C | -12.754250 | -3.395910 | -1.134250 | C | 8.983940   | 1.443070  | -1.277300 |
| C | -14.114100 | -2.466240 | 0.623950  | H | 7.298680   | 2.404660  | -2.177820 |
| H | -12.557940 | -4.140630 | -1.893320 | C | 9.442210   | 0.467220  | -0.344540 |
| H | -14.995170 | -2.489420 | 1.255220  | C | 8.819360   | -1.272510 | 1.465040  |
| C | -10.270780 | 1.845530  | 2.360930  | C | 9.923120   | 2.228970  | -2.173110 |
| H | -10.582950 | 0.900830  | 2.816640  | B | 10.981990  | 0.162870  | -0.171540 |
| H | -9.227770  | 1.723840  | 2.051600  | H | 9.148450   | -2.205580 | 0.996040  |
| H | -10.300320 | 2.610650  | 3.141840  | H | 7.948510   | -1.504570 | 2.085040  |
| C | -12.787090 | 0.948630  | -2.048000 | H | 9.620540   | -0.950420 | 2.137730  |
| H | -13.558000 | 0.237060  | -1.733780 | H | 9.360350   | 2.737840  | -2.961160 |
| H | -13.208760 | 1.561160  | -2.849800 | H | 10.669030  | 1.595240  | -2.663160 |
| H | -11.967060 | 0.366910  | -2.479350 | H | 10.469900  | 2.994040  | -1.611900 |
| C | -13.533590 | -0.396690 | 1.866110  | C | 11.505840  | -1.340630 | -0.152590 |
| H | -14.353470 | -0.749920 | 2.497770  | C | 12.026590  | 1.352450  | -0.004250 |
| H | -12.681980 | -0.191620 | 2.522180  | C | 11.149660  | -2.243080 | -1.191500 |
| H | -13.840600 | 0.557460  | 1.425780  | C | 12.336470  | -1.818950 | 0.891190  |
| C | -10.594990 | -2.411930 | -1.862660 | C | 13.204480  | 1.419170  | -0.796820 |
| H | -9.703430  | -2.726560 | -1.310270 | C | 11.814060  | 2.368920  | 0.961390  |
| H | -10.747370 | -3.121810 | -2.680640 | C | 11.620470  | -3.559000 | -1.174430 |
| H | -10.368000 | -1.440020 | -2.310390 | C | 10.270780  | -1.845530 | -2.360930 |
| N | -12.879660 | 5.448650  | 0.147580  | C | 12.771350  | -3.152810 | 0.903200  |
| N | -14.918930 | -4.537190 | -0.505700 | C | 12.787090  | -0.948630 | 2.048000  |
| C | -13.707330 | 5.816290  | -1.060530 | C | 14.114100  | 2.466240  | -0.623950 |
| H | -14.600260 | 5.194400  | -1.088460 | C | 13.533590  | 0.396690  | -1.866110 |
| H | -13.990250 | 6.863020  | -0.958450 | C | 12.754250  | 3.395910  | 1.134250  |
| H | -13.108670 | 5.680650  | -1.959780 | C | 10.594990  | 2.411930  | 1.862660  |
| C | -13.731900 | 5.688350  | 1.379090  | C | 12.417060  | -4.012210 | -0.126850 |
| H | -13.137940 | 5.498720  | 2.270430  | H | 11.341230  | -4.213480 | -1.992370 |
| H | -14.067670 | 6.725530  | 1.366970  | H | 10.582950  | -0.900830 | -2.816640 |
| H | -14.582950 | 5.009220  | 1.340900  | H | 9.227770   | -1.723840 | -2.051600 |
| C | -11.675420 | 6.370340  | 0.172380  | H | 10.300320  | -2.610650 | -3.141840 |
| H | -11.090100 | 6.176390  | 1.068040  | H | 13.386880  | -3.478920 | 1.730410  |
| H | -11.079280 | 6.174160  | -0.718090 | H | 13.558000  | -0.237060 | 1.733780  |
| H | -12.032550 | 7.400020  | 0.176250  | H | 13.208760  | -1.561160 | 2.849800  |
| C | -14.538820 | -5.546920 | -1.562030 | H | 11.967060  | -0.366910 | 2.479350  |
| H | -13.600850 | -6.024120 | -1.282810 | C | 13.891830  | 3.443670  | 0.341570  |
| H | -15.333640 | -6.290070 | -1.605980 | H | 14.995170  | 2.489420  | -1.255220 |

|   |           |           |           |   |           |           |           |
|---|-----------|-----------|-----------|---|-----------|-----------|-----------|
| H | 14.353470 | 0.749920  | -2.497770 | H | 13.108670 | -5.680650 | 1.959780  |
| H | 12.681980 | 0.191620  | -2.522180 | H | 13.137940 | -5.498720 | -2.270430 |
| H | 13.840600 | -0.557460 | -1.425780 | H | 14.067670 | -6.725530 | -1.366970 |
| H | 12.557940 | 4.140630  | 1.893320  | H | 14.582950 | -5.009220 | -1.340900 |
| H | 9.703430  | 2.726560  | 1.310270  | H | 11.090100 | -6.176390 | -1.068040 |
| H | 10.747370 | 3.121810  | 2.680640  | H | 11.079280 | -6.174160 | 0.718090  |
| H | 10.368000 | 1.440020  | 2.310390  | H | 12.032550 | -7.400020 | -0.176250 |
| N | 12.879660 | -5.448650 | -0.147580 | H | 13.600850 | 6.024120  | 1.282810  |
| N | 14.918930 | 4.537190  | 0.505700  | H | 15.333640 | 6.290070  | 1.605980  |
| C | 13.707330 | -5.816290 | 1.060530  | H | 14.450910 | 5.045340  | 2.524040  |
| C | 13.731900 | -5.688350 | -1.379090 | H | 16.574300 | 3.231960  | 0.142080  |
| C | 11.675420 | -6.370340 | -0.172380 | H | 16.101820 | 3.400100  | 1.857110  |
| C | 14.538820 | 5.546920  | 1.562030  | H | 16.971650 | 4.729930  | 1.027690  |
| C | 16.245490 | 3.925140  | 0.913160  | H | 14.118660 | 5.714320  | -1.073300 |
| C | 15.083560 | 5.286990  | -0.802250 | H | 15.421640 | 4.599210  | -1.573680 |
| H | 14.600260 | -5.194400 | 1.088460  | H | 15.824220 | 6.073020  | -0.653640 |
| H | 13.990250 | -6.863020 | 0.958450  |   |           |           |           |

## References

1. S. S. Zaleskiy and V. P. Ananikov, *Organometallics*, 2012, **31**, 2302-2309.
2. S. Griesbeck, Z. Zhang, M. Gutmann, T. Lühmann, R. M. Edkins, G. Clermont, A. N. Lazar, M. Haehnel, K. Edkins, A. Eichhorn, M. Blanchard-Desce, L. Meinel and T. B. Marder, *Chem. Eur. J.*, 2016, **22**, 14701-14706.
3. A. G. Crawford, Z. Liu, I. A. I. Mkhallid, M.-H. Thibault, N. Schwarz, G. Alcaraz, A. Steffen, J. C. Collings, A. S. Batsanov, J. A. K. Howard and T. B. Marder, *Chem. Eur. J.*, 2012, **18**, 5022-5035.
4. Y. Shi, K. Hou, Y. Wang, K. Wang, H. Ren, M. Pang, F. Chen and S. Zhang, *J. Mater. Chem. A*, 2016, **4**, 5415-5422.
5. K. Yang, T. He, X. Chen, S. Z. D. Cheng and Y. Zhu, *Macromolecules*, 2014, **47**, 8479-8486.
6. P. Harrison, J. Morris, T. B. Marder and P. G. Steel, *Org. Lett.*, 2009, **11**, 3586-3589.
7. S.-F. Liu, Q. Wu, H. L. Schmider, H. Aziz, N.-X. Hu, Z. Popović and S. Wang, *J. Am. Chem. Soc.*, 2000, **122**, 3671-3678.
8. N. S. Makarov, M. Drobizhev and A. Rebane, *Opt. Express*, 2008, **16**, 4029-4047.
9. S. de Reguardati, J. Pahapill, A. Mikhailov, Y. Stepanenko and A. Rebane, *Opt. Express*, 2016, **24**, 9053-9066.
10. Gaussian 09, Revision D.01, M. J. Frisch, G. W. Trucks, H. B. Schlegel, G. E. Scuseria, M. A. Robb, J. R. Cheeseman, G. Scalmani, V. Barone, B. Mennucci, G. A. Petersson, H. Nakatsuji, M. Caricato, X. Li, H. P. Hratchian, A. F. Izmaylov, J. Bloino, G. Zheng, J. L. Sonnenberg, M. Hada, M. Ehara, K. Toyota, R. Fukuda, J. Hasegawa, M. Ishida, T. Nakajima, Y. Honda, O. Kitao, H. Nakai, T. Vreven, J. A. Montgomery, J. E. P. Jr., F. Ogliaro, M. Bearpark, J. J. Heyd, E. Brothers, K. N. Kudin, V. N. Staroverov, T. Keith, R. Kobayashi, J. Normand, K. Raghavachari, A. Rendell, J. C. Burant, S. S. Iyengar, J. Tomasi, M. Cossi, N. Rega, J. M. Millam, M. Klene, J. E. Knox, J. B. Cross, V. Bakken, C. Adamo, J. Jaramillo, R. Gomperts, R. E. Stratmann, O. Yazyev, A. J. Austin, R. Cammi, C. Pomelli, J. W. Ochterski, R. L. Martin, K. Morokuma, V. G. Zakrzewski, G. A. Voth, P. Salvador, J. J. Dannenberg, S. Dapprich, A. D. Daniels, O. Farkas, J. B. Foresman, J. V. Ortiz, J. Cioslowski and D. J. Fox, Gaussian, Inc., Wallingford CT, 2009.
11. A. D. Becke, *J. Chem. Phys.*, 1993, **98**, 5648-5652.
12. C. Lee, W. Yang and R. G. Parr, *Phys. Rev. B*, 1988, **37**, 785-789.
13. P. J. Stephens, F. J. Devlin, C. F. Chabalowski and M. J. Frisch, *J. Phys. Chem.*, 1994, **98**, 11623-11627.
14. G. A. Petersson and M. A. Al-Laham, *J. Chem. Phys.*, 1991, **94**, 6081-6090.
15. G. A. Petersson, A. Bennett, T. G. Tensfeldt, M. A. Al-Laham, W. A. Shirley and J. Mantzaris, *J. Chem. Phys.*, 1988, **89**, 2193-2218.
16. T. Yanai, D. P. Tew and N. C. Handy, *Chem. Phys. Lett.*, 2004, **393**, 51-57.
17. S. Jungsuttiwong, R. Tarsang, T. Sudyoadsuk, V. Promarak, P. Khongpracha and S. Namuangruk, *Organic Electronics*, 2013, **14**, 711-722.
18. J. Preat, *J. Phys. Chem. C*, 2010, **114**, 16716-16725.
19. P. Wiggins, J. A. G. Williams and D. J. Tozer, *J. Chem. Phys.*, 2009, **131**, 091101.
20. M. J. G. Peach, P. Benfield, T. Helgaker and D. J. Tozer, *J. Chem. Phys.*, 2008, **128**, 044118.
21. M. J. G. Peach, A. J. Cohen and D. J. Tozer, *Phys. Chem. Chem. Phys.*, 2006, **8**, 4543-4549.
22. J. Tomasi, B. Mennucci and R. Cammi, *Chem. Rev.*, 2005, **105**, 2999-3094.
